# Supplementary material for: Targeting CDA-Directed Metabolism With 5-Formyl-2'-Deoxycytidine For ALK Inhibitor–Resistant Lung Cancer Therapy
Source: Research Square preprint supplement (doi:10.21203/rs.3.rs-1110449/v1), 2021-12-01
Supplement: Supplementary file 1 [file 117fbc8173fefe44be71acb9.xlsx]

## Sheet: Sheet1
Supplementary Table 6. Differentially expressed genes identified by scRNA-seq (also see Fig 2).
Gene	Cluster 0	Cluster 1	Cluster 10	Cluster 11	Cluster 2	Cluster 3	Cluster 4	Cluster 5	Cluster 6	Cluster 7	Cluster 8	Cluster 9
RPS14	0.332141			-0.436818	-0.452118					-0.383815	-0.896245	-0.697065
TUBA1B	-1.20172	-0.347968		0.962341	1.26637	-0.964153	-0.868361	-1.38582	-0.288717	1.21959	0.475723	0.485768
TUBB	-1.00006	-0.363533	-0.502789	0.882782	1.13125	-0.819281	-0.764176	-0.982995		1.15904	0.421488	0.48347
RPS18	0.346758			-0.564568	-0.680554			0.346882		-0.605851	-1.03337	-0.543921
RPL3	0.416414		0.295595	-0.613741	-0.623301			0.328412		-0.476619	-0.949668
RPL18A	0.333682			-0.618886	-0.640674			0.333625		-0.539633	-1.02681	-0.628
RPL13	0.293565			-0.515533	-0.563857			0.351193		-0.459628	-0.911508	-0.637079
RPS27	0.450513		0.329908	-1.14001	-1.26759	0.355668		0.383716		-1.15845	-1.54335	-0.709909
RPS8	0.267433			-0.369839	-0.463276					-0.27649	-0.821181	-0.538795
RPL34	0.335247		0.339003	-0.924695	-0.730987	0.275723		0.303596		-0.660476	-1.11213	-0.643166
H2AFZ	-0.550176		-0.260789	0.436843	0.570798	-0.288525	-0.295033	-0.796162	0.267819	0.550526
RPL15	0.255649				-0.327666						-0.728088	-0.49771
RPS6	0.27274			-0.289266	-0.277721			0.252527			-0.785928	-0.470194
RPS15	0.304939		0.271273	-0.545866	-0.557886			0.278918		-0.472923	-0.964785	-0.521261
EEF1A1	0.354059	-0.259961	0.344486	-0.345903	-0.477069					-0.381888	-0.748678
GNB2L1	0.323472				-0.270658						-0.664621
RPL11	0.309443		0.274441	-0.368696	-0.427672			0.299617		-0.33493	-0.851101	-0.352802
S100A14	0.599855	-0.434073	0.515366	-1.85484	-2.1728	0.680325		0.374456		-2.03654	-2.36539	-0.290798
HMGA1	0.466936		0.505613	-1.16913	-1.20557		0.255291	0.645511		-1.07636	-1.5978	-0.474339
RPL10A	0.320191			-0.427504	-0.352585			0.30963		-0.312752	-0.644318	-0.417743
EPB41L4A-AS1	0.311964		0.267112	-0.359495	-0.599978					-0.527131
RPL4	0.319362		0.25562	-0.46457	-0.374209					-0.277672	-0.656003
RPL36	0.355613			-0.780114	-0.877056	0.266692		0.351627		-0.803032	-1.19936	-0.668948
RPS13	0.288559			-0.438764	-0.41336			0.346958		-0.311336	-0.828106	-0.636833
ASS1	0.366444	-0.279862		-0.799328	-0.636503	0.408857		0.289026	-0.302638	-0.64649	-0.667864
RPS25	0.288275			-0.368684	-0.516127			0.277759		-0.372847	-0.903321	-0.492705
HMGB1	-0.606978			0.497387	0.715723	-0.545257	-0.42228	-0.826122		0.759714
ZFAS1	0.473601		0.33419	-1.29716	-1.45019		0.269672	0.57214		-1.29034	-1.39329	-0.538425
HMGB2	-0.86767			0.583154	0.750897	-0.61007	-0.529137	-1.10784	0.643537	0.794744	0.37122
ERRFI1	0.351294		0.709551	-0.644804	-0.720672			0.434757	-0.338885	-0.667388	-0.615421	0.352815
C6orf48	0.372693		0.336282	-0.837738	-0.828255			0.300489		-0.815287	-0.641059
RPL31	0.294893		0.297785	-0.446915	-0.380752			0.270396		-0.35765	-0.793089	-0.72229
DDIT3	0.35954		0.785517	-0.911736	-0.89898	0.25669		0.393985		-0.817582	-0.769894	0.26645
RPS28	0.292067			-0.52554	-0.712028			0.275172		-0.605965	-1.00015	-0.695803
AGR2	0.484814	-0.720972	0.795887	-1.5997	-1.46196	0.583467		0.539562	-0.466837	-1.63087	-0.946126	0.6397
UBE2C	-0.885063		0.269261	0.618018	0.76966	-0.63874	-0.577566	-0.848159	0.927107	0.709187	0.291124
LINC00493	0.259018			-0.455345	-0.45779			0.311501		-0.359567	-0.462637
UBXN1	0.350206			-0.618131	-0.53238			0.265312		-0.565524	-0.712032
SNHG8	0.302059			-0.735312	-0.726461			0.307801	-0.251235	-0.69543	0.287246
RPS29	0.297494		0.298757	-0.891674	-0.808781					-0.778675	-1.08234	-0.762403
RPL10	0.250594				-0.264801			0.265941			-0.549952	-0.396019
ECI1	0.286217			-0.66778	-0.645345					-0.540763	-0.558182
EEF2	0.375134	-0.297265	0.586719	-0.494739	-0.663522			0.426955	-0.290924	-0.609063	-0.799054
RANBP1	-0.620048			0.468108	0.735368	-0.467277	-0.373879	-0.807213		0.794423
DDIT4	0.304233	-0.35772	1.01442	-0.629543	-0.682838	0.254499		0.318268	-0.275102	-0.64303	-0.475566	0.450993
PFDN2	0.330463		0.72357	-0.494099	-0.540948			0.364538		-0.503248	-0.819059
RBCK1	0.335624			-0.873928	-0.878988	0.265012		0.426399		-0.964812	-0.894062
SPRR2D	0.292437			-0.299849	-0.475056			0.268512		-0.444513	-0.460376
RSL24D1	0.263056	-0.295828	0.844265								-0.559438
S100A6	0.325256		0.34575	-0.676209	-0.746822	0.35334		0.413382		-0.670594	-0.718667
GDF15	0.339726	-0.418906	0.523422	-1.59759	-1.63325	0.572728		0.545524	-0.892934	-1.56969	-1.33778	1.28287
S100P	0.294919	-0.422639	0.673554	-0.932171	-0.845956	0.718479		0.309578	-0.415277	-0.777716	-0.785324
CYSTM1	0.251111			-0.463358	-0.546661			0.276527		-0.42259	-0.527887
PRSS1	0.364733	-0.516545	0.567113	-2.08993	-2.0072			1.38073	-0.828927	-2.10259	-1.61614	0.67553
EIF4EBP1	0.310862			-0.396377	-0.741005	0.283755		0.296493		-0.590896	-0.910255	-0.397479
ISG15	0.293933			-0.506622	-0.608547			0.560918		-0.427922	-0.772705
TUBB4B	-0.973871	-0.526963		0.949632	1.11549	-0.891413	-0.788024	-0.939343		1.11345	0.442572	0.524151
ATP5G2	0.270568			-0.381434	-0.301059					-0.266849	-0.779555	-0.407315
DUSP5	0.256805			-0.597765	-0.704622			0.462684		-0.632249	-0.512604
HERPUD1	0.251473	-0.263402	0.569592	-0.416496	-0.600602			0.432311		-0.598287	-0.362841	0.452412
TSTD1	0.271957		0.274202	-0.740839	-0.812719	0.367194		0.463345		-0.760961	-0.717972
GSTP1	-0.470539		-0.757112	0.607979	0.747922	-0.275309	-0.395967	-0.449929		0.74909
KRT18	0.323463	-0.364258	0.318524		-0.253023			0.254514	-0.347146		-0.643486
RRM2	-0.52026	0.315002		0.369746	0.454796	-0.264844		-0.48462		0.368594		0.289938
KIAA0101	-0.719507	0.535768	-0.488082	0.491043	0.557541			-0.773367		0.420752
CDK1	-0.468774		0.455972	0.440815	0.619369	-0.342935	-0.307162	-0.40667		0.633081
CKS2	-0.755436		-0.258657	0.547764	0.616811	-0.618589	-0.507354	-0.929047	1.01915	0.630074
PHLDA1	0.273933		0.490516	-0.873195	-0.765217			0.500984		-0.743751	-0.70055
CRELD2	0.257729			-0.534145	-0.561568			0.389574		-0.649126		0.447265
TNFAIP2	0.26744			-1.01306	-0.887486	0.310152	0.278686	0.391784		-0.7971	-0.672883
EIF3F	0.253226			-0.308773							-0.473915
TOP2A	-0.317188							-0.27012	0.640846
HSP90B1	0.305329	-0.499029		-0.493097	-0.591978			0.305733		-1.00891		1.42405
AKR1B1	-0.839096		-1.21672	0.676822	1.13016	-0.759241	-0.597505	-1.10014		0.988091	0.524433
CKS1B	-0.65432	0.25945	-0.398007	0.616393	0.486031	-0.359504	-0.300927	-0.789	0.658626	0.486964
MANF	0.250028	-0.264177	0.343755	-0.416165	-0.319954			0.300597		-0.58788		0.502922
LCN2	0.381647		0.378005	-1.91397	-2.12689	0.378709		0.95477	-0.547608	-2.21571	-1.45961	0.334189
S100A9	0.348645	-0.471638	1.1099	-1.26074	-1.42697	1.10953			-0.792114	-1.25204	-1.44989
TK1	-0.617871		-0.48058	0.670211	0.753484	-0.429689	-0.365564	-0.698105		0.676528	0.266273
C9orf16	0.297169			-0.838951	-1.00643	0.385395		0.584078		-0.962545	-1.26207	-0.764482
PHLDA2	0.270273		0.517467	-0.653522	-0.808608			0.648477		-0.714909	-0.903407
ACTB	-0.446139	-0.378843		0.592577	0.760075	-0.657502	-0.308761			0.874739		0.366589
AURKB	-0.429902			0.374193	0.500054	-0.327516	-0.295458	-0.412472	0.296038	0.510332	0.487472
HSP90AA1	-0.59844	-0.304594	-0.313007	0.593302	0.792247	-0.580416	-0.531672	-0.662213		0.919275	0.312472	0.860785
CFL1	-0.449572		-0.4771	0.501931	0.648909	-0.553663	-0.421354	-0.634281		0.814716
STMN1	-0.650435			0.566117	0.803887	-0.582978	-0.454941	-0.674163		0.772161
SDF2L1	0.257897			-0.411795	-0.701379			0.313895		-0.744965
MGST1	-0.594335		-0.757562	0.562699	0.839357	-0.475344	-0.480854	-0.823845		0.466472	1.31758
HMGN2	-0.46558		-0.440669		0.538413	-0.353295		-0.750744		0.57549		-0.280401
KPNA2	-0.724312	-0.454645		0.805015	0.8113	-0.574573	-0.534259	-0.646073	0.39315	0.881936	0.527417	0.461562
UBE2T	-0.517516			0.485016	0.664439	-0.292421	-0.338155	-0.497393		0.586396
RAN	-0.442017		-0.37502	0.711444	0.756244	-0.486319	-0.399014	-0.646783		0.829413
NUSAP1	-0.332371			0.380571	0.356234			-0.30905	0.3495	0.412719
MYL6	-0.506157		-0.265392	0.586611	0.818701	-0.58591	-0.451864	-0.683263		0.847048
CAV1	-0.689937		-0.980786	0.781502	0.889475	-0.820272	-0.483826	-1.06057		0.697879	0.802846
AKR1C1	-0.755073	-0.446845	-0.753808	0.83755	1.08669	-0.6625	-0.628479	-0.939812	-0.282438	1.11432	0.526033
PKM	-0.684949	-0.545088		0.771287	1.04503	-0.661724	-0.634778	-0.832085	-0.477291	1.10616	0.447244	0.601085
CENPU	-0.391169			0.3116	0.522787			-0.383211		0.396101
AKR1C2	-0.74257	-0.372318	-0.676191	0.828046	1.07001	-0.560475	-0.588245	-1.05354	-0.266432	1.00566	0.586148
BIRC5	-0.495114			0.598317	0.500685	-0.459235	-0.322487	-0.757445	0.663066	0.574921
HMGN1	-0.318655	0.329961	-0.39318	0.301587	0.298329			-0.38882		0.293299		-0.302488
PRSS23	-0.694532		-0.901495	0.450728	0.800745	-0.691986	-0.465782	-0.869928		0.403279	1.29346	0.260595
MKI67	-0.303897							-0.338755	0.57185		0.369262
CENPF	-0.419976		-0.324466	0.693974	0.283013	-0.327798		-0.466004	0.776806	0.332295	0.333556
SFN	-0.749855		-0.775352	0.76665	0.909129	-0.849097	-0.535137	-0.959758		0.966758	0.691492	0.290083
PTGR1	-0.756084	-0.251286	-0.906282	0.754943	1.02567	-0.740129	-0.585345	-1.04449		1.02224	0.643333
MAD2L1	-0.398036			0.57828	0.5395	-0.301461	-0.270928	-0.38274		0.672836	0.270664
H2AFX	-0.358321			0.310002	0.305985			-0.358664	0.367595	0.487559
ZWINT	-0.412245				0.534303	-0.27092		-0.42185		0.498259	0.557447
TXN	-0.37823		-0.600808	0.554233	0.655824	-0.495467	-0.280586	-0.789073		0.671205		-0.259449
TYMS	-0.435349		-0.304444	0.293422	0.528141	-0.305116	-0.25854	-0.490418		0.587521	0.337399
CENPK	-0.261586		-0.258755		0.2511					0.257879
AURKA	-0.414581				0.432629	-0.347011	-0.30066	-0.415215	0.707753	0.521041
CCNB1	-0.568461	-0.448841		0.904739	0.713282	-0.526892	-0.468928	-0.598696	0.456088	0.746803	0.410949	0.466801
ATAD2	-0.266672	0.335509									0.293028
PTTG1	-0.454364	-0.32494		0.477506	0.574718	-0.531913	-0.468472	-0.893946	0.918218	0.636007
LDHA	-0.591064	-0.315534	-0.300731	0.848214	0.95932	-0.455327	-0.526624	-0.629166		0.88732
CAPN2	-0.375313		-0.367314	0.256032	0.578641	-0.355637	-0.266671	-0.309024		0.576271		0.251606
S100A10	-0.307513	0.25944	-0.548108	0.365469	0.517238	-0.754492	-0.298487	-0.595801		0.58958		-0.330858
CENPA	-0.351451					-0.272514		-0.382927	0.847065	0.336741
TXNRD1	-0.55037		-0.752674	0.496181	0.639378	-0.331469	-0.268956	-0.838432		0.697529	0.278916	0.374169
CDCA3	-0.312035								0.324227
MT-ND1	-0.303245		-1.21957	0.458131	0.386229			-0.272554		-0.881098	0.415014	0.594572
FTL	-0.362487	0.441843	-1.47335	0.366511	0.390601			-1.07853		0.389232	-0.282412	-0.864237
CYR61	-0.797361		-0.979934		0.462907	-0.649978	-0.449034	-0.857524	-0.447551		2.18286	0.470684
CLPTM1L	-0.643059	0.431685	-1.16478	0.343037	0.526857	-0.528308	-0.281314	-0.991904		0.402839	0.728042
CDKN3	-0.408433		-0.520188	0.574726	0.464774	-0.423538	-0.298623	-0.665442	0.747325	0.470725
EMP2	-0.581161		-0.770826		0.51434	-0.313263	-0.303702	-0.585155		0.260672	1.3266	0.350504
TP53I3	-0.607123		-0.747195	0.579447	0.875605	-0.591271	-0.437892	-0.790818		0.779468	0.626224
SUB1	-0.345913			0.473852	0.60293	-0.367025	-0.256806	-0.648117		0.633416
DEK	-0.40436	0.39685	-0.342988			-0.25541		-0.475741		0.361528
SMC4	-0.348715			0.570074	0.264124			-0.335969	0.278604	0.335689	0.258962	0.358096
GMNN	-0.388908		-0.417528	0.323151	0.594938	-0.27815		-0.439182		0.510462
HN1	-0.343397		-0.494245	0.474262	0.345911	-0.330029	-0.255068	-0.424329	0.666712	0.436771
FEN1	-0.317171			0.253089	0.431742			-0.285643		0.467092		0.30409
DHFR	-0.372511		-0.390001		0.403575			-0.41048		0.339736	0.314094
PPIA	-0.324301		-0.327258	0.612792	0.63218	-0.274469	-0.322109	-0.475865		0.700964
CENPM	-0.293522				0.311366			-0.322026		0.277077
HSPE1	-0.452788		-0.831317	0.489379	0.64262	-0.357697	-0.348516	-0.83005		0.605741
HNRNPA2B1	-0.436561			0.520447	0.601276	-0.340844	-0.311039	-0.579018		0.617374	0.384514	0.446096
MT-ND3	-0.392539		-0.859316	0.674119	0.645408			-0.42462		-0.506246	0.523159	0.88745
H2AFV	-0.338373	0.353757	-0.332699					-0.55019	0.448203
GCLM	-0.615605		-0.666373	0.730122	0.85248	-0.328132	-0.324957	-0.876904		0.819773	0.49925
CDC20	-0.433777	-0.35434		0.693922	0.583442	-0.451477	-0.355124	-0.541798	0.504474	0.711002	0.356056
MT-ND2	-0.358056		-0.934031	0.531883	0.558134			-0.514063		-0.857625	0.556612	0.745492
UBC	-0.532057	-0.427823	0.315224	0.754838	0.84317	-0.556277	-0.453999	-0.503156	-0.270071	0.787028	0.471111	0.688001
CENPW	-0.326789				0.303689			-0.472603	0.372529	0.318386
TUBA1C	-0.65396	-0.46582		0.938003	0.931861	-0.547237	-0.539427	-0.657418		0.886889	0.282854	0.29935
NFKBIA	-0.30943	-0.344337	0.693431		0.368379		-0.280081			0.494562	0.417177	0.54293
HIST1H4C	-0.731877	1.14533	-1.16181	-0.353858				-0.791584			-0.429545	-0.459477
ZNF706	-0.335075	0.295097	-0.765415		0.258404	-0.274311		-0.448755	0.420202	0.377484		-0.317428
AKR1B10	-0.471725	-0.295127	-0.555172	0.796216	0.759325	-0.304906	-0.363079	-0.534939		0.833543	0.375365
TPI1	-0.349708			0.512237	0.728195	-0.382786	-0.389813	-0.518167		0.772746
MT-ATP6	-0.259676		-0.778575	0.269148	0.283496					-0.909307	0.29452	0.684466
STRA13	-0.492182	0.50783	-0.776713		0.366808			-0.745172				-0.348457
LSM3	-0.435975		-0.428515		0.48451			-0.647523		0.488845
PTGES3	-0.432286			0.50763	0.756058	-0.425336	-0.34941	-0.509587		0.799975
ARL6IP1	-0.554559	-0.401843		0.628196	0.556275	-0.483419	-0.424449	-0.482496	0.611932	0.335212	1.12747	0.253942
F3	-0.518623		-0.374292		0.336381	-0.485064		-0.521631			1.56673	0.34785
GAS6	-0.360495		-0.587043	0.34994	0.484891	-0.460338		-0.503109			0.614798
STXBP6	-0.380503	0.254815	-0.44737	0.647055	0.479644	-0.362375		-0.508339		0.425176
SNRPE	-0.377461		-0.386684	0.497379	0.54058	-0.31803		-0.667058		0.572558
MCM3	-0.29214			0.273115	0.456092			-0.278661		0.460136	0.276568
DYNLL1	-0.293975			0.505766	0.382381	-0.283988		-0.319223	0.358042	0.50595		-0.303131
DNAJC9	-0.305637				0.340223			-0.260232		0.26994
HSPB11	-0.484505		-0.71451		0.576442			-0.569714		0.581951
UBE2S	-0.372352		-0.850157			-0.279911		-0.852082	1.3551		-0.506688
UBE2E3	-0.458311		-0.779894	0.474825	0.59742	-0.326827		-0.695085		0.551427
SIVA1	-0.25372	0.438592	-0.67093					-0.37566			-0.319317	-0.34287
CARHSP1	-0.377354		-0.409739		0.410507			-0.345001		0.361609
LPCAT1	-0.285861		-0.377967					-0.312647			0.754862
NME1	-0.390045		-0.576352	0.416808	0.748368	-0.471011	-0.343365	-0.744138		0.712924
ANXA1	-0.716304	-0.527697	-0.623068	0.802327	1.14028	-0.78131	-0.659988	-0.976321	-0.25619	0.998037	0.600841	0.439497
CNN3	-0.325143			0.481987	0.430135	-0.275035		-0.348077		0.52404
DRAP1	-0.327968		-0.4063	0.525657	0.503099	-0.430293		-0.437032		0.344541
DUT	-0.443475			0.691157	0.561019		-0.262326	-0.395284		0.54139
NUCKS1	-0.311016		-0.507697					-0.413844	0.522286	0.385687		0.263399
AXL	-0.305715						0.319643	-0.403337			0.62252
YWHAQ	-0.43953		-0.468094	0.46589	0.772236	-0.444085	-0.337198	-0.535401		0.743536
PRDX1	-0.576137	-0.668184		0.936815	1.08855	-0.607356	-0.636885	-0.800147	-0.443542	1.08306	0.3743
TMEM14B	-0.402896	0.278219	-0.750047	0.593291	0.458855	-0.344518		-0.657948		0.411493	0.295552	-0.363
CAV2	-0.44957	0.259734	-0.926588	0.342494	0.434484	-0.495167		-0.725011	0.377726	0.439152	0.461461
GPRC5A	-0.280425										1.11596
TALDO1	-0.444817	-0.411089		0.62155	0.898874	-0.440851	-0.446932	-0.478503	-0.328838	0.837024	0.28228
ALDH3A1	-0.413316		-0.528007	0.594606	0.664396	-0.269667	-0.278107	-0.49197		0.710042	0.265945
BCL2L12	-0.269977			0.319309				-0.321678		0.360804
SNRPG	-0.289363		-0.413877	0.358022	0.329501			-0.45507		0.54118		-0.254732
ERH	-0.30459				0.525305	-0.276148		-0.282589		0.545644
ANXA2	-0.310925	-0.449361		0.666025	0.697922	-0.309602	-0.407613	-0.386869	-0.306483	0.744134		0.643172
SNRPD1	-0.271937			0.300197	0.460779			-0.380061		0.422954
TMEM106C	-0.339418	0.333136			0.264632			-0.254406
SKP1	-0.442923	-0.369031		0.562314	0.835212	-0.504547	-0.460524	-0.548324		0.928459
HMGB3	-0.31898				0.366364				0.319705	0.480573
TUBA4A	-0.466112		-0.330886	0.836212	0.779701	-0.489414	-0.387341	-0.433249		0.805307	0.299811
CDA	-0.353313		-0.663628		0.511483	-0.505263		-0.531613		0.601509
CST6	-0.516373		-1.02043	0.410506	0.690472	-0.849931	-0.397519	-0.82912		0.387598	0.872489
GGH	-0.385448			0.76687	0.593797	-0.332811	-0.28102	-0.418477		0.272941	0.893742
PCNA	-0.331392			0.386185	0.548917			-0.289059		0.530261
CORO1C	-0.351426		-0.408831	0.312759	0.375209	-0.310844		-0.339738		0.456294	0.492254	0.285421
TFDP1	-0.353486	0.355354	-0.435826		0.257916			-0.464165		0.264831
IL32	-0.456674		-0.56237	0.483428	0.666002	-0.51597	-0.378766	-0.577008		0.763672	0.287466
RPL39L	-0.317441	0.329691						-0.402318	0.354554		-0.289989	-0.351362
MDH1	-0.267972	-0.34112	0.521238	0.536328	0.625963	-0.32305	-0.319858	-0.350253		0.663302		0.366864
TAGLN2	-0.346626			0.590424	0.535549	-0.329526	-0.266024	-0.393693		0.594326
FABP5	-0.39985		-0.487059	0.438383	0.643057	-0.327858	-0.308044	-0.389904		0.609695
AP2S1	-0.255842		-0.362695		0.362385			-0.32421		0.399622		-0.287626
ATP5G1	-0.33253		-0.634144	0.314398	0.426074			-0.610522		0.401491
FOSL1	-0.250322							-0.258741		0.258082
TCEB1	-0.336437		-0.465508	0.327576	0.323236			-0.535417	0.255273	0.475778
C12orf75	-0.277113	0.354526	-0.468205		0.259147	-0.287174		-0.435566		0.273193		-0.270362
UQCRB	-0.333181			0.530619	0.519479	-0.263441	-0.2604	-0.577925		0.633342		-0.279842
BPIFB1	-0.292364	-0.673259		-1.16264	-1.25603	1.62588		0.485888	-0.638676	-1.18635	-1.15663
BANF1	-0.357241		-0.265053	0.330483	0.52676	-0.372804	-0.276629	-0.530374		0.605501
YWHAH	-0.391637		-0.569968	0.441943	0.533563	-0.303923		-0.423344		0.487972
GLA	-0.294963			0.410696	0.438862			-0.310247		0.302686	0.583602
PGP	-0.29023	0.373747	-0.542087					-0.382325	0.299297
LTB	-0.380645	0.293	-0.346714		0.414958	-0.517898					0.56675
EIF4A1	-0.454102	-0.681079	0.33526	0.820159	0.889104	-0.504486	-0.521559	-0.61966	-0.434599	0.919412	0.541033	0.590592
RPA3	-0.359568		-0.281747		0.491865			-0.531367		0.516652
MRPL33	-0.319216	0.289707	-0.431554	0.314856	0.336162			-0.548088	0.311626	0.262981		-0.309897
SLC3A2	-0.264509	-0.743807	0.303468	0.414598	0.472588	-0.335406	-0.366801		-0.566027		1.26805	1.37316
ENO1	-0.494802	-0.620899	0.260476	0.730809	1.00305	-0.522033	-0.589002	-0.594066	-0.512556	0.956961	0.267795	0.481655
SKA2	-0.266374							-0.335495		0.319137
CDK4	-0.317349		-0.531199	0.302791	0.313575					0.452955
CCDC85B	-0.339908	0.397052	-0.899707	0.272962	0.296452	-0.405998		-0.643943	0.287217	0.33906
ADM	-0.265671		-0.318314					-0.298035			1.31686
ATP5G3	-0.300648		-0.262185	0.324028	0.503388		-0.257417	-0.401578		0.544305
C15orf48	-0.395189		-0.406668		0.434648	-0.481992		-0.319053		0.381053	0.601443
ALDOA	-0.258817	-0.283675		0.509516	0.657914		-0.323477	-0.400174	-0.317716	0.706778
WDR34	-0.272547			0.310152				-0.266051		0.324489
POLR3K	-0.314538		-0.373457		0.369207			-0.296295
PLK2	-0.304763			0.36477	0.416334			-0.279402		0.607819	0.497193	0.257132
DTYMK	-0.284723			0.266943	0.303924			-0.368535	0.29902	0.364573
ZC3H15	-0.32275		-0.256131	0.466471	0.46208	-0.308958		-0.533375		0.560329
SLBP	-0.30443			0.265768	0.448673			-0.26022		0.498763
UBE2L3	-0.36389		-0.484491	0.322163	0.611527	-0.340133	-0.271646	-0.546179		0.655565
HMGN3	-0.344239	0.296182	-0.443685	0.286117	0.288924			-0.664282	0.294882	0.364025		-0.322404
ENY2	-0.321668		-0.38537	0.267318	0.439598	-0.271994		-0.480074		0.449264
SRP9	-0.318633			0.337237	0.502204			-0.369631		0.449412
NDUFC2	-0.296343		-0.377476		0.512528	-0.25902	-0.265874	-0.377404		0.360863	0.711817
PGK1	-0.603794	-0.478217		0.75354	0.927205	-0.511864	-0.530157	-0.639825	-0.360606	1.02449	0.366214	0.530406
CFL2	-0.373605			0.337604	0.571889	-0.348358	-0.26168	-0.307816		0.578442
PRMT1	-0.25643	-0.374424		0.34781	0.663237	-0.344631	-0.333639	-0.323397		0.725582		0.270664
UBE2V2	-0.406444		-0.394259	0.686094	0.637316	-0.371803	-0.277874	-0.547884		0.645723
RPL22L1	-0.341268		-0.795657	0.463364	0.517619	-0.313547	-0.25708	-0.600244		0.5326
VDAC3	-0.393682			0.395122	0.693682	-0.334798	-0.303565	-0.396396		0.602732	0.396899
EMP3	-0.266399			0.370192	0.418519	-0.280423		-0.323315		0.283657	0.560161
COX7B	-0.36598		-0.567462		0.541843			-0.669853		0.533067		-0.305361
EIF5A	-0.393037		0.512946		0.376526	-0.336731	0.523134	-0.439829		0.444983
BPIFA1	-0.389674	-0.767007	0.266515	-1.30207	-1.39582	1.71169		0.586059	-0.869154	-1.31916	-1.26917	0.381185
PSMA4	-0.317349	-0.422305	0.451043	0.381895	0.754235	-0.388634	-0.412708	-0.412298		0.743522		0.35181
CBX3	-0.304174				0.356404			-0.379907		0.330604	0.251503
PEG10	-0.253201	0.348684	-0.418324					-0.334077	0.324117
CKB	-0.339852		-0.297163	0.271632	0.642172	-0.25138	-0.313447	-0.301343		0.694263
SNRNP25	-0.275975	0.344085	-0.37509	0.281023				-0.37569				-0.331719
CCT5	-0.504879	-0.569583		0.823491	0.904656	-0.488258	-0.52217	-0.605597	-0.392867	0.958698	0.257037	0.676058
HSP90AB1	-0.339936	-0.353245		0.442825	0.656559	-0.403009	-0.334043	-0.488745		0.71307	0.255763	0.749389
SRSF2	-0.343432		-0.28401	0.344837	0.316084	-0.260089		-0.437397		0.29963	1.19891	0.347461
PRKRA	-0.350666		-0.40307	0.480232	0.469846	-0.26743		-0.524427		0.394164
RHEB	-0.293326				0.359492			-0.263466	0.250898	0.340324
CHORDC1	-0.280042		-0.301161	0.265484	0.446401	-0.255904		-0.328639		0.562906
SOD2	-0.339635			0.346822	0.605775			-0.307775		0.475255
HNRNPM	-0.268829	-0.265413	0.250277	0.375028	0.504408	-0.265618	-0.255408	-0.276546		0.586327		0.553169
SSB	-0.253022	-0.27009			0.584018	-0.270518				0.488597	0.26865	0.413868
SUMO3	-0.306448			0.566918				-0.394809		0.325988
FSCN1	-0.376845			0.40752	0.592454	-0.384025	-0.258317	-0.507749		0.609514
TOMM40	-0.360838		-0.371389	0.384117	0.55083	-0.310923		-0.423577		0.54309	0.362894
MT-ND6	-0.411978		-0.428438	0.721678	0.668678	-0.287233		-0.297273			0.644225	0.520488
ANXA5	-0.458691	-0.273068		0.673467	0.773913	-0.459521	-0.368798	-0.369615		0.868566
ARPC5	-0.35303		-0.282071	0.437738	0.596018	-0.35245		-0.344844		0.625267
DCAF13	-0.294092	-0.304533		0.47451	0.626223	-0.327168	-0.314663	-0.32456		0.590923	0.394344	0.45435
EIF4A3	-0.289167	-0.33448	0.265263	0.48181	0.589037	-0.304482	-0.307685	-0.25605		0.644299		0.483064
NUDC	-0.290853	-0.277617		0.513601	0.648004	-0.364351	-0.306987	-0.328092		0.629735		0.328074
HIST1H2BK	-0.312218		-0.820897	0.397747	0.574636	-0.363969	-0.29806	-0.595417		0.619905
PSMA3	-0.292561	-0.348279	0.528454	0.567212	0.625873	-0.349186	-0.318825	-0.381007		0.660984	0.407058
C20orf24	-0.308231		-0.347681		0.440955			-0.360661		0.259199	0.42891
RBX1	-0.334676			0.606823	0.521917	-0.281653	-0.250764	-0.540263		0.577776
TMEM14C	-0.311396		-0.579169	0.343144	0.488889	-0.298786		-0.412878		0.452629	0.399603
NASP	-0.260562			0.368248	0.282557			-0.287284		0.442497	0.398789	0.501309
AKR1C3	-0.479997	-0.400676		0.795684	0.910371	-0.46476	-0.427908	-0.647739		0.834443	0.271837
TMEM14A	-0.292811		-0.493315	0.367881	0.442446	-0.257867		-0.427521		0.338925	0.401884
PGAM1	-0.344102		-0.484097	0.48825	0.508731	-0.283148		-0.426421		0.678271
BAX	-0.29518			0.3108	0.36204			-0.358523		0.337589
TPM1	-0.340942		-0.584562	0.522285	0.521899	-0.45685		-0.434958		0.556664
CLTB	-0.279405	0.295527	-0.392966	0.283195	0.286481	-0.291799		-0.407521		0.37232
SNRPC	-0.281193			0.586845	0.614385	-0.338794		-0.351272		0.690822
SSBP1	-0.257175			0.457206	0.586955	-0.31003		-0.358896		0.586525
PUF60	-0.309243	-0.28267	-0.311734	0.53713	0.660552	-0.294694	-0.278132	-0.306817		0.604002	0.270526	0.293759
AP2M1	-0.348668		-0.251632	0.436899	0.605259	-0.318455	-0.312386	-0.365655		0.680298
CTSD	-0.32152	-0.318845		0.637332	0.591275	-0.281133	-0.289026	-0.262394			1.07998	0.363177
HN1L	-0.275681		-0.256597		0.350745	-0.261492				0.378304
TMEM123	-0.255031		-0.380157		0.335492						0.473699
PARP1	-0.273105				0.422849					0.324056
AJUBA	-0.25857		-0.28967		0.315857			-0.251778		0.365054
POLE4	-0.278246		-0.521715	0.352981	0.345562			-0.410658		0.346756		-0.272941
ANXA3	-0.445384			0.630322	0.805315	-0.56389	-0.392363	-0.503003		0.753741
SRSF3	-0.313608			0.592888	0.613431	-0.323575	-0.301961	-0.428685		0.637714
HNRNPA0	-0.278063				0.512274	-0.267697		-0.368503		0.546789
SNRNP70	-0.338443		-0.395524	0.678661	0.556163	-0.301302	-0.269525	-0.339078		0.563104	0.312777	0.32967
MRPL13	-0.308576			0.358695	0.675935	-0.349201	-0.301283	-0.410486		0.635959
BASP1	-0.292789	0.348958	-0.457595			-0.345001		-0.532123	0.408415			0.275586
B4GALT1	-0.315042	-0.297702	1.14159	-0.493211	-0.577818		1.26279			-0.520269	-0.317101
CLDN4	-0.407929	-0.34497		0.384739	0.380728		-0.310175	-0.303225			1.53179	0.512992
FUS	-0.291309							-0.257044		0.265909	0.961521	0.537488
CACYBP	-0.326606			0.421706	0.534782		-0.257225	-0.423012		0.626876
PA2G4	-0.312847			0.421515	0.593728	-0.339176	-0.252053	-0.356475		0.632764		0.388664
2021-09-15	-0.307104			0.318627	0.484273			-0.316625		0.266557	0.744892
C1orf56	-0.37585	-0.372717	2.03669	-0.418803	-0.48479		1.00326		-0.276107	-0.331114		0.367714
MCM7	-0.26367			0.447888	0.440344					0.316017	0.329808	0.444455
XRCC6	-0.461508	-0.398884	0.464582	0.901641	0.80443	-0.456754	-0.41544	-0.481038	-0.271928	0.710028	0.324178	0.560522
SERPINA1	-0.399675	-0.297421	-0.530513	0.756188	0.684531	-0.408953	-0.344079	-0.266882	-0.27056	0.254447	1.11993	0.33078
CD9	-0.409683	-0.371966		0.304432	0.656647	-0.32237	-0.398049	-0.271067		0.262424	1.08804	0.51547
FDPS	-0.285669			0.279361	0.356055			-0.262685		0.40941	0.616277	0.32153
EPHX1	-0.305717	-0.28621	-0.306873	0.474338	0.536173		-0.262919	-0.327201			1.06572	0.406679
CAPZA1	-0.257888						0.692657
PSMD2	-0.397291			0.266625	0.703496	-0.377908	-0.33346	-0.371991		0.686127	0.316196	0.414043
LAMP1	-0.282361			0.514558	0.482513	-0.250785		-0.301762			0.967968	0.476624
PFN2	-0.256579		-0.315272	0.266159	0.390755			-0.263254		0.443739
TACSTD2	-0.408219	-0.426828			0.579263		-0.382861				1.31649	0.653727
BUB3	-0.260282		0.285127		0.35518					0.424104	0.339153
ATP5J2	-0.252363		-0.45775		0.453591			-0.384031		0.384321
HSPA8	-0.357319	-0.665259		0.438791	0.786848	-0.34124	-0.448462	-0.573283	-0.282315	0.858117	0.257634	0.75975
ATP1B1	-0.271795	-0.324287	0.801534	-0.622723	-0.389149		0.964735			-0.487891	0.415023	0.476396
PSMB2	-0.303317			0.407726	0.668438	-0.368991	-0.331845	-0.345993		0.707521
HNRNPF	-0.372153		0.325669	0.740157	0.641905	-0.292003	-0.315207	-0.351856		0.681649		0.347704
CD47	-0.258105				0.443254						0.882142	0.263791
SELT	-0.254875			0.400982	0.359007						0.496659
DNAJA1	-0.403168	-0.398892		0.627132	0.680577	-0.376102	-0.365086	-0.356335		0.847407		0.456708
HNRNPK	-0.297095	-0.300414	0.347562		0.617461	-0.308255	-0.299028	-0.271658		0.61673		0.487368
LMNA	-0.332621	-0.397038			0.593638	-0.44388	-0.319316	-0.333666		0.724738	0.447507	0.709306
ADK	-0.290931		-0.349042		0.569243	-0.286981		-0.323041		0.518997
SLC25A3	-0.253656	-0.307682		0.519631	0.663579	-0.260146	-0.287689	-0.369588		0.602718
CTNNB1	-0.302396	-0.279063	1.01311	-0.251953	-0.271867		1.0613					0.306835
CD59	-0.262029			0.302312	0.432363	-0.274624					0.694225
CCT6A	-0.300241	-0.258088		0.276862	0.637519	-0.304507	-0.275061	-0.293279		0.65912		0.33174
BRIX1	-0.345593			0.398299	0.538572	-0.326097	-0.295153	-0.413741		0.700765	0.406945	0.366856
UBE2N	-0.287404			0.291045	0.547621	-0.298942		-0.33537		0.599597
MRPL15	-0.282955			0.611002	0.56575	-0.278465		-0.297073		0.488653
SNRPD3	-0.331478			0.645257	0.643532	-0.329099	-0.338543	-0.46069		0.64176
SRSF7	-0.254965			0.525641	0.416316	-0.262763		-0.354364		0.485627	0.537195
TRIM16	-0.268395			0.426945	0.464739	-0.262214		-0.311447		0.483602	0.45694
LAMB3	-0.352828		-0.56172		0.477341	-0.367482	-0.327297				1.25275	0.739989
MGST3	-0.296195		-0.419755	0.328344	0.632406	-0.272377	-0.281275	-0.293042		0.434512	0.380839
SDHA	-0.281109		0.343085	0.393344	0.478538			-0.287581		0.449891	0.36953	0.591699
MYBL2		0.410446						-0.276069
CLSPN		0.304571	-0.263678					-0.262627
HELLS		0.270306		-0.286575							0.604954
PXMP2		0.301079
CTNNAL1		0.255266
RABL6		0.343957	-0.354601	-0.545969					0.273893
C19orf48		0.300942						-0.344806			0.312119
HIST2H2AC		0.281526
KRT19		-0.748483		0.413818	0.619712		-0.320583		-0.586333	0.599039		0.482845
MIR4435-1HG		0.263854
ACTG1		-0.501995		0.333522	0.396171					0.441996
SVIP		0.300224										-0.275906
LINC00152		0.359703	-0.277859					-0.327181
RPLP1		0.328287	-0.392759								-0.53978	-0.706231
TMEM54		0.29958	-0.391256		-0.252599						-0.376916
PPP1R14B		0.591	-0.967255	-0.741885	-0.821678				0.436725	-0.713103	-0.976499	-0.60229
BCL7C		0.320594	-0.368258	-0.266692							-0.27468
HNRNPAB		0.26252	-0.413172					-0.338024
METRN		0.410569		-0.362338	-0.38153				0.26913	-0.301592	-0.377518
MZT2B		0.360472	-0.445093	-0.496487	-0.396084				0.326649	-0.265019	-0.631971	-0.394649
DUS1L		0.295735	-0.318027		-0.286346					-0.351689
SRM		0.295856	-0.418948	-0.346809
ANAPC11		0.303826						-0.343715			-0.433422	-0.259575
UBE2M		0.288751	-0.344267		-0.334148						-0.401114
IMPA2		0.286488	-0.373594
LSM4		0.26214	-0.279391					-0.307646		0.251092
HES4		0.305684		-0.432089	-0.311952					-0.381142
CTDNEP1		0.287227	-0.279855		-0.317414				0.272015	-0.307232	-0.255143
MZT2A		0.262535	-0.398055								-0.278166
RPS21		0.270785	-0.447082								-0.39788	-0.371144
BRI3		0.419319	-0.401418	-0.516255	-0.603447				0.360213	-0.545249	-0.817166	-0.622925
NENF		0.278975	-0.507886									-0.442155
C17orf89		0.354468	-0.513506					-0.444748				-0.321819
POLR2I		0.291385	-0.555151					-0.274351			-0.365921	-0.422806
ITGB1BP1		0.315421	-0.319084	0.314599				-0.37366			-0.30615	-0.440217
RPS20		0.342287	-0.619082					-0.382373			-0.398985	-0.68433
ATP5E		0.312619									-0.654506	-0.66793
SPATS2L		0.378811	-0.735923	-0.427264				-0.346594	0.430895
SLC25A39		0.255044	-0.442569	0.42007				-0.276474
PDCD5		0.340947	-0.306626					-0.341238				-0.357092
BOLA3		0.304421		-0.326569				-0.277608			-0.273381	-0.514093
PMEPA1		0.284531		-0.402582	-0.300574	-0.265022				-0.325705
POLR2J		0.257062	-0.271984									-0.40986
TMA7		0.366667						-0.261096			-0.48812	-0.563738
NPM1		-0.458039		0.592202	0.579755	-0.259795		-0.474403	-0.348018	0.621443
MRP63		0.252402	-0.270444	-0.555773							-0.268789	-0.270519
GUK1		0.335248	-0.267958					-0.282168			-0.317521	-0.549089
MYH9		0.277095	-0.260209									0.385276
PRELID1		0.291134	-0.275069					-0.475118			-0.328575	-0.40529
EIF3E		-0.4491		0.267752	0.314642				-0.303431	0.334425
KRT8		-0.399234	0.276711		0.2772				-0.36296	0.458088		0.360413
NME4		0.339083	-0.739824	0.340832				-0.327085				-0.369613
C19orf33		0.271847	-0.602505	0.421892	0.258514	-0.306612		-0.350961				-0.450964
UPP1		0.250685		-0.258179	-0.309606	-0.325415					-0.447559
RPL5		-0.259267		0.250225							-0.322476	-0.279749
LDHB		-0.393409		0.470252	0.395113				-0.258965	0.46295		0.265885
UQCRQ		0.261869	-0.296103					-0.422295			-0.32844	-0.503371
GTF3A		0.258908	-0.443838					-0.285345			-0.330336	-0.485601
PFN1		0.266693	-0.252573							0.275054	-0.407629	-0.295512
CALM2		-0.423725	0.885145	0.252645	0.425394	-0.371195				0.499145		0.327894
GPX1		0.266844	-0.441172								-0.285927	-0.41491
YWHAZ		0.282403	-0.582786
ILF2		-0.427321	0.643054	0.42755	0.491578	-0.252144	-0.276674			0.547915		0.428941
OST4		0.261293		-0.283657							-0.581683	-0.63256
MAL2		0.250594		-0.648113	-0.397804					-0.359561	-0.537496	-0.338069
MT2A		0.353837		-0.463725	-0.482532	-0.66642		0.456967	0.256549	-0.39581	-0.605114	-0.349378
PSMD4		-0.374768	0.532474						-0.318722			0.313768
CD63		-0.347785			0.352284				-0.265439		0.806097	0.488359
TKT		-0.393558							-0.343417			0.38099
KRT7		-0.368459		0.427729	0.636694	-0.628982	-0.348029		-0.31257	0.722419		0.45002
HSPA5		-0.791834	0.506853	-0.434864	-0.57041	-0.291674		0.270844	-0.667481	-0.977366	0.3876	1.9974
ATP5B		-0.423569			0.509739				-0.250639	0.498404		0.498562
PPIB		-0.413541							-0.473468		0.574164	0.589258
PSME1		-0.354287		0.309103	0.439775					0.508724
PSMB5		-0.346175	0.253717	0.401607	0.508503		-0.254039		-0.256002	0.596589
PDIA6		-0.432001	0.341078						-0.297327	-0.408267	0.644797	0.936592
PSMB1		-0.361638	0.365056		0.386116				-0.256274	0.448515		0.255218
SLC16A3		-0.433234							-0.297745	-0.348527	0.700293	0.868649
PDIA3		-0.522911							-0.468511	-0.281159	0.809302	1.25649
HSPD1		-0.391904	0.316822	0.479346	0.527137		-0.268819	-0.25289	-0.299899	0.487957		0.502139
MYL12A		-0.307677	0.386312	0.509842	0.434687	-0.285735	-0.25375			0.507913	0.268365
SSR2		-0.322962	0.379715					0.280473		-0.409296	0.337732
BPIFA2		-0.375597	0.400179	-0.746702	-0.787532	0.870926		0.595306		-0.746642	-0.758181
UBB		-0.286216		0.516943	0.554599		-0.282358			0.497931
SQSTM1		-0.31119	0.48077		0.32268				-0.343801	0.382439		0.463377
ATP5A1		-0.389977		0.430814	0.439933					0.524886		0.407251
CALR		-0.343157								-0.382151	0.746186	0.763881
HLA-A		-0.440589			0.313465				-0.266924		0.906967	0.967698
EPCAM		-0.459313		0.357722	0.556832	-0.2673	-0.346263		-0.374195		1.06166	0.762528
CLDN10		-0.309045	0.283177	-0.480707	-0.468113	0.659403				-0.470188	-0.27685
CCPG1		-0.284117		-0.490109	-0.616731	0.295425		0.286368		-0.600945	-0.365978	0.901341
SPINT2		-0.254662		0.319875	0.44322	-0.288809					1.00504	0.434543
TMBIM6		-0.348384			0.280334						0.976741	0.761913
COPE		-0.328632	0.548699						-0.25586		-0.267953
DAD1		-0.25249			0.486689	-0.322368					0.812299
LGALS3BP		-0.381885		0.262491					-0.369896	-0.251775	0.610559	1.02638
TMED9		-0.349494		0.449575					-0.252965		0.729561	0.764543
G6PD		-0.365254	0.318623	0.277184	0.337551				-0.317484	0.528442		0.496113
NQO1		-0.481461	0.309238	0.487334	0.622889	-0.278619	-0.274323	-0.523494	-0.380698	0.602997		0.446302
SPCS2		-0.380332	0.431731		0.382481				-0.253353		0.915065	0.655923
EAPP		-0.260049	0.601494								-0.331551
PSME2		-0.29036		0.356741	0.561894	-0.308182	-0.279502	-0.306298		0.571539
ERP44		-0.258351									0.364944	0.360379
EIF3M		-0.2748	0.402798								-0.253003
TFF3		-0.508003	0.259282	-0.972339	-1.02753	1.43482		0.418344	-0.555096	-0.977917	-0.980894	-0.400369
EIF3D		-0.291327	0.50156						-0.265462			0.318368
PPA1		-0.307182	0.282976	0.497629	0.334968					0.390693
SAT1		-0.405897	0.56073	-1.11838	-1.42941	0.435733		1.15452	-0.371141	-1.32127
MDH2		-0.252839									-0.267149
PSMC4		-0.359265	0.45294	0.391971	0.404772				-0.260343	0.37298		0.361816
EIF4A2		-0.276271	0.562854	-0.354202	-0.327229					-0.378439	0.296033	0.341884
EIF3I		-0.387208		0.557298	0.64319	-0.331358	-0.275151	-0.254495	-0.300648	0.69871
HLA-C		-0.426868		0.308581	0.452984		-0.275297		-0.294834		0.930441	0.923118
CYBA		-0.265645	0.34589	-0.422357	-0.434479	0.306444		0.433955	-0.393536	-0.705716		0.291476
ECH1		-0.301094										0.270295
IMPDH2		-0.305055		0.413833	0.343393				-0.258738	0.453882		0.255891
TMED10		-0.291974	0.4237							-0.327739	0.601452	0.4186
PSAP		-0.322246	0.908881	-0.951638	-0.602309			0.320029	-0.273575	-0.927399		1.13341
DDX5		-0.33049	0.508894						-0.255816	0.352616	0.73961	0.893957
ELF3		-0.271425	0.612543	-0.455725	-0.439246	0.315333				-0.354708	0.924678	0.506944
SRP54		-0.291866	0.742935									0.768257
DDOST		-0.262395							-0.265185		0.474587	0.573339
PSMB7		-0.268916		0.352782	0.46978					0.605496
CLDN7		-0.31784			0.289054				-0.335957		0.867776	0.581397
DNAJB11		-0.257645		-0.288069				0.253168		-0.309763	0.513852	0.551552
CCT3		-0.336766			0.478708					0.467754	0.343754	0.455177
WFDC2		-0.310554	0.468396	-0.888886	-0.757848	0.711101		0.316189	-0.287634	-0.745325	-0.487217
CCT4		-0.305146	0.374717	0.318407	0.403224					0.520438		0.467401
TUFM		-0.290091			0.440054				-0.282502		0.606873	0.57868
RAB1A		-0.268218	0.617335							0.283547		0.256144
HSPA9		-0.303031	0.474905							0.346915		0.712131
MORF4L2		-0.303674	0.455666	0.321452	0.36478					0.413781		0.282551
PDIA4		-0.280576	0.324388								0.641787	0.913332
PSMA1		-0.299846	0.297871		0.580983	-0.253936				0.541951
SLPI		-0.369724		-0.562038	-0.505333	0.974715		0.479136	-0.447849	-0.704674
UQCRC2		-0.256328			0.286645					0.27593
RPN2		-0.294093		0.256311	0.278794						0.58269	0.903715
PSMA5		-0.263713		0.391901	0.640609	-0.2989	-0.279383	-0.293889		0.562508
VCP		-0.252407		0.369701	0.351517					0.373488		0.536761
MALAT1		-0.417086	0.919603	-1.84937	-1.86863				-0.312274	-2.36341	2.05887	1.02478
SDCBP		-0.270011	0.511381	0.358006	0.414745					0.487713
APEX1		-0.255904		0.589829	0.508831					0.53487		0.267139
PSMC1		-0.32683	0.314528	0.508499	0.521911	-0.259792	-0.25964			0.647438		0.337549
ITM2B		-0.270546		0.449097	0.386433						0.868332	0.431214
CCT7		-0.290692			0.480959					0.569388		0.496711
LAPTM4A		-0.293452			0.431281						0.957077	0.506504
CCT2		-0.295192		0.294514	0.539596	-0.275637		-0.269305		0.60823		0.408555
LSM2			-0.752193		0.344857			-0.410818		0.36679		-0.360811
MT-CO3			-0.91149							-1.06254		0.804467
MT-CYB			-0.848528							-1.13116		0.761844
KIF5B			-0.473586									0.352879
TXNL4A			-0.375788	-0.390343	-0.343895						-0.426116	-0.332376
MEA1			-0.531336								-0.330862
ATP6V0E1			-0.54259		0.409758					0.275682	0.464796
SRRM2			-0.464914		-0.263158						0.313609	0.355958
MGLL			-0.399687	-0.297099		-0.289629
MT-ND4			-0.813329	0.288226				-0.257988		-1.04052		0.7507
RALBP1			-0.437957						0.350992		-0.314096
MRPL11			-0.534199		0.304464			-0.460666		0.385805		-0.265504
UBL5			-0.293224	0.321405								-0.328348
MT-CO1			-0.721332							-1.28625		0.966985
C1orf122			-0.375924	-0.355606							-0.257824
MTDH			-0.369561							-0.311172	0.565992
APOPT1			-0.368132
MMP24-AS1			-0.453003	-0.412224	-0.334788			0.257256			-0.335745
ZDHHC12			-0.550438
FIS1			-0.504842	0.386664							-0.343768
CALM3			-0.558893	0.308743	0.290556			-0.373243	0.283811	0.321477
AES			-0.282704								-0.372464
TMEM167A			-0.450867					-0.396562
DNPH1			-0.369583
TAF10			-0.395703	-0.67792	-0.542184					-0.404512	-0.575259	-0.419227
POLD2			-0.456039
TPD52L1			-0.407539
SHARPIN			-0.409702
PABPN1			-0.264141		-0.400343					-0.293249	0.585433
VMP1			-0.276635	-0.308721	-0.382175					-0.523354	1.70179	0.729664
DNAJC21			-0.303303
SSNA1			-0.408164
COA4			-0.376226									-0.255972
MRPS12			-0.35359	0.476049				-0.282216				-0.308114
FAM49B			-0.255766	0.445794				-0.264742			0.738267
PDLIM1			-0.274063	0.34269	0.535593			-0.305349		0.626666
ODC1			-0.306977		0.266015			-0.290126		0.269905
MRPS36			-0.322568
LAPTM4B			-0.442903								0.416776
DPY30			-0.426586		0.283916					0.473246
C7orf73			-0.545632									-0.25666
HTATIP2			-0.436894	0.317618	0.292069					0.266938	0.309976
STRAP			-0.342667	0.254961	0.427643					0.436002
COX20			-0.3982					-0.271118	0.250221			-0.331336
MT-CO2			-0.83792					-0.277858		-1.15234		0.670569
PAWR			-0.322909								0.522735	0.258175
HDDC2			-0.276262
C11orf73			-0.344271
EMC6			-0.322466
RWDD1			-0.356532								-0.311015	-0.334893
CHCHD10			-0.387736								-0.294871	-0.260079
SLC39A4			-0.679814		0.296387	-0.293515		-0.472668		0.348329
SPCS3			-0.311378								0.459588
LAGE3			-0.301421								-0.302061	-0.355989
GTF3C6			-0.311548
MT-ND5			-0.622737	0.413778	0.261895			-0.331033		-0.711062		0.577015
BLOC1S1			-0.528489					-0.376905		0.320032		-0.262118
MRPL27			-0.407061	0.283803	0.308683			-0.291647		0.33102
DDX21			-0.257117									0.335613
RNASEH2C			-0.317511		0.25755			-0.430231				-0.314548
MRPL43			-0.309181
DCUN1D5			-0.485238	0.516604	0.498311			-0.308295		0.585757
CISD3			-0.357661								-0.297765
MLLT4			-0.349826		-0.311609
NSA2			-0.425715							0.281636
C9orf142			-0.30206								0.310247
RHOBTB3			-0.285823	-0.295564							0.283593
COX14			-0.338207								-0.362757
TMEM256			-0.366579									-0.274182
RABAC1			-0.456251								0.366084
CUTA			-0.329712		0.271441						0.293919
TCEA2			-0.297523	-0.331522	-0.288514					-0.275489
PYURF			-0.342552
MINOS1			-0.390389
TSR3			-0.285078	-0.291666	-0.303999				0.25226	-0.259099	-0.374741
VOPP1			-0.492215	0.488178							0.28886
DBI			-0.391585		0.366175			-0.348575		0.272932		-0.340387
ATP5F1			-0.288836		0.434076					0.377875
C7orf50			-0.365354	0.298659
STUB1			-0.364289
PRKDC			-0.45279									0.263265
PSENEN			-0.357004	0.260619	0.302305						0.598704
ZCRB1			-0.260439								-0.420752	-0.325202
TMEM160			-0.253023					-0.313019
ATOX1			-0.43638					-0.355544		0.254021		-0.343648
POLR2F			-0.320538								-0.365624	-0.255004
ST13			-0.33295	0.531326	0.37113					0.489464
TRAPPC1			-0.376612		0.261314
ACTN4			-0.261029					-0.262047				0.334561
SLC2A4RG			-0.347041
MRPS34			-0.31232	0.296128	0.376706					0.343265
ATP2A2			-0.370143							-0.307743	0.319212	0.45053
RSF1			-0.254589									0.319771
USMG5			-0.479146									-0.404813
ANAPC15			-0.608334	0.268558	0.302009			-0.358079
CBX5			-0.39469							0.288572
CWC15			-0.325592		0.377577			-0.364288		0.35307
NDUFB5			-0.30964	0.302763						0.344138
DPM2			-0.276532
HDGF			-0.301294	-0.263212					0.369194
MRGBP			-0.271903
ATP2B1			-0.354828	-0.442366							0.672285	0.343236
TNIP1			-0.300623		0.357345			-0.339217		0.313233
TGOLN2			-0.305401								0.569898	0.28803
LYRM4			-0.266501								-0.285473
MAP1B			-0.27302					-0.297256		0.396665		0.634302
CDC42EP3			-0.340965								0.559213
C4orf48			-0.32677	-0.291861								-0.332735
RPS27L			-0.25367	0.335534	0.286711					0.372262
FAM96A			-0.305817
PLA2G16			-0.27035
C4orf3			-0.308215							0.308338
CALU			-0.304118	0.289238							0.859342	0.513496
MCUR1			-0.280808	0.358488
PHB			-0.291563	0.621714	0.497233			-0.372717		0.511117
UBE2K			-0.431419							0.281192
MKKS			-0.310565								-0.352418	-0.309385
CTHRC1			-0.320393	0.277613							0.389165
CBX1			-0.272226
YWHAB			-0.25314		0.268985					0.368821
GNG5			-0.480041					-0.298017			-0.256538	-0.281946
TOMM22			-0.254172	0.373083	0.328685			-0.34903		0.445937
OXLD1			-0.289677
EXOSC4			-0.252772
NDUFS5			-0.362328	0.362373	0.456322			-0.395824		0.43289
SUCLG1			-0.289218	0.412989	0.297052					0.348036
GMPR2			-0.27943
NAA38			-0.360389							0.258193	0.345021
ERCC1			-0.283669
BLOC1S2			-0.2992
MAPKAP1			-0.289684
SRCAP			-0.391918		0.269765
THOC7			-0.257951	0.495253	0.402631			-0.282753		0.490354
TMEM126B			-0.405169		0.316683			-0.284018		0.438793
RPS2			-0.352543								-0.733709	-0.655723
FUNDC2			-0.351744
IRAK1			-0.376432
DSG2			-0.310897							-0.29334	0.314524	0.327603
RABGGTB			-0.359232
GRINA			-0.291267
TAF9			-0.308009	0.541721	0.357783			-0.43454		0.375352
MRPL14			-0.327578								-0.250781	-0.307025
COA6			-0.306394	0.471567	0.327177			-0.345555
SRSF9			-0.309462								-0.270475
ANAPC5			-0.296936								0.29155
FAM89B			-0.272317	-0.459392	-0.292803						-0.357669	-0.26484
HRAS			-0.335615
RNF167			-0.26592								0.27302
RNASEH2B			-0.280626
LAMTOR4			-0.287492
SPATS2			-0.302173
TMEM203			-0.252057
NTAN1			-0.354589
NDUFB4			-0.319751		0.27279			-0.285871		0.274214
GCSH			-0.375476	0.278938				-0.285684		0.3148
SLTM			-0.262806									0.278343
URI1			-0.279753
NQO2			-0.283407	0.356116	0.261155					0.250037
UBE2E2			-0.325258	0.29163
MRPL21			-0.261594
NDUFS6			-0.486153	0.518178	0.397464			-0.615323		0.432371
ZCCHC17			-0.258403
C8orf59			-0.357206					-0.270328
NGFRAP1			-0.388723	0.299896	0.314022					0.288246
NHP2L1			-0.295479	0.285421	0.251935			-0.404708		0.330817
SMIM12			-0.339265
FLNB			-0.38929								0.493646	0.306192
NDUFS8			-0.372759
AKT1S1			-0.328425							0.311313
UQCR10			-0.439375					-0.332945		0.268004	-0.260022	-0.378672
SLC25A1			-0.301431
MRPS15			-0.274982	0.312157				-0.252455		0.305272		-0.312418
TSKU			-0.371106								0.28529
TRIM28			-0.26726									0.350774
TRIO			-0.27992	-0.258745								0.254475
ARPC1A			-0.272583	0.303583	0.281972			-0.289811		0.380291	-0.293673	-0.374998
CTNNA1			0.278161									0.584388
DGCR6L			-0.252189
LY6K			-0.254401
NDUFA2			-0.262382					-0.400662
MBOAT2			-0.317777	0.294605							0.270886
MIF			-0.494991								-0.300632	-0.509074
TEN1			-0.284335
RPS26			-0.568694	0.309203	0.263575			-0.46646		0.318694		-0.476926
VCL			-0.264456								0.540937
DHX29			-0.32488
ABT1			-0.34448
ARL6IP4			-0.3916									-0.298033
PTPRF			-0.256732							-0.261341	0.417249	0.262074
DR1			-0.280784	0.266289
PTP4A2			-0.317797	-0.467311	-0.503498					-0.467208	-0.583788
FAM120AOS			-0.261038
MRPS28			-0.423699	0.315676	0.381372			-0.268528		0.350829	0.481284
PABPC4			-0.283918	0.292037	0.259289					0.251063
NUDT2			-0.267576
POPDC3			-0.376704
S100A4			-0.314792	0.399019	0.420109			-0.311494		0.462356
SPANXD			-0.317434							0.33537
RAB32			-0.370848
FADS1			-0.285049								0.461836
PPP6C			-0.250521
EIF2AK4			-0.259697
DESI2			-0.276195
RHOD			-0.459844		0.250574	-0.272264				0.341614
AMZ2			0.270378
RFC1			-0.284159
WRB			-0.26499
ABHD11			-0.302963							0.26043	0.409248
LAMA5			0.267401	-0.435555	-0.450674					-0.483656	0.681482	0.638981
PNISR			0.353171	-0.520603	-0.317937					-0.333705	0.834897	0.429661
BAZ1B			-0.266511
SNRPB2			0.279968	0.368428	0.36819					0.271075		0.349841
NHP2			-0.258623					-0.322458			-0.263364	-0.33264
DDR1			-0.267789								0.334788	0.368463
MRPL51			-0.265671	0.331542	0.403803			-0.430551		0.370199
PHF19			-0.448905	0.348643				-0.369876	0.416295
MRPS25			-0.270523
C5orf24			0.257257
FBXO32			-0.35161		0.385182					0.470219
GAPDH			-0.314472	0.430636	0.423331			-0.266077		0.469781		-0.256963
CHPT1			-0.254704	-0.268021
C3orf14			-0.288704
MRPS26			0.295176
AURKAIP1			-0.291129								-0.42374
TGIF1			0.291364	-0.400288
SHFM1			-0.27497					-0.358577		0.285203	-0.26532	-0.333652
ID3			-0.418504	0.362742	0.310977			-0.275033		0.346176	0.327245
COX6A1			-0.277551	0.305425	0.374379							0.350624
C16orf74			-0.325659
RPL28			-0.328489								-0.488652	-0.611232
PSMC3			0.363421	0.473389	0.557981	-0.304932	-0.28584			0.531563		0.384972
ILK			0.293241	0.320164
MARCKS			0.390232	-0.299539	-0.334718						-0.262292	0.303319
PEX2			-0.250975	0.266066
2021-09-07			0.316243	0.2961	0.376078					0.475563		0.398758
RHOF			0.279212				0.267258				-0.344916
LY6D			-0.258704								0.298984
DNAJC10			0.36949
MRPL52			-0.345132								-0.323703	-0.27239
DNAJB1			0.29594
H3F3A			-0.379331	0.50191	0.386861					0.437771
EWSR1			0.278737	0.312045	0.251266					0.348098	0.314376	0.443639
SF3B4			0.388639	0.545918	0.314844					0.482224
RAB6A			0.392349
PALLD			-0.317121
COPS6			0.260547		0.341163					0.422775		0.271434
TRIM16L			-0.368568	0.334535	0.364212			-0.360035		0.519394
USP40			-0.401133	-0.295163				-0.294696
RPL37			-0.31176								-0.404262	-0.608646
CMC2			-0.2666
HNRNPH3			0.315679							0.262969		0.323061
VIMP			0.444623							-0.340866
RPL30			-0.409937	0.269043						0.308417		-0.464861
IPO7			0.271704
NEK6			-0.329208	0.349398	0.298389					0.303334
SH3BGRL3			-0.315831								-0.461011	-0.525237
2021-09-02			0.357743									0.298906
EGFR			-0.273993								0.438573	0.271049
SEC63			0.283588		-0.348322					-0.312087		0.270478
EIF4E2			0.340664
CHCHD7			0.304819	0.307636
IER2			0.458453								0.617185	0.29939
N4BP2L2			0.36917	-0.40279	-0.350745						0.758848	0.670066
NSRP1			0.277477
BIN1			-0.255369
CYB561			0.286837
ARGLU1			0.349788								0.623234	0.272272
PAFAH1B2			0.331746
CLDND1			0.258957								0.271134
SF3B5			0.252786								-0.388715	-0.271653
XRCC5			0.362725	0.285596	0.345304					0.464995		0.396528
PPP4C			0.273842		0.319102					0.358793
TAF7			0.458185								0.313286	0.30202
MCTS1			0.275674	0.521302	0.493109					0.366638
WDR43			0.352593									0.255495
ITM2C			0.362006	-0.255877
NUDT15			-0.270783		0.283951					0.349279
AHSA1			0.269646	0.37656	0.27024					0.436442
SDF4			0.283329
VARS			-0.255272	0.4249								0.253979
IK			0.326375									0.335541
CHMP5			0.355706	0.411158						0.310507
BZW1			0.318716	0.511669	0.324377					0.40316		0.260096
STRN3			0.338114	-0.411889	-0.414347		0.413355			-0.317178	-0.263282
RPSA			-0.320478								-0.292897	-0.440371
CHID1			0.256428							-0.293605
EIF1B			0.291332		0.257665					0.25107
PRKAR1A			0.408785
SLC1A5			0.414936								0.385522	0.589956
GARS			0.288118									0.426492
PAIP2			0.341595	-0.302375						0.253886
AP1S1			0.298333	0.332182
PSAT1			0.406151	0.265182
WBP2			0.385851
PSMA7			-0.419482		0.42635					0.392275
CLPP			0.373209
ARF4			0.264392	0.467166	0.342337					0.500805		0.293255
DAZAP2			0.418873
PAFAH1B1			0.257977
SPANXC			-0.256217		0.280812			-0.26981
AGRN			0.251804							-0.297657		0.400136
NDUFS3			0.289852	0.345753						0.257362
DDX17			0.253031		-0.340652						0.271423
AHCY			0.255112
XBP1			0.337076							-0.272809	0.373093	0.342072
EIF4E			0.312319	0.602241	0.383514					0.397502
IFT43			0.257478
HDLBP			0.349101	-0.457865	-0.261645						-0.312699
CDKN1A			0.375068	-0.405008
DYNLRB1			0.281573	-0.322669
HOOK2			0.299795	-0.271149	-0.31798						0.970528	0.371783
CHTOP			0.404015									0.274828
BTF3L4			0.487518
MBIP			0.488319
MRPL10			0.287208
BABAM1			0.258424
ZFAND5			0.459672		-0.263245						-0.307285
GHITM			0.324036		0.325124					0.412201
PSMF1			0.366422
RND3			0.621803	-0.298955							0.842642
MBP			0.258258
C19orf70			0.314138	-0.344822
PPP1R7			0.280305
CCND3			-0.251146	0.364424	0.306804					0.387162
TPM3			0.261502	0.427492	0.334764					0.299194
CLIC4			0.33875
RPF2			0.353312
SETD5			0.287576
DRAM2			0.298321
ELAVL1			0.290734
RBBP4			0.424459								0.507004
BATF			-0.331663		0.26681			-0.309223		0.258851
S100A11			0.362603								-0.452154
TNFRSF12A			-0.302017			-0.298059					0.7441
CHCHD2			-0.351609	0.361842	0.297502			-0.409817		0.281946	-0.279279	-0.320216
ACTR3			0.382598		0.364762					0.389419		0.275414
AIMP2			0.266685
RPS12			-0.257302	-0.277625	-0.311676					-0.321021	-0.799261	-0.855357
SIAH2			0.253515
NANS			0.422414	-0.401267
HDAC2			0.426571								-0.277049	0.368765
LGALS1			-0.252437	0.328898	0.352056	-0.65011		-0.407689	0.289661	0.425597		-0.33615
WDR66			0.251422	-0.262025
VBP1			0.260842	0.383191	0.366473					0.359045
VPS72			0.433199
BSG			0.307602							-0.296474	0.448105	0.482026
TCEAL4			0.422858
EIF6			0.260141		0.292268					0.404507
PUSL1			0.26752
H2AFJ			0.274332
ANXA11			0.373575					0.29518				0.270566
CBX6			0.336019	-0.28203			0.659158
PLSCR1			0.440239
DCAF11			0.424253
QSOX1			0.361385							-0.309373	0.430759	0.688638
SCFD1			0.382669
MED8			0.263484	0.431914						0.303638
GTF2F1			0.253679
ATP6V1E1			0.398795		0.273829					0.379145
ZFAND1			0.424553
DYNC1I2			0.406085
IMMT			0.257479	0.350715						0.26358		0.297759
ADAM17			0.345963	-0.25494			0.34403				0.28758	0.309348
CUEDC2			0.257078
ACTR1A			0.261874
TATDN1			0.465724
RPL7A			-0.264698								-0.450365	-0.310628
PSMD6			0.366887							0.364035		0.253082
IAH1			0.353952				0.30608
SNRNP40			0.312734	0.483424	0.359709					0.362702
ARL1			0.25373
SAR1A			0.267131	0.296558							0.330985
COPB2			0.375051									0.421943
NDUFS2			0.295712	0.312444	0.278217					0.324343		0.421254
ARFRP1			0.307446
CASP4			0.307131
BBC3			0.268016	-0.383967	-0.277426
SNRNP27			0.256877
ASCC2			0.292891
ST3GAL4			0.275051	-0.267218
HNRNPDL			0.263277								0.453677	0.302374
CCNC			0.453602
ACTR10			0.267578	0.368399						0.259067		0.261162
TNNI3			0.439324	-0.273667
GMPS			0.28387	0.306763
WTAP			0.335424	-0.471337			0.406806
LARP6			0.426991	-0.463009	-0.47429			0.292602		-0.437275	-0.362026
ACP6			0.358494	-0.262072
TIMP1			0.252317	-0.474751					-0.255447	-0.322442
TMEM125			0.251015
KIAA1191			0.298434
SPINT1			0.300027							-0.301013	0.78314	0.596554
SDHD			0.285149							0.291998
ANXA7			0.323718	0.255159	0.250748					0.452248		0.346577
SMARCA5			0.374646									0.308108
BZW2			0.356812	0.268167
SNX27			0.30624	-0.408949	-0.364952					-0.252525
BEX2			0.270755		-0.38053			0.300051		-0.319505	-0.35671
NUDT4			0.331681
RSRC2			0.428329
SELK			0.316905
TPT1			-0.255248								-0.665467	-0.63456
PRCC			0.278025
TSG101			0.355922
TRA2B			0.296045	-0.289002							0.439608
NDUFS4			0.33627							0.325309
HINT1			-0.266227					-0.357699			-0.294499	-0.38176
HES1			0.340636	-0.302205	-0.350028					-0.275311	1.18633
TMC6			0.258026
ATXN7L3B			0.364923
CBS			0.274815
CHP1			0.372119				0.416813
OGFR			0.369128
IDH1			0.290144
RAB5A			0.256956
ISG20			0.39957	-0.27748	-0.428414	0.363848		0.340099		-0.424049	-0.413333
EZR			0.48197									0.525765
ZFPL1			0.444791
PRSS22			0.286357	-0.369768				0.35546		-0.324793	0.409365	0.45813
HNRNPR			0.468861	0.45323								0.45129
RPP25L			0.304996
TCEA1			0.31829	-0.265532							-0.390247
GFPT1			0.279074									0.300461
RMND5B			0.254644
PFDN4			0.343855								-0.264582
RPL9			-0.26618	0.320821							-0.286588	-0.431656
WDR18			0.421932
GPCPD1			0.328949	-0.324546	-0.327365			0.321565		-0.322638	-0.315295
ATP6V0B			0.358606								0.357031
TMEM30A			0.401937							-0.255558		0.426156
PRMT5			0.397344							0.342564		0.275482
SERP1			0.334973	-0.507568	-0.451067			0.251492		-0.33592
ASNS			0.296464									0.402655
SHMT2			0.429292
DNTTIP1			0.416684
RAB8A			0.28661
RNF26			0.350709
NFKBIZ			0.268773	-0.29247	-0.27995			0.256317		-0.270989		0.330653
ZNHIT3			0.431128
TRAPPC4			0.342846
MFSD3			0.337213								0.288578
DHX9			0.375012									0.285748
GALE			0.430694	-0.312105								0.367013
GPBP1L1			0.269337
BIK			0.514421
GNL1			0.328571	0.465246
TSPAN1			0.351283					0.283816		-0.276561		0.25467
JUNB			0.533261									0.289977
DUSP6			0.414842	-0.529799	-0.556127			0.319617		-0.503888	-0.380056	0.367996
PPP1CB			0.53238				0.869576				-0.296146
ARMCX3			0.357013
LYRM1			0.315328
CIR1			0.271004
TM7SF2			0.251784
ITGA2			0.262892	-0.324488	-0.3367					-0.298707		0.324804
SUPT4H1			0.52195
EIF2S3			0.411151				0.48209
HADHB			0.448742
SOX4			0.416217	-0.706487	-0.667721		0.41625	0.320898		-0.456892
PIGH			0.341833
NMD3			0.32756
SPSB3			0.335811
WARS			0.429921		-0.518378	0.429087			-0.26641	-0.451849	-0.468215	0.278746
PLEKHB2			0.305688
PPID			0.254433
CHPF			0.308003
TRIB3			0.377852		-0.641985			0.396069		-0.538107	-0.729846
AKIRIN2			0.410387
ITFG3			0.315053
CDC40			0.297985
TMEM87A			0.392733								0.442982
ATP6V1G1			0.361587					0.31051			-0.307692
IRF7			0.296719
TNFRSF18			0.312114
SH3KBP1			0.541018					0.42193			-0.28548
ALKBH2			0.299709
SF3B1			0.290106									0.409516
OSTC			0.338723
C12orf57			0.3557	-0.446408	-0.363905			0.28476			-0.661568
CCT8			0.606852		0.257155					0.335344		0.387648
CXCL1			0.337933					-0.38138			0.451291	0.437355
FRG1			0.279058	0.269654
PDXDC1			0.3108
TPM4			0.314678								-0.318471
CCNL2			0.258855
SP100			0.447319
EHF			0.334046
NFATC3			0.405314
THAP9-AS1			0.355844
NKX2-8			0.420996					0.255954
SELENBP1			0.315657		-0.282563	0.327533		0.375193		-0.279703	-0.277726
OAT			0.584214									0.46623
SLC39A3			0.302723
SCARB2			0.278964									0.264304
AATF			0.262652	0.373411
CXCL3			0.476048								0.481246	0.430782
RNF181			0.35708								-0.290975	0.272331
WDR46			0.278681		0.296682					0.355004		0.270063
ZFP36L2			0.446671
MACROD1			0.552905
MT1X			0.446006	-0.346379	-0.583527			0.521367		-0.487744	-0.770402
SDC4			0.426552	-0.608932	-0.467703		0.783187			-0.463121		0.292754
SLC9A3R1			0.347851
CYB5R4			0.415074
BTG1			0.368197	-0.466753	-0.473214			0.35529		-0.435041
MIPOL1			0.260117
SLCO4A1			0.502889	-0.296607	-0.318531			0.25651		-0.308805		0.422799
SETDB1			0.314251									0.254794
CTTN			0.712335	-0.733646	-0.825654		1.02963			-0.562613	-0.644022
RQCD1			0.326431				0.278692
TNFAIP8			0.270697
CXCL2			0.380537								0.830378	0.294991
SAA1			0.263821	-0.511634	-0.573222			0.752752		-0.71389	-0.361975
PCK2			0.306865									0.381163
CDC42			0.672513				0.644412
NEAT1			0.280349	-1.33291	-1.73746	0.379901			-0.425172	-2.11299	1.68598	0.80241
NUP37			0.290995	0.35767	0.410697					0.515502
ATP6AP2			0.271462								0.502436	0.325266
DHX15			0.257206	0.406815
MYADM			0.44666				0.281251
C12orf39			0.466835	-0.332819	-0.355667					-0.325144	-0.339013
PRDX2			0.406049
SCNM1			0.404059	-0.317609	-0.364492			0.294807		-0.388905	0.346089
IL8			0.36222					0.349358	-0.488291	-0.271524	0.826783	0.471595
TMEM120B			0.587423				0.46497
RAE1			0.292744
MCL1			0.34325	-0.525671	-0.485952			0.359006		-0.359912	0.271664	0.499843
RP11-841O20.2			0.600632	-0.303884			0.496731
SOX11			0.350792				0.399108
APP			0.647614	-0.311274	-0.283362			0.285419		-0.506132		0.885628
PHGDH			0.376083	0.274364	0.270973					0.408803		0.33834
CARS			0.718367									0.387953
C19orf10			0.307097	-0.426096	-0.29841			0.279584		-0.611393		0.40228
GLTSCR2			0.263979	-0.261685							-0.39072
STRA6			0.380889									0.264499
BCL10			0.44782
GCHFR			0.419416	-0.688573	-0.698564	0.379374		0.337763		-0.672683	-0.671316
PMPCA			0.354646		0.259924						0.328006
ANKRD36C			0.839507	-0.320865	-0.346969			0.28158		-0.330342		0.546501
NIT1			0.420328
HNRNPH1			0.706575				0.786382				0.256611
DHRS3			0.514606	-0.487063	-0.483168		0.382671	0.272076		-0.46493	-0.393994
EIF3L			0.277323	-0.584329	-0.25772						-0.293064
SARS			0.616692		-0.307633						-0.400173	0.297432
CCL20			0.645356		-0.322008	0.270951		0.307488	-0.30267	-0.35598		0.553926
NPC2			0.35725							-0.269879	0.457202
SEC61G			0.289293	0.412696							-0.31137
NTHL1			0.490946	-0.420977	-0.456575			0.464304		-0.331228	-0.545752
CRABP2			0.568883					0.434646			-0.537652
ADIRF			0.548941	-0.392273	-0.437449					-0.404502	-0.388912
H1F0			0.621537	-0.848851	-0.714284					-0.635906	-0.453112
SLC25A6			0.513976	-0.880972	-0.686107			0.871164		-0.735062	-0.960563	-0.303088
MTHFD2			0.665993	-0.354373	-0.2852						-0.497399
C8orf4			0.733098		-0.264895			0.28207
PRDX5			0.386296					0.356046		-0.328068	-0.576815
TRMT112			0.373781							0.292521	-0.264527
CIRBP			0.563255	-0.529917	-0.475127			0.28023		-0.36939	-0.367851
SNX6			0.424646					0.289464			-0.259921
CDC42SE1			1.02113	-0.541447			0.722057
RBM8A			0.478827	0.400463	0.342807	-0.25641		-0.315619		0.426399
CCND1			0.250201	-0.530572	-0.675885			0.309746		-0.490248	-0.334766	0.261018
SSR4			0.293583							-0.469887
PSMB4			0.586731
PNN				-1.04049	-0.694114					-0.542568	1.86178	0.552379
EFHD2				-0.845908	-0.660772	0.329007		0.41519		-0.55191	-0.661277
HEBP2				-0.679192	-0.511381					-0.479386	-0.583415	-0.345344
SNHG7				-0.633991	-0.432637					-0.355162	0.539631
PPP1R15A				-0.704126	-0.311859					-0.320759	0.294642	0.494661
ZFP36L1				-0.408101	-0.477035			0.259202		-0.443306	0.344929
ERGIC3				-0.606144						-0.286399
STARD10				-0.491445	-0.364542					-0.284761	-0.393805	-0.263751
GFER				-0.488931
RPL41				-0.541638	-0.59555					-0.523949	-0.92687	-0.624749
EIF4B				-0.494062	-0.334906						-0.336525
MAP2K2				-0.396519	-0.335424						-0.519622
TOP1				-0.691382	-0.609861			0.383735		-0.383866	-0.455576	0.632502
YY1				-0.433692							-0.281246
LITAF				-0.456297	-0.263814			0.34897			-0.309878
PDXK				-0.371901
TTC3				-0.445809
SF1				-0.488272							0.614352	0.351994
THEM4				-0.446346	-0.308769					-0.362303
CHMP4B				-0.454899	-0.469173			0.393145		-0.283896	-0.45794
CAMTA1				-0.385928							-0.398136
TJP1				-0.420466
C1orf86				-0.302763							-0.332111
MPG				-0.366047							-0.2665
SMIM22				-0.496542	-0.259448	0.308228				-0.277576	-0.251594
BRD2				-0.483608
TSPAN13				-0.401523
CTBP2				-0.375448	-0.299357					-0.310428
CST3				-0.439357	-0.284888			0.335695		-0.435335
ERO1L				-0.471299	-0.31909		0.349413			-0.428179		0.266645
SETD5-AS1				-0.436773	-0.509849					-0.526561	1.10237	0.433437
C11orf48				-0.41745							-0.295383
C11orf31				-0.337989	-0.277182						-0.373726
UFM1				-0.30703
DCBLD2				-0.630715	-0.403383			0.258964		-0.456231		0.252284
PCBD1				-0.28087							-0.369057
SLC7A11				-0.406181	-0.462845	0.298164				-0.684388	0.469969	0.585468
SRA1				-0.298008							-0.294698
NPW				-0.597082	-0.529049	0.288011		0.314026		-0.463956
MKNK2				-0.515244	-0.47009			0.270475		-0.428129	-0.358318
EML4				-0.342078	-0.467393	0.283683				-0.416845
GNB2				-0.27569
KDELR1				-0.375497							0.596341
SLC7A5				-0.314678	-0.285059	0.255758				-0.496028		0.582092
HECTD1				-0.349813	-0.349532					-0.279545	0.57201	0.590577
ARF3				-0.375166
H1FX				-0.460221	-0.444316					-0.39729
MYEOV2				-0.345553							-0.283079	-0.289925
VTI1B				-0.339262								-0.307786
EMC4				-0.292314							0.323386
ABCC3				-0.436481	-0.318828					-0.364768	1.15558	0.37144
GNB1				-0.271513	-0.295461						-0.275333
MIDN				-0.3989	-0.504061					-0.398965
RSL1D1				-0.37003
SLC25A37				-0.363228	-0.444969		0.402896			-0.416213	0.721723	0.433455
IARS				-0.413907	-0.363613						0.254276	0.524278
PRRC2C				-0.323133								0.495752
CANX				-0.356921						-0.48944	0.447746	0.708147
ARHGAP5				-0.292288	-0.375799					-0.375505		0.41155
SLC35B1				-0.261604
SMAD3				-0.458628	-0.288207							0.291878
DENR				-0.261713
CNN2				-0.266383
SLC38A1				-0.276588	-0.382086					-0.323883		0.342462
MAT2A				-0.290493	-0.284284					-0.293948	0.740189	0.294545
CSNK1A1				-0.310969
NUDT3				-0.293867
POLD4				-0.257382							-0.265134
RAB5C				-0.296096
DHX36				-0.271618								0.338461
CCDC59				-0.28839
SEC11C				-0.355104						-0.350312
NAMPT				-0.381919								0.395452
RPL7L1				-0.318833
AK1				-0.33234
RP11-423O2.7				-0.387483	-0.330326	0.429862					-0.424466	-0.268144
SON				-0.315411	-0.28408							0.627087
DDX18				-0.262001
CLTC				-0.305557								0.566116
PGLS				-0.331902				0.28789			-0.474681	-0.319964
CIB1				-0.553739	-0.514986	0.283161		0.45272		-0.448332	-0.750244
NUCB2				-0.433151	-0.345954			0.36797		-0.446234		0.356155
FLNA				-0.269506								0.609598
RTF1				-0.252306
FAM60A				-0.358198
MYO10				-0.26972								0.274525
CHD4				-0.323112							0.487277	0.290028
AP3D1				-0.285534	-0.278793					-0.282861	-0.334055
FXYD5				-0.253723							0.296683
HAGH				-0.389572
SH3YL1				-0.251925
STC2				-0.283036							1.02406	0.594901
CDK2AP2				-0.398838	-0.454607			0.362004		-0.367323	-0.61352
SHB				-0.377389	-0.250332					-0.250564	-0.269418
2021-03-06				-0.294452						-0.303447	0.832037	0.543514
HNRNPUL1				-0.257593
IFNGR2				-0.333986
DNAJC3				-0.434231	-0.382048		0.506275			-0.428363		0.37488
UBALD2				-0.372633	-0.514753				0.682932	-0.398056	-0.496517
BRD4				-0.283208	-0.423783					-0.403987	-0.363271
BCL2L1				-0.359538
ORMDL1				-0.255718
TOMM5				-0.28813
PKN1				-0.296323	-0.31745
SRD5A3				-0.638793	-0.500439	0.583436		0.350656		-0.520582	-0.34132
TMC5				-0.755329	-0.760478	0.533507		0.64596		-0.7299	-0.605877	0.36292
IGF2BP2				-0.33922							0.448016
BCL2L13				-0.392224
PSMA6				-0.259491							0.276532	0.316728
PXN				-0.278412
UPF3A				-0.341471
OSBPL8				-0.280453
ERV3-1				-0.452523	-0.378825					-0.393637	1.05686	0.411582
SAV1				-0.40159	-0.332022						-0.316099
GADD45A				-0.262593	-0.271325						0.600589
DLG1				-0.330588	-0.331484					-0.300068	0.7186	0.286061
LPP				-0.382229	-0.308115					-0.265108		0.318073
CKAP4				-0.294908	-0.260447					-0.333518		0.590284
LMAN1				-0.30297								0.468073
KTN1				-0.329824						-0.252857	0.541796
CSNK1E				-0.287414
MGAT4B				-0.260393
CSNK2A1				-0.330924
SZRD1				-0.325634
STK24				-0.302538	-0.333078					-0.301192
MAD2L2				-0.267271
DNAJC1				-0.275678						-0.401143
PRSS3				-0.953241	-0.998807			1.06214		-0.945689	-0.820891
ZNF428				-0.389912
PLAU				-0.372544				0.251605		-0.319348	0.558088	0.610691
STARD3NL				-0.267654
CMTM8				-0.252563						-0.263548
GOLM1				-0.258047	-0.32803			0.302382		-0.377208
RRBP1				-0.299554						-0.280205		0.285681
UBE2Q1				-0.309198	-0.250172					-0.25755	-0.253824
LTBP3				-0.30839						-0.295724		0.318198
ECE1				-0.405657	-0.335872					-0.358048		0.474962
MAFG				-0.269431	-0.275191						0.891784
CELF1				-0.347333							0.467286
PLXNB2				-0.2887						-0.250193		0.467132
PSMG4				-0.261153
RNF213				-0.325963
SLC22A18				-0.463616	-0.460723			0.321272		-0.500821		0.32863
SLC25A36				-0.291517							0.353543
GATAD2B				-0.328156	-0.273278					-0.287398
NCOR2				-0.252408
FAM107B				-0.334788	-0.27036						-0.253296
FAM127B				-0.273566
BPTF				-0.309175
POLE3				-0.323097
PON2				-0.294076							0.259146
PITX1				-0.325141
RHBDD2				-0.321855
AKAP9				-0.330915								0.41912
NFE2L1				-0.320194	-0.355429					-0.403524		0.354921
RPL38				-0.548826	-0.52542					-0.414006	-0.828225	-0.53483
NOC2L				-0.349644							0.65244	0.319462
ESRRA				-0.294413
RPL32				-0.365773	-0.418286					-0.355734	-0.843858	-0.711038
GLRX				-0.282788							-0.307472
GALNT10				-0.320934							0.505377
RP11-640M9.1				-0.353516	-0.363918					-0.335423		0.570921
SMARCD2				-0.297528
SMURF2				-0.260651							0.25948
TFF1				-0.589169	-0.800772	0.741147		0.396391		-0.728697	-0.701697
RSBN1L				-0.294921							0.273927
DEXI				-0.285916
TWF1				-0.306853
UBN1				-0.305951
FAM177A1				-0.410615	-0.381892					-0.260572
DNAJC5				-0.286633
PTEN				-0.280418
FNBP1				-0.288587
RNF130				-0.262014	-0.283566
CUX1				-0.273051
G3BP2				-0.30031
YPEL3				-0.289187
RDH10				-0.459297	-0.478195	0.452795		0.393936		-0.451367	-0.386174
PPDPF				-0.523774	-0.365148					-0.257793	-0.813212	-0.735007
FUT8				-0.296553
APOE				-0.390868							0.285149	0.331542
COX7A2				-0.59115		0.311736					-0.577405
OCIAD2				-0.674741	-0.400331			0.266622		-0.368291	-0.340318
ITGAV				-0.262601						-0.258894	0.282865	0.355368
SEL1L				-0.314139	-0.250816					-0.2644		0.413207
ZKSCAN1				-0.280613								0.285579
HYOU1				-0.337509	-0.301182					-0.290327		0.501031
RPS19				-0.310685	-0.303279					-0.277239	-0.740306	-0.590312
RCC2				-0.263234
EFNA5				-0.31717			0.255819				0.478223
INTS3				-0.287476								0.305625
LUZP1				-0.289023
PPIC				-0.273124							0.252168
SLC44A1				-0.286447
FNDC3B				-0.286061	-0.267891					-0.25835		0.359298
RPS15A				-0.368711	-0.360658			0.26756		-0.299086	-0.7076	-0.643648
SET				-0.504554	-0.274371		0.624061				-0.62299
MAPK6				-0.278683
CLSTN1				-0.292398								0.293026
FAM102A				-0.274966
YBX3				-0.54433	-0.427687					-0.318121	-0.711143	-0.349685
ZFAND2B				-0.263776
DIAPH1				-0.270058
RPL29				-0.388257	-0.377694					-0.322993	-0.773872	-0.689149
B4GALT7				-0.272197
CPD				-0.326761	-0.327895	0.26374				-0.312351		0.516141
MAGEF1				-0.291453
EIF2S2				-0.312588	-0.351568						-0.628735
JMJD1C				-0.270199								0.41704
KRTCAP3				-0.285448
DRG1				-0.257325
MAPKAPK5-AS1				-0.259291
WNT7B				-0.328026
SNCG				-0.373762
ZSWIM7				-0.251395
ERN1				-0.319669	-0.345077					-0.332667	-0.258808
VEGFA				-0.294751	-0.309173					-0.282278		0.299871
SRP19				0.261715
CNOT7				0.262828
CPSF3L				-0.274797
TNFRSF21				-0.260132
NMRAL1				0.266893
GAR1				-0.268141	0.312523					0.255683
ICA1				-0.251907
MRPS5				0.273728
DUSP12				-0.250635
NFE2L2				0.265735	0.290191					0.42671	0.278405	0.277596
RP11-349A22.5				-0.250752							0.302774
MRPL40				0.265245	0.353094
SLC35F6				-0.258182			0.32039
UNC5B				-0.307023	-0.343982					-0.319585	-0.2951
SLFN5				-0.286306	-0.286289					-0.288726		0.322682
CTSB				0.289264						-0.262804	0.412928
EIF2AK1				0.262633
PIM3				0.272213
SEC61B				-0.435118	-0.393539			0.289108		-0.255076	-0.599969
PPP3CA				-0.253298			0.322991
BCYRN1				-0.450769	-0.50296					-0.463808		0.278256
ARHGEF2				-0.251624
FAF2				-0.255774							0.465235	0.293923
WIPI1				-0.259316
MDM4				-0.2524			0.375951				0.457298	0.311917
CAPN12				-0.263901						-0.265518
ARL3				0.277382						0.308653
TAX1BP3				0.262031
ACTL6A				-0.317704	0.335444					0.342371
DAP				0.356151						0.280694
SMARCB1				0.278548						0.258788
TRAPPC3				0.264513
MRPL37				0.290013
RGS17				-0.298901	-0.313343	0.329554				-0.302817
PGD				0.297793	0.356987			-0.307178		0.291794		0.324925
FTH1				-0.322005	-0.370999					-0.306717	-0.950534	-0.835003
IDH3B				-0.25848
TMEM208				0.281717							0.370822
VPS29				0.262971	0.344585					0.352587
RAB2A				0.341288
BIRC3				-0.313902							0.259448
PCNP				0.305132	0.27695					0.269065
TMCO1				0.292001							0.687234
EIF4H				0.253248	0.281797					0.412025
SRPK1				0.285681
MRPL1				-0.256486
LSM1				0.400665
GRHPR				0.322795
POLR2E				0.319657	0.266332					0.315509
COMT				0.255721	0.341115
PCMT1				0.329066	0.437453						0.747978	0.26288
CLNS1A				0.333406
MED30				0.254783
TPGS2				0.305267						0.254728
UQCR11.1				-0.294705	-0.303879						-0.476346	-0.375915
TUSC3				0.273006
NAA20				0.289163	0.412081					0.475436
CAP1				0.262713						0.321151
MT-ND4L				0.263177								0.278111
CDC26				0.254609
SFT2D1				0.293384
ORMDL2				0.277005	0.380256						0.589324
CD151				0.322305	0.46221	-0.286024	-0.256387				0.921117	0.284527
RAD21				0.325546					0.275553			0.333946
AZIN1				0.266696
BAD				0.360578
KHDRBS1				0.307604								0.307256
TMSB4X				-0.35314	-0.335241			0.633504			-0.729485	-0.597618
TECR				0.331916							0.741272	0.348257
GPS1				0.274299
TMEM258				-0.406948	-0.57223	0.26465		0.260529		-0.479096	-0.577749
NAA50				0.295887	0.353027					0.319661
ESD				0.329016	0.308747					0.36398
UGP2				0.257026								0.284304
MRPS18C				0.272599	0.309592
PRDX6				0.309734	0.49242			-0.252109		0.528709
NELFE				0.282787	0.326057					0.387066
MAGOH				0.347051	0.434181					0.340314
ZG16B				-0.262331	-0.289395			0.38298		-0.273304	-0.252275
SDC1				0.332949							0.579614	0.293434
VAPA				0.256682	0.29998					0.393368
PSMG2				0.27291	0.306978					0.339673
CEBPZ				0.314172
RPL27A				-0.284701	-0.3521			0.254552		-0.30615	-0.794445	-0.553413
ANAPC16				0.302108							-0.281803	-0.30097
ACADVL				0.395996							0.535386	0.407906
ZMAT2				0.3231	0.267735					0.288916
NDUFB6				0.325378	0.504444			-0.267598		0.303674	0.297989
MRPS7				0.275953	0.273014
PDAP1				0.299802
TCEB2				-0.349308	-0.269412						-0.691918	-0.555865
EXOSC1				0.274685						0.256412
ENOPH1				0.260742						0.254617
MARCKSL1				0.260389						0.329918
G3BP1				0.301542	0.346223					0.438193		0.280094
ISOC2				0.27138
PGRMC1				0.26833	0.320135						0.65541
NCBP2				0.289102	0.278865					0.27292
RPL39				-0.286977	-0.373823					-0.277546	-0.884222	-0.712619
GLUD1				0.282734
CHCHD1				0.349968
METTL9				0.352311
ATRAID				0.365986							0.39438
SNRPD2				0.57961	0.603525	-0.287809		-0.299765		0.540221		-0.390563
PRPF31				0.305346	0.358512					0.35605
SNX17				0.318172
FGFR1OP2				0.299943
BCAP31				0.287569	0.453565						0.779599	0.321892
MRPL19				0.362747	0.310736					0.323911
CCDC104				0.467645
COMMD6				-0.309561							-0.619012	-0.57748
RPS6KB2				0.281012
IDH3G				0.292919
WBSCR22				0.445789	0.374933					0.332541	0.626964
FAU				-0.378052							-0.599053
EBNA1BP2				0.375401	0.373974	-0.292098		-0.266093		0.596984
MGMT				0.308338
RPL37A				-0.282115	-0.386232					-0.331709	-0.689239	-0.518257
CDH6				-0.269486							0.282938	0.31094
DPCD				0.251797
MRPS23				0.45811	0.277908
GSTO1				0.337281	0.498121					0.461258
PPM1G				0.409089	0.349303					0.281395
GABARAPL2				0.444743
TIMM17A				0.300662	0.371478					0.303012
C22orf39				0.42008
FOPNL				0.323674	0.27952					0.337222
LMNB2				0.264411
MAPK1IP1L				0.260304
H2AFY				0.310431	0.443605			-0.273116		0.447141
SHKBP1				0.307384	0.293936					0.29644
VAPB				0.250736						0.251317
SCP2				0.27417						0.266574
ARL2				0.365463
PDLIM7				0.291357	0.378079	-0.395803		-0.263222		0.464168
VMA21				0.351774				-0.306687				-0.253988
PTBP1				0.282499
HMOX2				0.327707	0.270515					0.313683
MRPS14				0.36409
SMC3				0.270885	0.250943					0.388494		0.300969
SCOC				0.28463						0.258836
ECHS1				0.311538	0.357224					0.491336
NELFCD				0.250704							0.38525
HEBP1				0.348946						0.293781
SLC35B2				0.324899							0.426747
MFSD10				0.353021							0.7039
RBMX				0.340086						0.387971	0.445616
RAB11A				0.356414	0.319864					0.363482
LSM14A				0.356066
EXOSC3				0.274049
IMP4				0.44048
YIF1B				0.366764
GSDMD				0.367441								0.318394
LRRC59				0.372648	0.298885					0.290864	0.28928
ANAPC13				0.36355
CECR5				0.289433
PPP2R1A				0.351558						0.311776
PSMC6				0.354307	0.425031					0.438562		0.325612
NDUFA5				0.286466	0.263766					0.337541
CSDE1				0.378165
RPLP2				-0.261344	-0.369489			0.261934		-0.320546	-0.727109	-0.520621
MRPS35				0.445127
LAD1				0.26427
FAM103A1				0.305836
PRDX3				0.402375	0.398869					0.46938
EIF4G2				0.258807	0.340394					0.45754
KATNBL1				0.255375
MED28				0.340337
ME1				0.26475
DKC1				0.363154	0.423148					0.307741		0.253908
RNF114				0.291648
TRAPPC6A				0.261046
AIP				0.329233
ZBTB8OS				0.368041						0.339934
METTL5				0.501549
EXOSC8				0.351876	0.349464			-0.255826		0.304176
GNL3				0.310787						0.35322		0.28656
LYAR				0.329655						0.282672
NDUFB2				0.256541							-0.289821	-0.313944
OAZ2				0.388813
TMEM261				0.440455
ACSL3				0.310554							0.425845	0.349762
MRPL42				0.260806	0.304378			-0.266975		0.28163
SMIM15				0.426599
TWISTNB				0.28614
SDF2				0.279798							0.53559
PTGES				0.322153							0.442604
NIFK				0.373711						0.30273
PHF5A				0.404376	0.348734			-0.350182		0.328171
LLPH				0.396099	0.359223					0.397177
CSRP1				0.345467	0.34638					0.531693
NIT2				0.290953	0.5027					0.337867
RAD51C				0.344514
ADI1				0.460848	0.307234
TSEN34				0.303472	0.286776
NSUN5				0.331005
NUCB1				0.317257							0.491848	0.285147
PERP				0.314222	0.406959						0.771841
C11orf58				0.251036
SMS				0.36972	0.320525					0.429418
RCN1				0.420817							0.556908
COPZ1				0.433409	0.348816					0.473044
EMC3				0.348358							0.644356	0.253079
PEA15				0.26242
CINP				0.341337
CBR1				0.374938	0.283395					0.269833
GRSF1				0.317071
COMMD4				0.338357	0.337352					0.305752
ATP1A1				0.367546	0.263181						0.724332	0.550394
AC010642.1				0.274368
ETFA				0.389557	0.309627					0.38862	0.261268
MORN2				0.40708
UTP11L				0.363374						0.349235
TTC1				0.388811	0.264226					0.408514
RUVBL2				0.44601	0.267385					0.334842		0.323164
RABIF				0.299655
MRPL2				0.318314
TRAP1				0.400971	0.382967					0.337027		0.510232
HDAC1				0.370306	0.335406					0.389081		0.272671
SLC39A7				0.269683							0.565201	0.262476
THRAP3				0.497522						0.283247		0.375898
EBP				0.324986	0.369901						0.651956
ACIN1				0.293385
SAP30BP				0.344731
C12orf29				0.362155
CPSF6				0.270712
MORF4L1				0.389866	0.385151					0.422051		0.252857
MED4				0.374163	0.329714					0.265656
MRFAP1				0.424994	0.529521			-0.308044		0.438373
NCL				0.485465	0.250406	-0.261418				0.450084		0.387404
PRPF38A				0.272198
PKP3				0.276329						0.284441
MNAT1				0.325183						0.27233
TINAGL1				0.299429							0.352798
ABHD2				0.275748
TINF2				0.256267
U2AF1				0.265985	0.383449	-0.285791		-0.363363		0.498469
CETN2				0.290528	0.368572
UBE2A				0.491132	0.280052					0.383063
DNPEP				0.307478
FKBP4				0.352594	0.475786			-0.267393		0.573164
SAE1				0.2823	0.359011					0.44786
LINC00511				0.336924
SREK1				0.262279							0.280458	0.299712
2021-03-05				0.292037
PSMD8				0.346082	0.518131	-0.288024				0.555715
MDK				-0.306068	-0.273848			0.262757		-0.482896
OSER1				0.31824
VDAC2				0.26273	0.327515					0.365591
ARF1				0.319572	0.470662					0.536654
SOD1				0.254501	0.525022			-0.288145		0.430182
RABEPK				0.258257
AP4S1				0.260305
COPS3				0.508102	0.365473					0.329935
PRPSAP1				0.296744
PPT1				0.299001	0.3408						0.642912	0.300415
HTRA2				0.308261
RTCB				0.279985	0.417547					0.292328		0.269928
BCAS2				0.331031	0.41179					0.370701
EIF2S1				0.472612	0.452448					0.480092		0.26397
PSMD12				0.394337	0.259286					0.3624	0.251186	0.258211
C8orf82				0.343602
POLR2K				0.254173	0.261358			-0.275081		0.343366
TEX30				0.31287
EMC8				0.366668
DPM1				0.423705	0.280533					0.339211
PSMD13				0.513617	0.50495					0.435776
PUS1				0.258765
VDAC1				0.33924	0.468457			-0.25326		0.577024
LTBP4				0.277364							0.2553
FARSB				0.255421
SGTA				0.378507
GOT2				0.318488
GNAI3				0.359947	0.296795					0.32257	0.341992
DSTN				0.437167	0.294199					0.371642		-0.266103
ADRM1				0.338639	0.446226					0.469115		0.265421
REEP5				0.475588	0.301832						0.718836
IARS2				0.277196
E2F4				0.298141
UBE2D1				0.269571
RPF1				0.347635						0.284826
CCDC53				0.274825
TUBB2B				0.397844	0.378491					0.549136
TIMM23				0.296939	0.308262					0.317526	0.289593
RBBP7				0.273538	0.290808					0.388387
COX11				0.287082
CDC27				0.33852
PNO1				0.34281	0.293454					0.271442
BLVRB				0.397792	0.382579					0.465732
CDC123				0.276833	0.334866					0.287586
U2AF2				0.261467
WDR61				0.368157	0.329089					0.255458
PDHB				0.392854						0.310738		0.307943
PSMC2				0.41229	0.349382					0.493647		0.252398
BLVRA				0.270101
SYNJ2BP				0.27423
MTF2				0.361376							0.504864
BRMS1				0.537463						0.257294
SLMO2				0.397313							-0.279019
VASP				0.451727	0.302747
WIBG				0.41235
ID1				0.411637				-0.307287			0.523065
TMX2				0.368973							0.515981
VPS25				0.263262
DDX56				0.293778	0.317071					0.277749
FLAD1				0.382184
CENPH				0.414819	0.357481			-0.279397		0.295861
TERF1				0.344119							0.268009
PRPF19				0.286376
MFI2				0.28402							0.435874
TUBG1				0.250422	0.276107
ATG5				0.344092
SNRPA1				0.537153	0.395499			-0.297327		0.470627
OXCT1				0.272067
MRPL22				0.511625	0.393405			-0.315616		0.419304
PPP5C				0.260087
MAP2K3				0.328636						0.25435
GEMIN6				0.323959	0.280432
SF3B14				0.267618							-0.354384
DCTPP1				0.422356	0.351754			-0.287545		0.410435
ACP1				0.265618	0.292955			-0.261439		0.254322		-0.285012
RNASEH2A				0.524219	0.391994			-0.266654		0.369515
SBDS				0.600331	0.358015					0.41547
EIF1AD				0.285693
DIMT1				0.287698
ZNF444				0.27203
PSMD11				0.387355	0.298212					0.465051
COMTD1				0.436558
PSMB8				0.464473	0.413308					0.314844
STIP1				0.499733	0.33262					0.344581		0.338801
KRR1				0.292717	0.256362					0.315336
APRT				0.26473
MED21				0.386473						0.280289
NDUFB3				0.38112	0.429005			-0.387139		0.421011
PPIF				0.276897	0.419269			-0.282901		0.357174
MRPS9				0.341918
TM7SF3				0.332764							0.2566
SPCS1				0.312815	0.334376						0.449256
C17orf62				0.305326							0.399249
POLR2C				0.336977
THG1L				0.321045
EMG1				0.45036	0.448997					0.309899
IGFBP6				0.442425							0.369431
PSMB3				0.50083	0.62844	-0.327355	-0.292747	-0.351016		0.637236
MRPL3				0.494749	0.476795					0.594744
TTLL12				0.282407
ARL6IP6				0.314564
RARS				0.396084						0.384273		0.327171
ELP5				0.294529
NSMCE2				0.347552	0.26854					0.360419
CCDC47				0.527031							0.611234	0.475441
ACTN1				0.460585						0.310913		0.272159
SOX2				0.286836
RCC1				0.27959	0.291786					0.35928
WDR77				0.329223	0.257521					0.328624	0.276247
TMEM218				0.254648
UNC50				0.281933
THOC6				0.469882						0.281208
HPRT1				0.405014	0.472561					0.479045
NOP16				0.522388						0.259451
UBE2D3				0.408475	0.295899
KARS				0.585675						0.25226
NF2				0.552232
PSMC5				0.286356	0.412238			-0.263769		0.493681
FUBP1				0.334282	0.29685					0.295668
PPP2CA				0.648395	0.367583					0.470271
XPA				0.283465
PPP1CA				0.3186	0.410775					0.436887
SRP14				0.374678	0.385756			-0.265165		0.43588
PLIN3				0.373165
CAPZA2				0.611014	0.411248					0.517749	0.255364
TMEM126A				0.461553	0.309643			-0.311673		0.253615
TXNDC17				0.496105				-0.283549		0.305463
HYAL2				0.436956							0.385105
ATP5C1				0.595742	0.393563					0.379725
FH				0.348618	0.30059					0.373373
HIBADH				0.315755	0.3698					0.378144
TRIP13				0.377958	0.310239			-0.253432		0.392163
C16orf80				0.396577
MOB4				0.325731						0.341551
FAM86A				0.404357
SQRDL				0.438764						0.250949
LGMN				0.473747							0.586073	0.431346
PSMD3				0.391892							0.253902
GTPBP4				0.393492
SMIM13				0.461455
CPNE1				0.616556	0.327424					0.297769	0.270995
ARL2BP				0.318932
RPP30				0.535974	0.311746					0.32917
BRE				0.461132	0.29502					0.305425
CUTC				0.316039						0.278782
UBAP2				0.305254
NSMCE4A				0.352213
RFC2				0.343016	0.330302					0.417111
MRPS22				0.456053
NDUFAB1				0.341364	0.440937					0.344847
UGDH				0.659633	0.340443					0.354854
GUSB				0.316618							0.548927	0.269314
QDPR				0.357463
ACAA1				0.313657	0.329658					0.469147
CLTA				0.291305							-0.320852
RNPEP				0.318697						0.292417		0.294459
RAB7A				0.658782	0.383288					0.512053		0.262093
FKBP3				0.434539	0.507989	-0.269736	-0.251727			0.577096
COTL1				0.609862	0.366322			-0.281357		0.461729
TM2D2				0.352431							0.362237
S100A3				0.398061	0.287285			-0.269994		0.291741
PDZD11				0.613493	0.287726
DHRS1				0.417193							0.279838
CSNK2B				0.274857								-0.288779
TMEM70				0.527425	0.318183
TUBB6				0.264958	0.353836					0.467849
GRPEL1				0.484693						0.35802
TPX2				0.332474				-0.267014	0.52849
ADH5				0.521334	0.382501					0.379301
MPDU1				0.425826							0.626059
RHOC				0.377075	0.458445	-0.270546				0.452805
PSMB6				0.485693	0.5239	-0.297455		-0.313976		0.58659
MYL9				0.430224	0.308798					0.399744
METTL10				0.6341
HSPB1				0.427087	0.512368		-0.280479	-0.346092		0.602468
NDUFB9				0.280349	0.305274			-0.264219				0.316369
POP4				0.640381	0.29256					0.313558
HNRNPC				0.363859						0.374507
YWHAE				0.444246	0.392334					0.43133
ACAT2				0.547685	0.304333					0.395676
HAT1				0.514411	0.383104					0.420378		0.255698
PSMA2.1				0.636179	0.479162			-0.270684		0.507426
C1QBP				0.493614	0.554784			-0.251346		0.585316
HNRNPH2				0.576612	0.325868					0.304993		0.32933
PARK7				0.5709
SERBP1				0.460382	0.361885					0.409639
COX5A				0.304241				-0.282494
CNBP				0.300369						0.36003
ARPC3				0.393573	0.395695					0.469216
MYL12B				0.522035	0.610064	-0.342101	-0.296084			0.5938
SNRPF				0.386057	0.366752			-0.393958		0.439411
CYCS				0.311606	0.489087	-0.284227		-0.288129		0.482809
NDUFB10				0.351385							-0.294021	-0.25131
WASF2					-0.296117
CDV3					-0.315612						-0.416153
PPFIA1					-0.353953					-0.279019	0.279007
RNF145					-0.38584	0.280787				-0.315366
SLC38A2					-0.458457					-0.408437		0.596584
POGZ					-0.481598					-0.46117	0.346086	0.479215
GLRX5					-0.4019				0.350496	-0.252476	-0.51254	-0.278574
TAF1D					-0.309312					-0.26947	0.783578
JAK1					-0.34563			0.314723		-0.287194	-0.368108
RRAS					-0.357654					-0.330034	-0.379566
MPST					-0.329003			0.270977		-0.289247	-0.44546	-0.254778
ALKBH7					-0.291879						-0.351795
GIPC1					-0.253862
LRRFIP1					-0.304258
PLEC					-0.310544							0.386669
VAMP2					-0.26325						0.516159
HINT2					-0.328628						-0.670003
ITGA3					-0.342853					-0.376421	0.496007	0.405449
RALGAPA1					-0.318432					-0.286816	0.309298	0.470686
TM9SF3					-0.268796					-0.273539		0.252245
TRPT1					-0.254794						-0.251152
APLP2					-0.392626			0.324239		-0.512731		0.709348
SPTBN1					-0.317264							0.501953
SNHG15					-0.278233						0.371836
CTSZ					-0.259977					-0.294722
LRP5					-0.288296					-0.342095		0.306364
ANKRD11					-0.276168					-0.274149
CDC34					-0.270587						-0.271044
PTBP3					-0.261284
MUC4					-0.279606					-0.328066	0.545342	0.451533
POLR1D					-0.278807						-0.378925	-0.272673
SLC7A1					-0.252566							0.324786
FXYD3					-0.29768	0.454587		0.279031		-0.313618	-0.295522
TPBG					-0.261128					-0.261081		0.611039
PNRC1					-0.261453
ATF4					-0.277218
PYGB					-0.265729						-0.25144	0.260983
RPL12					-0.286309					-0.252271	-0.828128	-0.866444
IGFBP3					-0.322876			0.457693		-0.335736		0.291363
TIMM50					0.257246					0.25059
GLO1					0.268296					0.351057
CCNI					-0.405858			0.370109		-0.292723	-0.768834	-0.328874
ERI3					0.269936					0.283971
HIGD1A					0.266446
TMEM59					0.266148						0.554681	0.376421
MED10					0.281959
SPAG7					0.281354
S100A16					-0.42968			0.310142			-0.921214	-0.388416
M6PR					0.254153						0.690088
ADSL					0.287113					0.329288
ATP5D					-0.256297						-0.469822	-0.280766
RPL13A					-0.253093						-0.702056	-0.523823
CHCHD3					0.251324
MESDC2					0.311659						0.606095	0.292188
TCP1					0.281973					0.367846		0.274882
POLR2G					0.31056					0.352965
CAPZB					0.336974					0.295726
C14orf119					0.34044					0.35755
MRPS30					0.278871
GRN					0.285261						0.743611	0.579104
TPD52L2					0.288264					0.353919
PFDN1					0.298722					0.379914
MAPRE1					0.307061					0.335124
JTB					-0.341731					-0.396166	-0.39176	-0.425715
NDUFA8					0.270082
TIMMDC1					0.316007
ANP32A					0.318293					0.361485
NOSIP					0.321832					0.376371
PIN4					0.271331
PPA2					0.32647					0.258193
NONO					0.289559			-0.250228		0.477713	0.254996	0.298327
PAICS					0.331242			-0.272282		0.432436	0.302846
ATP1B3					0.350584						0.563416
HSD17B10					0.292422
SRI					0.32615					0.384098
TBCB					0.271922					0.356438
CAPN1					0.343645			-0.272746		0.423494		0.263581
MRPS18B					0.373504					0.368845
ATXN10					0.296143					0.4344
PRDX4					0.37383						0.587209
PCBP1					0.286475
ACOT13					0.314501			-0.277276		0.330221
RAD1					0.286382			-0.27479		0.270835	0.300129
TFG					0.368919					0.361759
PVRL2					0.296199						0.766996	0.350021
PLP2					0.333585	-0.279297					0.479748
AAMP					0.25811					0.312158
RTFDC1					0.391068					0.500684
HSPBP1					0.295557							0.263808
COPS5					0.307004					0.256066
SUGT1					0.334508					0.331035
FCGBP					-0.282489	0.332734						0.583362
UCHL3					0.310166					0.273777
MUC5B					-0.313897	0.717559
EEF1E1					0.375406			-0.283864		0.371506
RAB10					0.338025					0.293338	0.329249
NDUFV1					0.349928					0.421748		0.274834
RAB34					0.300595
PFDN6					0.364652					0.390937
GPI					0.261525					0.278841
GGCT					0.25956			-0.320394
BCCIP					0.255761
WBP5					0.325957
NDUFA9					0.37846					0.322888	0.438228	0.282046
SDHC					0.410652					0.424653
HEXB					0.269393						0.558551	0.395043
AGPS					0.2955					0.265148
COX16					0.282702			-0.27754
TXNDC9					0.337238
DERA					0.283605
DNAJC8					0.441461	-0.25359				0.3958
TMX1					0.420542						0.83033
RBM42					0.426764					0.444452		0.381393
MRPL47					0.439867					0.425542
PSMG1					0.301622
PSMD14					0.455145					0.341601
CCDC58					0.332966					0.449918
PMF1					0.309966					0.280323
MRPL28					0.44205					0.47127
TSN					0.290954
GEMIN2					0.41528					0.258769
TMPO					0.291048
SRP68					0.273672
MRTO4					0.31337
RUVBL1					0.398144					0.454793		0.282695
EIF2B1					0.27092					0.27034
SF3A3					0.272939					0.432504
UFD1L					0.400036					0.382531
MAGOHB					0.432847					0.364707
EIF1					-0.293157						-0.544643
SNX2					0.267461					0.324085
HSPA4					0.310352					0.269864		0.272931
TRUB2					0.298245					0.303819
JKAMP					0.252695						0.458119
UTP18					0.311055					0.277042
FIBP					0.272822					0.342531		-0.275443
PFKP					0.315801					0.262551
SYPL1					0.319213						0.661092
RFC4					0.282485					0.314463	0.547378
NDUFB8.1					0.33299					0.268199
ECHDC1					0.251328
FUCA2					0.278017						0.55746
ALG8					0.293427						0.759143	0.270752
TDP2					0.275759
PDHA1					0.265985					0.347166
NCF2					0.423583	-0.318682				0.510187
GLOD4					0.360008					0.373236
PAK1IP1					0.270481
MAP2K1					0.289439					0.287243
LRRC42					0.263592					0.285093
NAE1					0.271859
MRPL12					0.301805			-0.38216		0.325331
TSFM					0.350514					0.495966
GINS2					0.25948					0.262543
MAEA					0.263535					0.31245
CTSA					0.308254						0.699478	0.251297
PPIH					0.332199					0.318832
RHOA					0.376143					0.447566
RRAGA					0.26058
SGCE					0.25043						0.642019	0.375556
COPS4					0.296071					0.29674
LAMP2					0.260923						0.555393	0.259707
THOC3					0.259687
MCM4					0.296655						0.459201
RTN4					0.297781						0.681669	0.490903
YBX1					0.283468			-0.33382		0.310588	-0.364836	-0.387918
DDX39A					0.312741					0.307558
SUMO1					0.325908					0.378617	-0.284725
CALM1					0.268262	-0.269452				0.421553
MCM5					0.350226
MSC					0.320009			-0.278298
COX6C					0.457958			-0.443429		0.363585
B2M					0.325844						0.845497
BID					0.332069			-0.311804		0.287256
KRT81					0.408047	-0.308175				0.496916
SUMO2					0.261075			-0.281482		0.346867
CLIC1					0.282639						0.329644
NDUFA4					0.252157			-0.250855
POMP					0.392638			-0.314173		0.319751
CYC1					0.419812			-0.328267		0.396624	0.312663
MRPL9					0.271297					0.293006
EIF3K					0.29544
ETFB					0.574728	-0.33743	-0.259843			0.599366
BPIFB2						0.62216
CEACAM5						0.395621
BPIFB4						0.289433
CEACAM6						0.49178
MUC1						0.301408
HPGD						0.257297
MUC5AC						0.263368
IGFBP2						0.275632				-0.284847		0.276645
TSPAN3						0.333311				-0.259697
SERF2						0.265442					-0.593631	-0.490146
CSTB						0.263629					-0.345745	-0.341868
RBP1						-0.432869				0.360074
PTPRS							0.483223
RP11-294J22.6							0.377661
FAM211A							0.385898
TSPYL1							0.316103
ANKRD40							0.337528
TMED4							0.402816				0.315326
TOR1AIP2							0.36273
TRA2A							0.307947
R3HDM2							0.269232
DOCK5							0.250833
SRSF6							0.28819
RAP2B							0.266018
TP53							0.25185
PLEKHH2							0.297049					0.346956
PDZK1IP1								0.300647
SAA2								0.351896
RND1								0.268791
PRRX2								0.289742
EGFL7								0.311931
RAMP1								0.313664
NPDC1								0.306463		-0.283451
CREB3L1								0.304915
PHACTR3								0.297854
FHL2								0.276466
CERS2								0.284081			0.539484
SELM								0.272682
RPS4X								0.263062			-0.615648	-0.410901
RPL7								0.259664			-0.688443	-0.456454
COX7C								-0.294098			-0.366527	-0.301557
RPLP0								-0.256722			-0.320682	-0.439838
PTMA								-0.28574		0.324521	-0.424243
TROAP								-0.255849	0.328683
LSM5								-0.435821	0.320644	0.288551		-0.275013
ATP5H								-0.276106		0.270605
NEDD8								-0.291559
HIST1H1C								-0.292966		0.273743
PHPT1								-0.270701
MZT1								-0.298897	0.408057	0.288252
ITGAE								-0.355102
CCDC34								-0.261519	0.274443
ANP32E								-0.269799	0.316926
DDT								-0.277713
KPNB1								-0.267411			0.435499	0.383259
S100A2								-0.275246			-0.305801
LUC7L3								-0.280469			1.03824	0.395065
TPRKB								-0.250364
ARHGDIA								-0.266511		0.412179
PRR11									0.471528
PLK1									0.453225
CKAP2									0.452517
GTSE1									0.43795
ASPM									0.40333
SAPCD2									0.377464
PRC1									0.375018
KNSTRN									0.375015
HMMR									0.355894
CENPE									0.316675
SGOL1									0.314299
ARHGAP11A									0.295304
DEPDC1									0.288824
GPSM2									0.284597
CEP55									0.281454
PIF1									0.269406
KIF14									0.265597
FAM64A									0.262632
CCNA2									0.252415
DBF4									0.250202
ANLN									0.25502
NCAPD2									0.255928
FOXM1									0.310852
EMC9									0.420229
CDC25B									0.289365
HP1BP3									0.333182
NUDCD2									0.250192
CNIH4									0.29854		0.383392
COX17									0.311698		-0.42683	-0.319736
PTMS									0.274184		-0.353739
LGALS3									-0.266356		-0.447332
GANAB										-0.415128		0.302848
SEC61A1										-0.334095	0.293912	0.459695
SYNGR2										-0.310412
LARP1										-0.28895
SSR1										-0.255524	0.451602	0.289987
UBE2R2										-0.267907	-0.262266
LRP10										-0.268594	0.361754	0.326299
TMEM205										-0.256433
DYNLL2										-0.253131
LAMC2										-0.308499	0.669799	0.507175
MLEC										-0.257856		0.28442
CD164										-0.253667	0.427874	0.405498
PXDN										-0.297809		0.34006
P4HB										-0.293914	0.496775	0.632471
FKBP2										-0.291667	0.279675
[truncated: 665 more rows]
