# Supplementary material for: Targeting CDA-Directed Metabolism With 5-Formyl-2'-Deoxycytidine For ALK Inhibitor–Resistant Lung Cancer Therapy
Source: Research Square preprint supplement (doi:10.21203/rs.3.rs-1110449/v1), 2021-12-01
Supplement: Supplementary file 2 [file 7a4588f59dd0f2efe7b6f914.xlsx]

## Sheet: Sheet1
Supplementary Table 7. Differentially expressed genes in CDA-overexpressing cells (also see Fig. 2).
Gene	p_val	avg_logFC	pct.1	pct.2	p_val_adj
CDA	4.68956e-52	1.1959	1	0.076	8.44777e-48
VIM	4.63273e-50	0.832162	0.412	0.011	8.3454e-46
ZBED2	9.19366e-35	0.262594	0.235	0.005	1.65615e-30
KRT81	2.86355e-15	1.02068	0.765	0.145	5.1584e-11
COL5A1	3.54724e-11	0.640947	0.647	0.135	6.39e-07
COL4A2	5.1666e-11	0.695703	0.529	0.091	9.30711e-07
S100A10	2.27465e-09	1.12589	1	0.995	4.09755e-05
LGALS1	7.842e-09	1.27268	1	0.956	0.000141266
CST6	1.0236e-08	1.22	0.882	0.509	0.000184392
SH3BGRL3	1.95582e-08	0.691906	1	0.952	0.000352322
NEURL1B	6.47931e-08	0.316993	0.412	0.073	0.00116718
EPHB2	7.39246e-08	0.305246	0.824	0.314	0.00133168
IL32	2.10643e-07	0.633568	0.941	0.492	0.00379452
PDLIM4	1.62486e-06	0.518847	0.824	0.477	0.0292703
PDLIM7	2.33316e-06	0.684996	1	0.694	0.0420295
FSTL3	2.36589e-06	0.315578	0.588	0.196	0.0426191
GDF15	7.61215e-06	-1.08641	0.824	0.965	0.137125
CD44	9.58664e-06	0.290679	0.647	0.236	0.172694
PLP2	9.69606e-06	0.448053	1	0.687	0.174665
AP3S1	1.28862e-05	0.454685	1	0.708	0.232133
TAX1BP3	1.31037e-05	0.370899	0.882	0.555	0.236049
PALLD	1.66461e-05	0.362389	0.588	0.202	0.299863
BPIFA2	1.80188e-05	-0.880999	0.294	0.77	0.324591
CCPG1	2.03605e-05	-0.450711	0.588	0.87	0.366775
CALM1	2.41685e-05	0.432013	1	0.931	0.435372
TKT	2.41751e-05	-0.583241	1	0.981	0.43549
BPIFB1	2.57934e-05	-1.59877	0.118	0.639	0.464643
TPM1	2.72198e-05	1.05268	0.765	0.421	0.490338
C16orf74	3.19679e-05	0.291898	0.588	0.223	0.57587
BASP1	3.30575e-05	0.509124	0.941	0.58	0.595497
LDHB	4.27147e-05	-0.388678	1	0.987	0.769462
PMEPA1	4.65686e-05	0.854307	0.882	0.767	0.838886
FSCN1	4.98035e-05	0.299076	0.706	0.328	0.897161
LAPTM5	5.8631e-05	0.398162	0.647	0.303	1
UPP1	6.40067e-05	0.536677	1	0.794	1
BRK1	7.51075e-05	0.347898	1	0.94	1
C15orf48	0.000100997	0.746719	0.824	0.487	1
TGFBI	0.000102822	0.684138	0.765	0.428	1
RAC2	0.000105198	0.418277	0.882	0.635	1
AKAP12	0.0001058	0.468822	0.824	0.426	1
CLDN10	0.000108796	-0.619771	0.294	0.769	1
MT2A	0.000124622	0.850776	1	0.979	1
LINC00152	0.000132679	0.647309	0.824	0.628	1
FHL2	0.000136287	0.503153	0.941	0.839	1
BPIFA1	0.000160584	-1.7436	0.118	0.584	1
PAEP	0.000178629	0.340417	0.706	0.351	1
MT1X	0.0001987	0.562688	1	0.864	1
S100A11	0.00020367	0.377291	1	0.999	1
TNNT1	0.000235777	0.325561	1	0.917	1
WFDC2	0.000237579	-0.60384	0.882	0.936	1
FXYD5	0.000320767	0.349953	0.941	0.78	1
RGS10	0.000423632	0.478492	0.824	0.729	1
IL8	0.000429163	-0.735469	0.588	0.885	1
PYCR1	0.000439107	-0.35669	0.529	0.828	1
IGFBP6	0.000442885	0.360987	0.706	0.374	1
LRP5	0.000455225	-0.315984	0.294	0.699	1
C19orf33	0.000462412	0.530028	0.824	0.751	1
OAT	0.000464103	-0.433774	0.471	0.754	1
CCL20	0.000475009	-0.650857	0.176	0.588	1
ANKRD36C	0.000483632	-0.438842	0.176	0.593	1
S100P	0.000489601	-0.573812	0.882	0.934	1
LAMC2	0.000540004	0.61388	0.882	0.63	1
RRAS	0.000551281	0.368279	0.941	0.725	1
PPP1R14C	0.00061935	0.253368	0.471	0.186	1
ITGB1BP1	0.000672815	0.365006	1	0.82	1
LTB	0.000679168	0.701977	0.765	0.523	1
RP11-423O2.7	0.000704894	-0.446002	0.588	0.834	1
ARPC5	0.000738776	0.35129	0.941	0.783	1
NTAN1	0.00094609	0.280612	0.765	0.481	1
ABCG1	0.00126418	0.255768	0.529	0.223	1
ZFP36L1	0.00127043	0.438074	1	0.892	1
H3F3B	0.00132428	-0.402637	1	0.996	1
LCN2	0.00133717	-0.426076	1	0.997	1
CDC42EP3	0.00136542	0.299531	0.824	0.55	1
ASPH	0.00136557	-0.415027	0.824	0.957	1
KRT7	0.00139918	0.440222	1	0.994	1
SFN	0.00143107	0.3024	0.647	0.344	1
IGFL1	0.00143547	2.27411	0.176	0.036	1
MGLL	0.00143742	0.387421	0.941	0.837	1
RDH10	0.00146145	-0.419361	0.294	0.722	1
ITGA2	0.00164674	0.453121	0.941	0.606	1
MFGE8	0.00179355	0.365255	0.765	0.435	1
AHNAK2	0.00179674	0.305161	0.706	0.362	1
TXNRD1	0.00182533	-0.421632	0.588	0.89	1
FN1	0.00191612	0.38514	0.353	0.119	1
RBP1	0.00202327	0.815868	0.765	0.636	1
HPCAL1	0.00219641	0.261513	0.882	0.725	1
LAMB3	0.00224342	0.273536	0.824	0.593	1
TPRKB	0.00224348	-0.308713	0.353	0.716	1
RHOD	0.00228625	0.256024	0.529	0.272	1
RAB31	0.00229805	0.286069	0.765	0.547	1
CKAP4	0.00231684	-0.312672	0.412	0.772	1
BCL2L1	0.00234417	0.34631	0.824	0.616	1
CD55	0.00238899	-0.302472	0.471	0.782	1
ITGA3	0.00244432	0.253081	0.941	0.707	1
ISG15	0.00249531	0.466088	1	0.962	1
MLEC	0.00267401	-0.354171	0.765	0.901	1
NFKBIZ	0.00277195	-0.289442	0.176	0.609	1
FLNB	0.00278415	0.261753	0.706	0.401	1
MTHFS	0.00279402	0.316856	0.824	0.457	1
NDUFV2	0.00282556	-0.348891	0.941	0.965	1
AHNAK	0.00302111	0.288486	0.647	0.387	1
CLGN	0.00303623	-0.309933	0.118	0.478	1
TMSB10	0.0030581	0.368117	1	0.999	1
AGRN	0.0031486	0.311487	0.882	0.628	1
NAMPT	0.0031788	-0.299571	0.471	0.745	1
RHOC	0.0032226	0.402742	1	0.901	1
G6PD	0.00325405	-0.384019	0.647	0.912	1
ERCC1	0.00349394	0.34703	0.882	0.778	1
TPM4	0.00350599	0.351178	1	0.953	1
TOP1	0.00354406	-0.392794	0.824	0.944	1
F3	0.00358974	0.382543	0.471	0.227	1
HIST1H2BK	0.0036159	0.252502	0.706	0.414	1
S100A16	0.00387048	0.301714	1	0.995	1
PKM	0.00389817	0.32762	1	0.975	1
DRAP1	0.00426522	0.322023	1	0.934	1
PHF20L1	0.0046645	-0.262816	0.353	0.601	1
HEBP2	0.00477627	0.265785	1	0.915	1
MYH9	0.00479894	0.422168	0.941	0.866	1
SRP54	0.00483374	-0.323007	0.882	0.929	1
BRI3	0.00483401	0.375393	1	0.939	1
C6orf1	0.00486262	0.313094	0.706	0.443	1
COL6A2	0.00491609	0.256084	0.588	0.305	1
RNF145	0.00516402	-0.340115	0.588	0.824	1
CEBPD	0.00533138	-0.283483	0.235	0.623	1
ZNHIT1	0.00541755	0.294198	1	0.885	1
TCEB2	0.00552015	0.271603	1	0.985	1
FTH1	0.00555876	-0.28594	1	1	1
CCT3	0.00564327	-0.303999	0.706	0.871	1
TNFRSF12A	0.00571812	0.259811	1	0.977	1
SLC25A37	0.00580987	0.334495	0.941	0.813	1
RHOF	0.00588411	0.308221	0.941	0.841	1
OST4	0.00613529	0.266031	1	0.972	1
APH1A	0.00613947	0.282289	0.882	0.862	1
SLC25A24	0.00625361	0.258041	0.412	0.177	1
CNN2	0.00625697	0.261153	1	0.825	1
GLO1	0.00659634	-0.270059	0.529	0.76	1
SEC61A1	0.00672596	-0.309562	0.706	0.848	1
PLEC	0.00688852	0.275259	0.882	0.686	1
GPCPD1	0.00701143	-0.301718	0.412	0.693	1
MAP7D1	0.0070573	0.266326	0.471	0.25	1
SERPINA1	0.00711373	0.334405	0.647	0.445	1
MBP	0.00715116	0.308645	0.706	0.557	1
LDHA	0.00738911	0.319732	0.882	0.877	1
C11orf48	0.00778984	-0.310602	0.647	0.906	1
SETD5-AS1	0.00804328	-0.336922	0.765	0.852	1
CLTB	0.00805338	0.463137	1	0.853	1
NDUFA9	0.00816669	-0.269102	0.353	0.606	1
MRPL23	0.00836197	-0.262754	1	0.948	1
ATG3	0.00845276	-0.251346	0.471	0.727	1
MT-ND1	0.00856595	-0.28625	1	0.985	1
S100A3	0.00870722	0.251123	0.412	0.203	1
FBXO32	0.00890218	0.262794	0.588	0.325	1
RPL36AL	0.00906298	0.314092	1	0.983	1
POLD4	0.00920989	0.382129	0.824	0.901	1
CTSB	0.00940798	0.344473	0.882	0.837	1
C1QBP	0.00945393	-0.293976	0.882	0.943	1
MDH2	0.00969757	-0.264471	0.941	0.957	1
NME1	0.00971111	-0.282335	0.824	0.933	1
PTGES2	0.010096	-0.303786	0.765	0.955	1
SHMT2	0.0112218	0.266708	1	0.87	1
STEAP1	0.0115561	-0.256824	0.294	0.624	1
MUC5B	0.0118054	-0.370923	0.118	0.433	1
TMC5	0.011806	-0.431092	0.706	0.858	1
MUC5AC	0.0120728	-0.282813	0.059	0.352	1
OCIAD2	0.013102	0.319953	1	0.984	1
DHPS	0.0131981	-0.250623	0.529	0.684	1
S100A9	0.0133097	-1.01285	0.882	0.912	1
SLPI	0.0133278	-0.601002	0.706	0.895	1
TMBIM6	0.0134076	-0.30745	0.941	0.967	1
CCDC85B	0.0135068	0.391666	0.765	0.688	1
CTNNBIP1	0.0139517	0.319371	0.824	0.665	1
FCGBP	0.0143291	-0.286836	0.118	0.441	1
BEX2	0.0157479	-0.279931	0.588	0.78	1
HIST1H4C	0.0158419	-0.505728	0.765	0.894	1
EIF2AK4	0.0160386	0.262391	0.588	0.385	1
NEAT1	0.0167604	-0.432389	1	0.981	1
TGM2	0.0170326	0.281649	0.412	0.228	1
HSPE1	0.0181897	-0.26786	0.706	0.876	1
POLR2H	0.0193973	-0.260205	0.706	0.833	1
SLC7A11	0.0195641	-0.296628	0.706	0.867	1
PDIA4	0.020505	-0.339507	0.647	0.79	1
SAA1	0.0226355	-0.443779	0.765	0.854	1
SLC38A2	0.0258393	-0.258709	0.765	0.84	1
DCBLD2	0.0271046	0.429154	0.882	0.795	1
BPIFB2	0.027485	-0.322982	0	0.226	1
LGALS3BP	0.0283438	-0.332868	0.647	0.866	1
ADIRF	0.0284009	0.307777	0.706	0.67	1
SLC16A3	0.0285635	-0.262874	0.882	0.963	1
EFHD2	0.0305194	0.319473	0.941	0.931	1
CYCS	0.0316717	-0.264381	0.941	0.965	1
PTPRF	0.0320056	0.31076	0.647	0.463	1
RANBP1	0.0357175	-0.28731	0.941	0.963	1
DUSP5	0.0358825	-0.292649	0.824	0.892	1
SEPW1	0.0379335	0.331213	0.647	0.519	1
CXCL3	0.0395302	-0.454628	0.294	0.531	1
TUBA1A	0.0413021	0.35509	0.294	0.143	1
CD59	0.0417624	0.305749	0.647	0.488	1
HSPB1	0.0425223	0.318407	0.824	0.753	1
FAM89B	0.0432499	0.309342	0.824	0.73	1
TAPBP	0.0436702	0.261785	0.765	0.578	1
FLNA	0.0458953	0.372872	0.882	0.864	1
H2AFZ	0.0501697	-0.358987	1	0.983	1
ST20	0.05232	0.317212	0.588	0.418	1
ACTB	0.0535481	0.31217	1	0.997	1
WARS	0.0552137	-0.27879	0.765	0.865	1
SAT1	0.0575243	-0.281516	1	0.992	1
MALAT1	0.0609466	-0.376514	1	0.996	1
NPC2	0.0730583	0.317112	1	0.956	1
DDX5	0.0746459	-0.265704	0.882	0.955	1
VMP1	0.0785977	-0.262233	0.706	0.912	1
SRD5A3	0.0884555	-0.279384	0.765	0.816	1
S100A13	0.0898491	0.266314	1	0.977	1
UBALD2	0.110036	-0.26248	0.824	0.809	1
CXCL2	0.116287	-0.26393	0.176	0.372	1
DGUOK	0.128168	0.325085	1	0.885	1
NTHL1	0.221316	0.400838	1	0.958	1
NFKBIA	0.233108	-0.313726	1	0.957	1
CTSL	0.25296	0.281504	0.412	0.297	1
CXCL1	0.274661	-0.415715	0.294	0.391	1
TFF3	0.319508	-0.519433	0.647	0.739	1
CTNNB1	0.363026	-0.298804	0.588	0.615	1
HSP90B1	0.427838	-0.250547	1	0.979	1
EMP2	0.511335	0.256964	0.824	0.732	1
CAST	0.569766	0.319156	0.765	0.825	1
CRABP2	0.598168	0.286221	0.824	0.948	1
UBE2S	0.713142	-0.27816	0.882	0.828	1
FABP5	0.816131	0.388126	0.529	0.516	1
PRSS1	0.924453	-0.373304	0.941	0.934	1
