# Supplementary material for: Targeting CDA-Directed Metabolism With 5-Formyl-2'-Deoxycytidine For ALK Inhibitor–Resistant Lung Cancer Therapy
Source: Research Square preprint supplement (doi:10.21203/rs.3.rs-1110449/v1), 2021-12-01
Supplement: Supplementary file 3 [file 7e366ec5e3ece085b04a2819.xlsx]

## Sheet: Sheet1
Supplementary Table 8. Differentially expressed genes in CDA depleted LR cells (also see Fig. 3I).
Gene	LR_ctrl-1	LR_ctrl-2	LR_ctrl-3	LR_CDA_KD-1	LR_CDA_KD-2	LR_CDA_KD-3	logFC	logCPM	LR	P-Value	FDR
CDA	5.62674	5.64734	5.5307	2.13188	2.16602	1.95103	-3.87358	4.67232	1602.59	0	0
TMEM19	5.52951	5.37479	5.64804	2.80471	2.83275	2.89202	-2.86201	4.68028	781.399	5.97326e-172	1.28435e-168
SIAH2	5.44213	5.22358	5.34404	3.05825	2.93989	3.08488	-2.46173	4.54846	666.435	5.95643e-147	7.6844e-144
HIPK1	6.73862	6.45062	6.76506	4.2182	4.29627	4.34876	-2.43072	5.89127	554.791	1.14225e-122	1.05259e-119
UHMK1	7.47988	7.29014	7.4953	5.05156	5.03331	5.14452	-2.38219	6.67058	846.586	4.01499e-186	1.29493e-182
SERPINB3	0.246463	1.342	0.509378	0.21548	0.220056	0.110531	-2.37671	-1.05626	10.6196	0.00111894	0.00454661
SERPINB4	0.340433	1.16601	0.368614	0.181728	0.185633	0.110531	-2.32825	-1.27186	12.7811	0.000350137	0.00164438
SERPINB2	2.04047	1.81322	1.97731	0.808799	0.656933	0.639118	-2.17706	0.849455	106.021	7.29462e-25	3.47262e-23
LRP12	6.93622	6.79018	6.95183	4.76717	4.83935	4.83811	-2.11917	6.18275	797.529	1.859e-175	4.79659e-172
KPNA3	6.94591	6.79947	6.93351	4.90541	4.76844	4.81925	-2.10146	6.18597	762.841	6.47522e-168	1.19338e-164
CDS1	6.11403	6.1557	6.05701	4.03894	4.06492	4.20044	-2.07125	5.39889	749.087	6.33766e-165	1.02203e-161
PKIA	3.61873	3.69038	3.66947	1.92304	1.8516	2.00926	-2.04877	2.86643	322.055	5.16799e-72	1.85201e-69
TGFBR1	4.91879	5.0661	4.9767	3.06289	3.1193	3.1117	-2.02287	4.26507	557.33	3.20247e-123	3.17808e-120
IGSF3	7.63859	7.68635	7.72452	5.62509	5.69813	5.722	-2.02252	6.99485	920.655	3.17561e-202	1.36562e-198
DDAH1	5.96833	5.87388	5.94061	3.93135	4.06255	4.14741	-1.94394	5.24034	606.899	5.28765e-134	5.68467e-131
CPSF4	5.17513	5.15986	5.06261	3.37808	3.24999	3.39258	-1.89902	4.43903	525.514	2.67226e-116	2.15467e-113
PFN2	7.00778	6.99951	6.99886	5.15193	5.08908	5.16066	-1.89797	6.33498	927.966	8.1729e-204	5.27193e-200
TBCEL	3.9937	3.80954	4.03817	2.36779	2.19226	2.3914	-1.85496	3.21648	233.095	1.25995e-52	2.35573e-50
CCNDBP1	4.74498	4.87374	4.65471	3.04891	3.01043	3.08938	-1.8414	4.06744	367.194	7.63963e-82	3.17932e-79
PRSS35	1.42043	0.426594	1.02299	0.312241	0.35008	0.427652	-1.81265	-0.498195	12.5611	0.000393852	0.0018297
NFE2	0.688953	1.32686	0.709427	0.343104	0.253677	0.398898	-1.80704	-0.631391	18.1241	2.0697e-05	0.000131145
PEG10	8.56846	8.01764	8.56735	6.61633	6.64551	6.68576	-1.7674	7.7745	140.866	1.72103e-32	1.21994e-30
FAM73A	5.03343	4.94984	5.12521	3.40393	3.28293	3.46372	-1.75214	4.37317	379.659	1.47622e-84	6.56715e-82
HS6ST2	5.69651	5.70043	5.75795	4.17167	3.93883	4.03978	-1.72679	5.07478	478.565	4.3846e-106	2.97715e-103
LMTK2	5.34911	5.15129	5.41556	3.60513	3.68528	3.76631	-1.70191	4.66342	309.173	3.30701e-69	1.09394e-66
ZNF185	6.92363	7.00517	6.99167	5.25594	5.36863	5.35	-1.67311	6.35719	630.039	4.90279e-139	5.75008e-136
LAMTOR5	5.73523	5.77902	5.61414	4.12803	4.12064	4.06058	-1.6663	5.08147	474.007	4.30352e-105	2.77599e-102
PRKAA1	7.46388	7.43707	7.48148	5.80351	5.83837	5.87468	-1.63891	6.85535	708.75	3.74152e-156	5.36326e-153
PI4K2B	4.97358	5.26091	5.11753	3.70355	3.48399	3.54798	-1.62399	4.48991	239.394	5.33243e-54	1.05836e-51
KCTD20	7.05417	7.01672	7.08855	5.48596	5.3619	5.53893	-1.61119	6.45221	524.951	3.54247e-116	2.68832e-113
CACNA1S	2.55996	2.83594	2.50024	1.48483	1.47773	1.41799	-1.57672	1.82922	85.0043	2.97717e-20	1.02696e-18
MMP13	2.13965	2.12472	2.01559	0.955827	0.971745	1.26706	-1.56369	1.16775	68.1797	1.49258e-16	3.82818e-15
WWTR1	5.21805	5.31562	5.11533	3.79289	3.78062	3.63686	-1.55322	4.60652	311.078	1.27156e-69	4.31695e-67
LEPROTL1	5.2077	5.00914	5.00908	3.58912	3.58319	3.70597	-1.52902	4.46864	278.491	1.60111e-62	4.39488e-60
TREML4	1.18742	1.37181	0.90561	0.542428	0.469349	0.537256	-1.52449	-0.16025	26.826	2.22627e-07	2.0442e-06
SH3BGRL2	4.9809	5.15879	5.02558	3.57294	3.54975	3.70597	-1.52445	4.44798	298.719	6.26337e-67	1.87916e-64
LMAN1	7.31172	7.17544	7.33854	5.83371	5.70042	5.77541	-1.52331	6.69932	428.039	4.3412e-95	2.33357e-92
NUDCD2	4.88929	4.97555	4.94234	3.43291	3.53956	3.53483	-1.51798	4.32525	374.786	1.6989e-83	7.30582e-81
HINT3	4.29691	4.4793	4.46202	3.01577	3.01043	3.03436	-1.51489	3.78568	252.855	6.19473e-57	1.40207e-54
SGMS2	5.07046	5.09431	5.25185	3.77036	3.62554	3.70597	-1.51273	4.53734	303.263	6.40952e-68	1.96879e-65
CHORDC1	7.84355	7.24907	7.76598	6.21103	6.1403	6.09065	-1.50763	7.07087	98.1452	3.88802e-23	1.64998e-21
TRPA1	3.50158	3.30634	3.46338	2.17541	2.12118	2.15394	-1.50207	2.73524	154.335	1.9571e-35	1.53021e-33
ITPRIPL2	6.3313	6.31955	6.31758	4.79952	4.88029	4.87903	-1.50196	5.74281	544.9	1.61963e-120	1.39299e-117
POLR2M	1.57018	1.29609	0.925849	0.488232	0.681845	0.614318	-1.48645	0.0468257	20.923	4.78115e-06	3.46137e-05
CMBL	1.25333	1.38649	1.16597	0.568781	0.579506	0.614318	-1.48522	0.0215273	36.6981	1.37913e-09	1.7686e-08
SULF1	1.54408	3.66953	2.10705	1.69082	1.6004	1.51497	-1.46844	1.96638	5.08571	0.0241238	0.0607485
CDS2	5.47271	5.53736	5.44915	4.09442	4.141	4.04443	-1.44766	4.90829	425.288	1.7237e-94	8.89496e-92
VPS33A	5.79454	5.63893	5.77409	4.38506	4.31232	4.35999	-1.42953	5.1684	365.447	1.83501e-81	7.39794e-79
HABP4	4.08023	3.73694	3.97644	2.5241	2.76442	2.6873	-1.42666	3.30656	115.158	7.26652e-27	3.84203e-25
HYLS1	3.35543	3.04468	3.36675	1.96333	2.10285	2.13663	-1.42651	2.57584	90.8769	1.52891e-21	5.75056e-20
GOLGA1	5.73162	5.59142	5.70916	4.17167	4.38238	4.35626	-1.41857	5.11158	289.876	5.29052e-65	1.51673e-62
CIART	1.8932	1.97736	1.65244	0.873654	1.12493	0.947824	-1.40435	0.885337	43.3235	4.63987e-11	7.06717e-10
PPP1R18	6.80434	6.74782	6.7915	5.33292	5.4749	5.39347	-1.40123	6.23281	442.571	2.98411e-98	1.67383e-95
DRD5	1.34687	0.945837	1.16597	0.594661	0.631582	0.427652	-1.39858	-0.138582	23.9967	9.64988e-07	7.97864e-06
DGKG	1.72918	1.95783	1.824	1.05237	0.909828	0.986989	-1.39548	0.878046	52.1357	5.17942e-13	9.60052e-12
SLC7A5P1	0.888801	1.32686	0.821692	0.645069	0.318656	0.455843	-1.39362	-0.368332	15.1904	9.71968e-05	0.00052598
NUPL1	6.98189	6.92543	7.06051	5.64535	5.6092	5.59546	-1.39177	6.44591	443.489	1.88433e-98	1.10499e-95
FAM104B	2.19939	2.1071	1.824	1.24444	1.16082	1.00618	-1.38366	1.15971	44.8386	2.13965e-11	3.42477e-10
FAM91A1	6.82345	6.7082	6.86343	5.47903	5.40835	5.44096	-1.37721	6.25798	389.542	1.04153e-86	4.79887e-84
RFX7	4.30276	4.28733	4.42339	2.96707	3.17301	3.09387	-1.36703	3.74579	197.714	6.58588e-45	8.32985e-43
TEX19	1.26935	1.37181	1.14886	0.693776	0.579506	0.614318	-1.3537	0.0466628	31.2348	2.28626e-08	2.49324e-07
CLCN5	2.60483	2.13344	2.5854	1.36963	1.46344	1.55461	-1.34964	1.67145	43.4618	4.32307e-11	6.62374e-10
IFT43	3.95461	4.1305	3.90688	2.72493	2.79899	2.83413	-1.3461	3.39491	153.759	2.61511e-35	2.02021e-33
DERL1	6.95088	6.97726	6.88265	5.60692	5.64052	5.60572	-1.33751	6.40783	456.303	3.0651e-101	1.88299e-98
SPIN4	3.38513	3.67252	3.52769	2.4692	2.37903	2.29326	-1.32738	2.89904	106.175	6.75064e-25	3.22556e-23
ETV5	2.39456	2.71903	2.65374	1.67878	1.6263	1.4742	-1.3181	1.8457	60.7068	6.62418e-15	1.46333e-13
SNORD28	0.664938	1.16601	0.426578	0.280703	0.579506	0.213192	-1.31795	-0.833398	6.47796	0.010922	0.0317983
STXBP4	4.08476	3.91708	3.91196	2.73078	2.76442	2.866	-1.3152	3.37481	155.57	1.0509e-35	8.26688e-34
SLC35E1	5.99085	5.98113	5.94805	4.54294	4.78865	4.76817	-1.30259	5.44355	257.302	6.64726e-58	1.58808e-55
COL8A1	5.45881	5.85421	5.59689	4.3475	4.40874	4.40226	-1.30111	5.1112	145.875	1.38281e-33	9.9663e-32
TPGS2	7.24773	7.20057	7.20621	5.9277	5.93803	5.94411	-1.29567	6.70253	485.208	1.57244e-107	1.127e-104
LIFR	6.32317	6.03162	6.37667	4.99559	4.9601	5.00481	-1.29167	5.72851	170.106	7.01537e-39	6.46467e-37
HARS	6.82987	6.65729	6.72809	5.46769	5.45697	5.48864	-1.28823	6.22304	338.376	1.44043e-75	5.30944e-73
DHRS3	5.38814	5.65114	5.41913	4.23886	4.28818	4.23135	-1.2832	4.95829	200.98	1.27658e-45	1.68053e-43
KIAA0195	6.09506	6.39545	6.16471	4.90283	5.02968	4.97347	-1.28197	5.70363	185.233	3.48999e-42	3.82464e-40
RRM2B	4.49721	4.54946	4.48437	3.35555	3.36213	3.25897	-1.2711	3.95215	239.924	4.08668e-54	8.23786e-52
PXK	4.46454	4.44465	4.3504	3.21663	3.18177	3.32541	-1.26948	3.85871	204.654	2.01535e-46	2.68042e-44
CUL4A	7.46779	7.27568	7.4482	6.12485	6.17197	6.13437	-1.26785	6.89311	296.068	2.36794e-66	6.94291e-64
SEL1L3	7.88312	7.67854	7.85492	6.5653	6.55949	6.52997	-1.26564	7.30423	279.524	9.53518e-63	2.6742e-60
TMEM117	1.91373	1.85604	1.98698	1.19454	1.01159	1.13381	-1.25155	1.02413	49.6384	1.84857e-12	3.28944e-11
HIST1H2BK	7.41859	7.72873	7.40515	6.25936	6.27482	6.32219	-1.25042	7.02454	165.147	8.4973e-38	7.21208e-36
SNORD74	0.309785	1.16601	0.535954	0.402918	0.286533	0.339613	-1.24915	-0.965504	5.39535	0.0201905	0.0523679
FAM103A1	4.60842	4.47759	4.45159	3.33267	3.4039	3.32923	-1.24213	3.96428	198.538	4.35438e-45	5.56197e-43
LYN	6.93779	6.86743	6.93757	5.70968	5.65474	5.70448	-1.24089	6.41281	402.012	2.00889e-89	9.96796e-87
IGFN1	1.9638	2.17631	1.90779	0.935718	1.21303	1.40359	-1.23985	1.15952	31.7332	1.7687e-08	1.95526e-07
CPNE8	3.85464	4.0359	3.8311	2.77106	2.89266	2.72832	-1.23568	3.33062	125.021	5.03478e-29	2.99326e-27
CLDND1	7.40053	7.64364	7.41144	6.27545	6.21794	6.30292	-1.23452	6.9933	217.051	3.97785e-49	6.18292e-47
RDX	7.4062	7.20601	7.36611	6.13646	6.03487	6.15601	-1.2305	6.83265	254.686	2.47059e-57	5.7951e-55
LY9	0.988924	1.06012	1.23248	0.568781	0.469349	0.663498	-1.22794	-0.203948	21.4882	3.56013e-06	2.64417e-05
SOST	1.42043	1.06012	1.14886	0.620085	0.552745	0.757096	-1.22468	0.00252562	20.9994	4.59432e-06	3.33923e-05
NEMP1	6.76534	6.56311	6.81509	5.49027	5.52652	5.52486	-1.22268	6.22059	226.107	4.21135e-51	7.34198e-49
SOD2	7.7617	8.20927	7.79721	6.74107	6.76033	6.71156	-1.20733	7.45123	98.2228	3.73869e-23	1.59711e-21
SMC1A	7.58241	7.36154	7.55154	6.26944	6.3042	6.34168	-1.20666	7.01382	239.343	5.47091e-54	1.0694e-51
RASSF8	3.85199	3.62689	3.91196	2.63426	2.717	2.83949	-1.19649	3.2268	94.0195	3.12428e-22	1.24402e-20
SCOC	5.97262	5.98174	6.00683	4.93484	4.75383	4.78494	-1.18905	5.49099	270.802	7.58762e-61	1.99771e-58
FARP2	3.61246	3.25127	3.5343	2.32977	2.45325	2.53706	-1.18809	2.87518	69.2137	8.83528e-17	2.30737e-15
APOL6	6.34223	6.7382	6.4623	5.36617	5.26631	5.43123	-1.18751	6.03476	116.926	2.98026e-27	1.62229e-25
S100A9	4.13151	5.96655	4.34665	3.99103	3.91013	3.89543	-1.18568	4.55085	4.69723	0.0302112	0.0727426
C18orf54	3.0331	2.82521	3.11683	2.07786	1.96757	2.02816	-1.18404	2.3471	69.7167	6.84632e-17	1.80254e-15
QDPR	4.74641	4.68477	4.75002	3.5859	3.61588	3.643	-1.17926	4.20456	242.847	9.41689e-55	1.95947e-52
ENAH	7.28538	6.95435	7.21292	5.98325	5.9882	6.01155	-1.17597	6.6772	165.654	6.58421e-38	5.66286e-36
C5orf30	4.74784	4.72431	4.82197	3.6521	3.6729	3.63993	-1.17542	4.24504	236.54	2.2346e-53	4.30276e-51
LINC01270	2.24869	2.51373	2.27423	1.48483	1.40479	1.5932	-1.16845	1.59492	47.3827	5.83943e-12	9.93859e-11
FAM20A	0.340433	1.40102	0.661954	0.488232	0.440443	0.427652	-1.16499	-0.611391	4.27992	0.0385652	0.0883712
WNT5A	6.83829	6.74034	6.81847	5.64303	5.63335	5.67631	-1.16453	6.32001	341.078	3.71711e-76	1.45316e-73
STYX	5.33301	5.23478	5.41645	4.23681	4.23657	4.16886	-1.15908	4.83087	225.997	4.4507e-51	7.6558e-49
OSGIN1	6.83055	6.75279	6.92694	5.60613	5.779	5.70448	-1.15567	6.36196	226.76	3.03357e-51	5.51212e-49
RNASEL	3.64659	3.7398	3.7196	2.62801	2.7409	2.66332	-1.15407	3.133	134.018	5.41543e-31	3.54642e-29
ANKRD13C	5.8654	5.77763	5.83355	4.69871	4.73758	4.68725	-1.14858	5.3398	307.961	6.07358e-69	1.9111e-66
BPIFB1	0.428654	1.59044	0.755386	0.740891	0.35008	0.510625	-1.14555	-0.33559	3.51734	0.0607297	0.12804
NNT-AS1	4.20205	4.28733	4.2151	3.16142	3.18613	3.20185	-1.14132	3.70304	179.957	4.95283e-41	4.99191e-39
MAPK6	7.40688	7.1815	7.36147	6.22819	6.1637	6.18314	-1.13867	6.85182	218.351	2.07102e-49	3.33978e-47
PLEKHS1	0.688953	2.20143	1.00408	0.786516	0.777403	0.947824	-1.13617	0.40262	3.54234	0.0598212	0.126558
HAT1	6.75079	6.53991	6.72592	5.58611	5.51097	5.57391	-1.13452	6.20383	214.356	1.54042e-48	2.36582e-46
DNAH17	0.949705	1.09628	1.31152	0.594661	0.605779	0.663498	-1.13104	-0.124682	18.0926	2.10415e-05	0.000133132
F2RL2	3.35167	2.90893	3.31014	2.16681	2.21804	2.35444	-1.12903	2.59551	46.625	8.59575e-12	1.43645e-10
PTPRJ	6.74615	6.79741	6.75732	5.67901	5.61164	5.67105	-1.12842	6.29844	339.709	7.38197e-76	2.80102e-73
TMEM155	0.949705	1.09628	0.90561	0.460351	0.35008	0.757096	-1.12354	-0.376651	13.854	0.000197573	0.000994496
SPOCK1	5.72728	5.19155	5.6677	4.41078	4.3975	4.57124	-1.12153	5.06516	58.4086	2.12957e-14	4.4965e-13
RBMS1	5.74027	5.5431	5.70404	4.55287	4.60059	4.57767	-1.12074	5.18468	209.95	1.40835e-47	1.9749e-45
CYBRD1	3.11958	3.70509	3.44597	2.55738	2.43871	2.42031	-1.11656	2.86361	41.4395	1.21576e-10	1.77426e-09
SDCBP2-AS1	1.74071	2.01563	1.60302	1.10734	1.05037	1.13381	-1.11535	0.899119	27.4463	1.6152e-07	1.51547e-06
CCDC25	5.26972	5.22766	5.23066	4.20776	4.2047	4.09907	-1.11525	4.75527	259.325	2.40793e-58	5.86127e-56
MZT1	5.66583	5.49565	5.6908	4.57417	4.57089	4.47293	-1.11365	5.14111	192.667	8.32279e-44	1.01295e-41
ACAT2	6.60656	6.48	6.58111	5.48768	5.42689	5.47407	-1.11135	6.09169	276.56	4.21849e-62	1.13381e-59
CCSAP	3.66487	3.26325	3.41766	2.62801	2.39418	2.44161	-1.11064	2.88145	54.9698	1.22397e-13	2.38887e-12
STK26	6.21517	6.14008	6.29636	5.15628	5.13152	5.10501	-1.10974	5.75019	250.245	2.29616e-56	5.0208e-54
TMEM182	2.66661	2.28998	2.63542	1.70277	1.81828	1.55461	-1.10472	1.84279	36.9668	1.2016e-09	1.54864e-08
HSPA4L	3.94467	3.61448	4.03351	2.83759	2.88195	2.92769	-1.10018	3.33459	66.0192	4.46555e-16	1.10153e-14
SMOC2	2.11327	1.26465	1.96758	1.19454	1.16082	1.02512	-1.09996	0.943544	12.2905	0.00045526	0.00207882
CPEB4	2.62986	2.92912	2.81976	1.83893	1.87339	2.05605	-1.08742	2.1502	50.0143	1.52632e-12	2.73868e-11
LUCAT1	3.27044	3.10362	3.2472	2.24242	2.34824	2.26963	-1.08671	2.61474	82.3663	1.13065e-19	3.74975e-18
PCGF5	6.04244	5.9413	6.07977	5.03275	4.94217	4.93893	-1.07464	5.56248	226.657	3.19423e-51	5.72343e-49
TMEM209	4.53413	4.33919	4.54286	3.52664	3.49105	3.39258	-1.07374	3.97532	125.085	4.87712e-29	2.91295e-27
INIP	4.40416	4.43055	4.45681	3.40758	3.45898	3.42146	-1.0731	3.92922	185.229	3.49824e-42	3.82464e-40
MIR210HG	1.28519	2.4799	1.37177	1.19454	1.19583	1.02512	-1.07107	0.946569	5.72327	0.0167415	0.0450287
SLC9A3R2	7.05388	7.2833	7.04902	6.03556	6.0748	6.11074	-1.07013	6.68552	173.72	1.13974e-39	1.08117e-37
UNKL	6.52469	6.39907	6.58628	5.42505	5.48023	5.45935	-1.06764	6.05366	217.352	3.41929e-49	5.37955e-47
ITGAX	0.888801	1.38649	0.90561	0.620085	0.656933	0.563403	-1.06565	-0.188971	11.6662	0.000636445	0.00278049
CEP120	5.09314	5.05809	5.1967	4.11692	4.07436	4.09907	-1.06478	4.64242	206.828	6.75869e-47	9.1783e-45
SULT1A2	1.54408	1.97736	1.51224	0.873654	1.16082	1.09848	-1.06162	0.773534	17.6517	2.6528e-05	0.000164696
SPP1	4.6147	4.90083	4.60537	3.81783	3.66668	3.643	-1.06067	4.22753	92.2687	7.56718e-22	2.90548e-20
MMD	5.70904	5.69676	5.61881	4.71355	4.5924	4.62809	-1.05993	5.21467	232.261	1.91527e-52	3.52984e-50
LAT2	1.70583	2.0344	1.83474	0.89464	1.34366	1.26706	-1.05806	1.00866	20.736	5.27168e-06	3.77623e-05
PNRC2	5.69799	5.67001	5.66469	4.63623	4.70301	4.62344	-1.05303	5.21922	268.621	2.26747e-60	5.73581e-58
LMO7	6.71871	6.72923	6.72231	5.61485	5.75132	5.70301	-1.04711	6.28037	265.514	1.07801e-59	2.6745e-57
ABCA4	1.49043	2.06209	1.45769	1.228	0.888584	1.04381	-1.04526	0.784469	12.8523	0.00033707	0.0015888
RNF217	4.74641	4.55109	4.70973	3.62095	3.76904	3.66731	-1.04331	4.18948	132.041	1.46565e-30	9.45419e-29
DZANK1	2.35007	2.40258	2.33603	1.56556	1.50591	1.69131	-1.04204	1.6493	50.8537	9.95156e-13	1.81079e-11
ATRAID	6.16254	6.32051	6.01157	5.16926	5.1584	5.12928	-1.0389	5.72411	135.969	2.02715e-31	1.35504e-29
ANXA10	3.7895	3.44952	3.56042	2.68935	2.64914	2.72253	-1.03864	3.06593	66.7799	3.03573e-16	7.57522e-15
LAPTM5	0.969448	1.44376	0.864261	0.620085	0.730415	0.589086	-1.03808	-0.117489	10.3914	0.00126605	0.00506618
C11orf24	5.66129	5.55371	5.70843	4.6095	4.74499	4.57927	-1.02594	5.19237	171.351	3.75139e-39	3.48177e-37
EFCAB14	7.24621	7.12572	7.25202	6.21886	6.1487	6.22418	-1.02141	6.77807	234.601	5.91547e-53	1.12229e-50
TMEM259	6.90164	6.97938	6.82253	5.74477	6.00125	5.92659	-1.02013	6.46985	147.162	7.23325e-34	5.24248e-32
HLA-DQA1	0.781207	1.60306	0.843134	0.669628	0.631582	0.687473	-1.01604	-0.0900917	6.31064	0.0120016	0.0343158
NOC2L	7.276	7.16297	7.28446	6.20684	6.26249	6.23896	-1.01561	6.81326	243.833	5.74108e-55	1.21419e-52
CYP1B1-AS1	1.68209	1.78025	1.5904	0.89464	1.08813	1.20198	-1.01556	0.777224	25.3308	4.82929e-07	4.22105e-06
LINC00536	1.62099	1.13157	1.31152	0.830743	0.777403	0.887007	-1.01556	0.307762	15.3612	8.87933e-05	0.000483955
KIAA0430	5.61582	5.57949	5.6358	4.61741	4.70908	4.56154	-1.00971	5.1651	213.051	2.9669e-48	4.39954e-46
P2RY6	3.31356	3.97407	3.44597	2.57048	2.87656	2.67536	-1.00898	3.07597	24.8048	6.34394e-07	5.44532e-06
CHM	4.60211	4.52976	4.63025	3.69161	3.54636	3.67932	-1.00612	4.11483	147.592	5.82407e-34	4.26911e-32
ANTXR1	6.39702	6.16318	6.33754	5.28505	5.30891	5.35469	-1.00427	5.86934	158.629	2.25518e-36	1.81838e-34
RB1	6.61989	6.52589	6.63127	5.60692	5.58465	5.62058	-1.00384	6.16308	246.176	1.771e-55	3.80795e-53
WWP1	6.74472	6.65084	6.7367	5.7426	5.71708	5.72996	-0.994998	6.28537	254.148	3.23786e-57	7.45922e-55
SORL1	5.97017	6.39045	6.18059	5.21482	5.17494	5.25794	-0.993649	5.75953	84.8118	3.28155e-20	1.12594e-18
RNF185	5.62207	5.73095	5.66168	4.75431	4.6831	4.69022	-0.99023	5.23439	213.425	2.45785e-48	3.68706e-46
DDIT4	6.54374	7.5836	6.59342	5.9808	5.99629	6.06457	-0.987977	6.56987	10.5964	0.0011331	0.00459265
SNORA16A	0.615673	1.21617	0.73259	0.568781	0.469349	0.483494	-0.986038	-0.544189	7.27849	0.00697852	0.0218625
BACH1	6.01242	6.11716	6.08653	5.14538	5.0321	5.14884	-0.983502	5.64343	198.946	3.54699e-45	4.57597e-43
TBL1XR1	7.82995	7.70404	7.83415	6.84243	6.77958	6.82263	-0.981808	7.37571	207.833	4.07977e-47	5.59926e-45
SNAPC5	3.8731	3.83652	3.77643	2.896	3.14641	2.76258	-0.981497	3.32399	64.8405	8.12107e-16	1.96936e-14
ZNF211	4.24723	4.33352	4.31055	3.24142	3.3964	3.51151	-0.979442	3.82049	102.393	4.55345e-24	2.07576e-22
LYPLA2	5.90246	6.02401	5.9973	4.9711	5.09141	4.99764	-0.976655	5.54723	189.104	4.98906e-43	5.78949e-41
PSMC3IP	3.83325	3.80681	3.633	2.99649	2.92953	2.72253	-0.971756	3.25347	67.2968	2.33563e-16	5.86226e-15
SEMA6B	2.0864	2.20971	1.928	1.24444	1.6263	1.31402	-0.969633	1.31798	23.5122	1.24127e-06	1.00714e-05
ENOX2	4.66702	4.82608	4.67428	3.81508	3.7456	3.85631	-0.968908	4.26881	131.513	1.91258e-30	1.20952e-28
HPD	6.46074	6.15677	6.35444	5.36523	5.46147	5.30422	-0.968069	5.90859	108.659	1.92719e-25	9.67418e-24
TCEB1	6.58272	6.46841	6.41476	5.59255	5.49084	5.53067	-0.966833	6.07167	179.881	5.14576e-41	5.14616e-39
SLC26A2	6.44716	6.21601	6.52748	5.44564	5.40181	5.50897	-0.966062	5.9835	111.028	5.83343e-26	2.97459e-24
CBFB	4.91115	4.71416	4.89437	3.81508	3.95425	3.99725	-0.965261	4.39237	110.82	6.47962e-26	3.29109e-24
UBE2N	6.9758	6.91471	6.926	5.99544	5.92895	6.02866	-0.965159	6.52494	240.991	2.39132e-54	4.89689e-52
BBX	7.63435	7.35828	7.65234	6.57265	6.62116	6.59598	-0.964994	7.14415	116.646	3.432e-27	1.85256e-25
TMTC2	3.47074	3.64226	3.45644	2.70131	2.64914	2.67536	-0.964267	3.00255	77.4793	1.34121e-18	4.06287e-17
TSPAN2	5.58495	4.89443	5.54304	4.5279	4.32225	4.46775	-0.964185	4.93825	27.1237	1.90847e-07	1.77386e-06
FAM35A	5.66129	5.55858	5.64193	4.64554	4.6456	4.76395	-0.962426	5.19175	183.181	9.79416e-42	1.05295e-39
RBM12	6.78775	6.95651	6.73599	5.82963	5.87056	5.94162	-0.960385	6.4165	150.09	1.65716e-34	1.25024e-32
FNDC3A	6.48709	6.33146	6.53038	5.48596	5.52394	5.51986	-0.957512	6.03625	167.714	2.33611e-38	2.05021e-36
MIR3064	0.758691	1.13157	0.843134	0.460351	0.579506	0.589086	-0.957098	-0.453377	10.3747	0.00127753	0.00511053
CRADD	2.41631	2.50029	2.40253	1.72638	1.77263	1.64309	-0.955342	1.77127	46.785	7.92171e-12	1.32897e-10
RAP2A	6.13822	6.07304	6.12423	5.21377	5.13378	5.18086	-0.954878	5.69302	221.573	4.1054e-50	6.87842e-48
DEK	8.80856	8.65318	8.7962	7.84811	7.75164	7.81352	-0.95247	8.35227	166.467	4.3741e-38	3.81286e-36
MBNL1	7.79649	7.63157	7.76493	6.79891	6.77921	6.78284	-0.952026	7.32766	187.284	1.24516e-42	1.40911e-40
GPR137B	2.9108	2.86244	2.9735	2.14945	1.98769	2.24561	-0.951812	2.32949	52.6914	3.90297e-13	7.30801e-12
SNORA1	0.51179	1.14889	0.482302	0.43192	0.469349	0.398898	-0.95	-0.810808	4.64114	0.0312142	0.0745454
PRSS23	9.32993	8.96743	9.34123	8.28098	8.25327	8.29794	-0.947713	8.82339	79.5245	4.76293e-19	1.50604e-17
CDCA4	6.31114	6.17326	6.36235	5.43225	5.30089	5.32825	-0.946478	5.87041	149.362	2.39023e-34	1.78245e-32
NPAT	4.25529	4.28538	4.38188	3.37061	3.4225	3.50141	-0.941164	3.8449	115.554	5.95281e-27	3.17344e-25
IL1RAP	3.81427	4.00769	3.77643	3.02532	2.89266	3.12493	-0.939405	3.38145	66.7359	3.10428e-16	7.73134e-15
C9orf89	5.43682	5.72663	5.52574	4.69274	4.66135	4.61721	-0.938345	5.14591	109.281	1.4086e-25	7.09856e-24
HRASLS	2.19939	2.21794	1.87694	1.4427	1.40479	1.48792	-0.937803	1.36323	26.3414	2.86096e-07	2.59376e-06
NUDT11	3.70958	3.439	3.72538	2.843	2.88195	2.65726	-0.93581	3.12572	52.556	4.18154e-13	7.81826e-12
STARD3NL	6.30046	6.22981	6.23229	5.40965	5.29586	5.30325	-0.934374	5.84431	193.85	4.59252e-44	5.64267e-42
SAA1	1.86186	3.50775	2.15927	2.04068	1.90547	1.91086	-0.933676	2.08528	3.36376	0.0666458	0.13795
DPY19L4	5.7251	5.70264	5.70916	4.82707	4.83797	4.74551	-0.933097	5.29453	210.886	8.80233e-48	1.26177e-45
CBR3	5.20562	5.134	5.13611	4.24704	4.23657	4.31261	-0.928904	4.73044	183.057	1.04206e-41	1.11104e-39
CTSO	2.91589	3.52111	2.98319	2.4692	2.16602	2.46953	-0.928891	2.61951	19.7196	8.96787e-06	6.17366e-05
NOB1	5.85615	5.83361	5.94682	4.95995	5.04175	4.91882	-0.927312	5.4667	173.416	1.3278e-39	1.2413e-37
USB1	5.83949	5.84494	5.8842	4.917	4.9109	5.02377	-0.926897	5.44306	194.479	3.34793e-44	4.15304e-42
DIAPH3	6.59826	6.28765	6.64163	5.57884	5.53595	5.69564	-0.926504	6.11295	79.309	5.31169e-19	1.67137e-17
C3	4.373	5.33845	4.44634	3.86112	3.92846	3.94102	-0.925151	4.35152	11.3662	0.000747912	0.00319709
KCNAB2	3.66184	4.24567	3.66947	3.03952	3.08703	3.0108	-0.924739	3.40379	27.1856	1.8483e-07	1.72165e-06
CAMKK1	5.45881	5.66174	5.5414	4.6095	4.75969	4.60468	-0.924021	5.1388	123.484	1.09238e-28	6.31963e-27
MFSD8	3.71835	3.86562	3.54087	2.90637	2.79328	2.95757	-0.921409	3.22109	56.1079	6.86014e-14	1.37855e-12
RNF11	6.23264	6.15784	6.23229	5.36523	5.31788	5.22658	-0.920991	5.80182	180.559	3.65842e-41	3.71632e-39
KRT8	11.1087	11.0291	11.1606	10.1651	10.1929	10.1845	-0.920185	10.7119	177.901	1.3923e-40	1.36076e-38
GPT2	4.83517	4.96091	4.90077	3.90315	4.072	4.08561	-0.919646	4.46709	123.196	1.26329e-28	7.27579e-27
ZNF268	5.80694	5.83829	5.90282	4.95246	4.87354	5.03081	-0.918012	5.43957	166.122	5.20262e-38	4.50463e-36
IL11	2.88504	2.70153	2.59175	1.90247	2.13026	1.94109	-0.917695	2.12785	35.7645	2.22672e-09	2.78632e-08
ALDOC	2.80489	3.65747	2.86762	2.31428	2.46047	2.37673	-0.915393	2.62212	12.493	0.00040849	0.00188523
SEC14L1P1	1.18742	1.53881	1.13153	0.873654	0.800335	0.801712	-0.913772	0.227767	13.121	0.000292008	0.00139578
CDK6	7.35012	6.64208	7.37165	6.22456	6.27482	6.27204	-0.910169	6.76491	22.2056	2.4496e-06	1.87218e-05
LINC00639	1.11836	1.24867	1.00408	0.808799	0.706334	0.589086	-0.909662	-0.0560468	13.26	0.000271126	0.00130661
MFAP3L	1.86186	1.51228	1.88729	1.16029	1.23002	1.1683	-0.907227	0.920034	19.2712	1.13404e-05	7.57653e-05
UBA7	0.803377	1.5777	1.114	0.830743	0.730415	0.711056	-0.90557	0.0714785	6.81222	0.00905363	0.0271291
ZFPM2-AS1	2.8954	3.18564	2.9976	2.2587	2.29271	2.26963	-0.903104	2.47651	45.3203	1.67304e-11	2.71155e-10
SNORA32	1.39146	1.98702	1.28042	0.935718	1.27982	0.907565	-0.902753	0.672831	7.64754	0.00568499	0.0184091
EPG5	5.57129	5.30793	5.68041	4.59835	4.68464	4.67531	-0.901732	5.11768	77.0531	1.66424e-18	5.00474e-17
NFIB	3.27442	3.0354	3.33305	2.53082	2.37139	2.43454	-0.900522	2.68835	45.2956	1.69427e-11	2.74251e-10
REEP3	6.46074	6.36009	6.43431	5.60851	5.46506	5.5348	-0.89599	6.02391	168.692	1.42853e-38	1.28877e-36
USP6NL	4.53744	4.47071	4.56239	3.72714	3.65414	3.66127	-0.895525	4.08581	130.585	3.05198e-30	1.92067e-28
XPO7	6.67992	6.63364	6.70339	5.79447	5.80546	5.7684	-0.895183	6.28034	219.669	1.06807e-49	1.74419e-47
LSM14A	7.72932	7.57562	7.66763	6.75476	6.7607	6.796	-0.894379	7.27337	173.989	9.95595e-40	9.5852e-38
STK40	6.47203	6.45846	6.46532	5.59255	5.56469	5.60493	-0.891589	6.07223	225.233	6.5319e-51	1.10879e-48
SESN3	2.09541	2.1071	2.12467	1.56556	1.38975	1.4742	-0.889874	1.38301	33.4654	7.25447e-09	8.47735e-08
C9orf41	4.09827	3.84717	4.01946	3.23731	3.17739	3.12053	-0.887756	3.52937	71.1218	3.35844e-17	9.14076e-16
NSMAF	6.29166	6.17749	6.23178	5.35769	5.39052	5.34342	-0.886553	5.84049	184.554	4.9098e-42	5.32281e-40
TMEM55A	2.85882	2.79251	2.70148	2.21766	2.07491	1.89035	-0.885543	2.20213	37.399	9.62705e-10	1.25453e-08
ENOPH1	6.42901	6.25653	6.40758	5.51081	5.47934	5.4963	-0.88551	5.97439	154.048	2.26061e-35	1.75687e-33
CABYR	2.52035	2.70739	2.68969	1.97323	1.8516	1.99011	-0.884385	2.03481	40.6892	1.78472e-10	2.53575e-09
SPRED3	1.9035	1.76909	2.12467	1.2607	1.40479	1.3595	-0.883535	1.16583	21.6017	3.3555e-06	2.50662e-05
FEZ2	5.86145	5.85355	5.72729	4.93357	4.97025	4.96	-0.882083	5.41702	162.467	3.27118e-37	2.67098e-35
TXNL1	6.07584	6.04208	6.05356	5.2221	5.1826	5.17981	-0.880292	5.66318	205.059	1.64368e-46	2.20887e-44
SOCS5	4.58781	4.50307	4.63025	3.67654	3.74264	3.81065	-0.880087	4.14391	114.154	1.20546e-26	6.29621e-25
SQSTM1	11.3414	11.2452	11.3283	10.4309	10.4498	10.3971	-0.879981	10.9312	169.804	8.16425e-39	7.47e-37
CFB	5.71417	7.35572	5.93063	5.6873	5.63654	5.66578	-0.879918	6.14203	3.44778	0.0633368	0.132261
PDE4D	2.64835	3.01665	2.55973	2.14945	1.99765	1.98044	-0.879514	2.16941	24.7164	6.64167e-07	5.68153e-06
EEF1E1	2.96097	2.88329	2.88323	2.33745	2.18357	2.01874	-0.875617	2.34788	41.5696	1.13748e-10	1.66757e-09
YIPF4	4.55715	4.57532	4.58165	3.70948	3.73075	3.79694	-0.874609	4.14243	136.075	1.92124e-31	1.29769e-29
MFN1	6.32653	6.11496	6.25896	5.38297	5.32975	5.41965	-0.87393	5.84668	128.964	6.90525e-30	4.30361e-28
OSBPL5	2.50014	3.39249	2.43113	2.05939	2.356	1.94109	-0.873019	2.27437	7.5011	0.00616613	0.019754
RAB18	5.75811	5.52165	5.63734	4.87801	4.81422	4.68279	-0.8721	5.24434	97.9399	4.31268e-23	1.80643e-21
TNRC6C	3.67392	3.25927	3.79029	2.78236	2.73496	2.92265	-0.871838	3.10607	28.9422	7.45707e-08	7.45765e-07
KDM1B	5.36969	5.11098	5.40388	4.48011	4.51999	4.37483	-0.871111	4.89583	81.1158	2.12869e-19	6.93491e-18
DTWD2	3.44629	3.40696	3.531	2.73078	2.68655	2.66935	-0.870836	2.96556	72.0629	2.08441e-17	5.73369e-16
UBE2L6	4.5424	5.11208	4.47753	3.85578	3.99954	3.87991	-0.870818	4.31874	24.5307	7.31348e-07	6.19103e-06
MID1	7.10971	6.90232	7.13601	6.16103	6.19162	6.2247	-0.869295	6.67292	123.939	8.68897e-29	5.04939e-27
AEBP2	5.33681	5.29923	5.29431	4.49221	4.39562	4.52042	-0.869223	4.90625	162.759	2.82441e-37	2.32087e-35
E2F4	6.2504	6.25653	6.23331	5.36147	5.47934	5.3368	-0.868613	5.85937	168.227	1.80489e-38	1.59485e-36
VTI1A	4.92005	4.87504	4.88535	4.08987	4.03381	4.06973	-0.868214	4.47848	157.316	4.36519e-36	3.47626e-34
UBE2D1	4.77334	4.84878	4.72569	4.15438	3.86733	3.835	-0.866256	4.36542	70.8386	3.87683e-17	1.04853e-15
LDLRAD4	1.1533	1.11403	1.16597	0.740891	0.845134	0.614318	-0.861405	-0.00989757	13.3261	0.00026174	0.00126944
ATXN10	7.53847	7.42867	7.53434	6.65182	6.59107	6.6965	-0.860681	7.12696	162.768	2.81058e-37	2.32087e-35
MCM6	6.86488	6.91851	6.86212	6.06305	5.97125	6.06228	-0.859045	6.50428	190.414	2.58258e-43	3.05668e-41
S100P	2.35758	3.68445	2.39529	2.41938	2.19226	2.08341	-0.858819	2.40429	3.91529	0.0478486	0.105484
SEC22B	6.41782	6.37535	6.45796	5.61248	5.5005	5.60493	-0.857378	6.03592	168.257	1.77739e-38	1.58502e-36
ERLIN1	7.00838	6.81039	6.97538	6.11873	6.06241	6.07711	-0.857157	6.55723	138.964	4.48403e-32	3.11013e-30
CA5BP1	2.69653	2.64771	2.7814	1.99283	1.97767	2.09242	-0.855014	2.1245	43.8054	3.62696e-11	5.63074e-10
SNORD22	0.781207	1.16601	0.612867	0.43192	0.552745	0.639118	-0.854432	-0.516278	5.9902	0.0143856	0.0398516
RARRES3	0.949705	1.74651	1.00408	0.808799	0.909828	0.801712	-0.852661	0.222354	5.39363	0.0202104	0.0523998
ARHGAP29	5.48562	5.36833	5.534	4.59194	4.58911	4.73261	-0.850602	5.07042	116.978	2.90311e-27	1.58699e-25
P3H4	4.94893	4.87504	4.93363	4.08075	4.16328	4.07882	-0.84918	4.51205	140.479	2.09155e-32	1.47449e-30
ZNF746	4.64877	4.68477	4.69064	3.86378	3.88889	3.85895	-0.848745	4.25908	139.522	3.38585e-32	2.36113e-30
CYP2B7P	1.04582	1.81322	1.09625	1.01452	0.909828	0.779576	-0.848668	0.35377	5.72513	0.0167238	0.0450238
ZNF468	3.94716	3.79311	3.97158	3.09043	3.12839	3.17667	-0.848531	3.4517	74.7597	5.31628e-18	1.53092e-16
SHOC2	5.06244	4.94116	5.07512	4.18025	4.12292	4.33175	-0.847635	4.62371	101.279	7.98935e-24	3.60387e-22
AGPS	9.00616	8.86592	8.99127	8.15741	8.07815	8.10491	-0.84424	8.59191	139.728	3.05254e-32	2.14026e-30
HHIPL2	3.41783	3.87085	3.52106	2.896	3.02023	2.65118	-0.843432	3.14274	26.1718	3.12354e-07	2.81795e-06
KIAA1462	7.05446	6.6049	7.12812	6.09286	6.10907	6.13655	-0.843266	6.57533	41.2392	1.34691e-10	1.95241e-09
CYP1B1	7.28563	7.31049	7.30029	6.46846	6.46129	6.45993	-0.842841	6.92968	210.227	1.22582e-47	1.73783e-45
E2F7	5.746	5.62352	5.70843	4.86478	4.91747	4.83543	-0.842578	5.30708	150.992	1.05245e-34	7.98682e-33
AKR1B10	6.49817	6.86971	6.59183	5.93595	5.76304	5.79071	-0.841291	6.28871	62.6128	2.51618e-15	5.75553e-14
EPB41L4B	5.09314	5.02798	5.15123	4.25315	4.35554	4.23948	-0.841245	4.69209	128.501	8.72195e-30	5.38382e-28
CUL4B	6.77974	6.73426	6.75908	5.92196	5.86853	5.98882	-0.840904	6.38545	178.215	1.18908e-40	1.17101e-38
LGR4	6.00885	6.0415	5.99969	5.19909	5.19455	5.18718	-0.840644	5.63623	189.427	4.2402e-43	4.97299e-41
ABCC4	6.69852	6.59545	6.78701	5.8479	5.8363	5.91268	-0.84064	6.32299	136.049	1.94687e-31	1.30816e-29
KIAA0895	3.9937	3.88901	4.04512	3.2937	3.16861	3.15533	-0.840541	3.53043	76.0014	2.83464e-18	8.38756e-17
SNX7	4.78313	4.72142	4.62871	3.92881	3.8482	3.97307	-0.837062	4.30216	104.803	1.34879e-24	6.37389e-23
MKRN1	5.98601	5.8188	5.83154	5.11105	5.02482	5.0529	-0.836408	5.49967	126.164	2.83055e-29	1.7064e-27
IFI44	1.17046	2.05292	1.24864	1.12521	0.991807	1.04381	-0.835877	0.639799	5.40383	0.0200926	0.0521873
SLCO2B1	5.20977	5.44045	5.28651	4.48876	4.47793	4.55992	-0.834036	4.92417	102.611	4.0777e-24	1.86548e-22
SRRM1	6.96232	6.90646	6.88168	6.0326	6.0391	6.20147	-0.83319	6.54892	138.605	5.37319e-32	3.70693e-30
ARF6	7.22301	7.13824	7.20155	6.31491	6.34083	6.43093	-0.832591	6.82187	164.717	1.05448e-37	8.83363e-36
SNORA73B	0.428654	1.52561	0.685886	0.568781	0.631582	0.639118	-0.830054	-0.335272	2.34966	0.12531	0.225908
TNFRSF10A	4.0341	4.08172	4.1195	3.29765	3.38506	3.25897	-0.828988	3.64222	89.8104	2.62116e-21	9.68928e-20
ADAM10	7.31172	7.1009	7.32121	6.47108	6.37656	6.4389	-0.826015	6.8847	109.356	1.35628e-25	6.86171e-24
CES1	4.98817	5.91369	5.13936	4.68974	4.56588	4.56478	-0.824667	5.02099	10.9057	0.000958706	0.00397566
C1orf109	4.90476	4.78235	4.99837	4.1012	4.08139	4.14741	-0.824166	4.49855	98.1518	3.87505e-23	1.6499e-21
BNIP3	4.5782	4.78235	4.59435	3.86909	3.86189	3.89028	-0.824153	4.2469	89.1053	3.74352e-21	1.37202e-19
SERP1	7.03673	6.93607	6.94285	6.22249	6.11366	6.13437	-0.823755	6.60815	157.597	3.79108e-36	3.03781e-34
LMNTD2	1.67008	1.70026	1.34196	1.19454	1.03111	1.02512	-0.823141	0.688646	14.0143	0.000181422	0.000923647
LGALS9	0.309785	1.09628	0.145167	0.343104	0.318656	0.398898	-0.822732	-1.18144	1.39907	0.23688	0.368547
PLEKHA3	5.79108	5.539	5.72729	4.91058	4.89634	4.86333	-0.820681	5.31098	98.9312	2.61425e-23	1.14327e-21
ZC3H12C	5.31768	5.06038	5.24079	4.41442	4.39938	4.44683	-0.81922	4.82167	92.8267	5.708e-22	2.21138e-20
PRKAA2	3.81154	3.71385	3.86556	3.144	3.16419	2.83949	-0.819092	3.3471	46.6969	8.28581e-12	1.38645e-10
MXD4	3.425	4.38924	3.50096	3.05825	3.18613	3.04831	-0.817508	3.39432	8.77541	0.00305319	0.0109021
LRRC58	6.37174	6.10999	6.4352	5.48423	5.50313	5.54057	-0.816552	5.9443	77.5028	1.32536e-18	4.0467e-17
FUBP3	7.48525	7.43111	7.42883	6.63321	6.62679	6.66251	-0.813917	7.09071	180.875	3.1221e-41	3.22225e-39
PRKD3	6.62651	6.54769	6.63933	5.80282	5.74098	5.86091	-0.813716	6.24112	151.954	6.48391e-35	4.94964e-33
HIPK3	4.95266	5.03732	4.93612	4.20566	4.21327	4.17099	-0.813597	4.58303	131.937	1.54462e-30	9.91402e-29
HDAC4	3.41783	3.12566	3.34061	2.56395	2.65544	2.56321	-0.811468	2.80816	41.5909	1.12515e-10	1.65138e-09
PPP1R12A	6.90612	6.76091	6.91528	6.03969	6.0397	6.10296	-0.810635	6.50191	138.323	6.19391e-32	4.2504e-30
AMMECR1	5.66129	5.55045	5.69964	4.76432	4.86133	4.92261	-0.809116	5.26301	113.602	1.59279e-26	8.25246e-25
CCDC171	1.72918	1.32686	1.60302	1.05237	1.06938	1.11626	-0.809014	0.668627	13.8371	0.000199357	0.00100191
RUNX2	5.09088	4.80301	5.09871	4.11915	4.34193	4.21907	-0.807739	4.61383	57.5184	3.34835e-14	6.95605e-13
VIMP	4.82843	4.67135	4.68916	4.0413	3.91276	3.93852	-0.805908	4.33296	92.8495	5.6427e-22	2.19267e-20
RECQL	6.43301	6.47872	6.5171	5.7368	5.63495	5.6778	-0.804856	6.11468	156.445	6.76862e-36	5.35717e-34
MIR17HG	1.74071	1.96763	1.67653	1.36963	1.449	0.967539	-0.803459	1.00604	11.8087	0.000589533	0.00260197
ICAM5	2.33493	3.02136	2.65979	1.87105	2.26825	1.99011	-0.802976	2.13083	11.9787	0.000538126	0.0024022
SEC24D	5.07275	5.27577	5.13828	4.47315	4.33801	4.36186	-0.801996	4.78127	94.2518	2.7783e-22	1.10969e-20
SRPR	7.17334	7.12299	7.1637	6.36323	6.40021	6.31355	-0.801615	6.79833	174.168	9.0958e-40	8.82292e-38
NFATC2IP	5.85682	5.96043	5.95546	5.06087	5.17823	5.18192	-0.8011	5.55736	128.922	7.05408e-30	4.37523e-28
DNAJB4	5.49331	4.97798	5.43598	4.58227	4.54056	4.51373	-0.800795	4.94091	35.4995	2.55116e-09	3.15253e-08
ZBED6CL	2.79939	2.86768	2.94898	2.23422	2.21804	2.18796	-0.798055	2.3339	42.9061	5.74319e-11	8.69635e-10
CYP27A1	1.54408	2.08926	1.73504	1.14285	1.34366	1.3595	-0.797454	1.0183	11.3563	0.000751916	0.00321314
EGR2	3.71251	2.02504	3.52769	2.67729	2.58455	2.43454	-0.796374	2.76763	2.88686	0.0893049	0.17372
POLR2D	6.07242	5.90607	6.02571	5.25696	5.20318	5.20909	-0.796193	5.63835	124.879	5.4107e-29	3.18737e-27
ABCG1	0.664938	1.19964	0.637619	0.515584	0.497687	0.639118	-0.796145	-0.525552	4.77464	0.0288818	0.07021
TNIP3	2.20772	3.00243	2.45221	1.97323	1.91601	1.99972	-0.795327	2.00962	10.8162	0.00100617	0.00414185
PRKCH	5.19727	5.20404	5.22045	4.37576	4.42911	4.51541	-0.794204	4.82769	133.656	6.49732e-31	4.23343e-29
AKAP5	1.34687	1.52561	1.62794	1.03357	0.991807	1.09848	-0.792771	0.589575	14.9057	0.000113022	0.000600783
WAC	7.03439	6.80426	6.97021	6.20159	6.12959	6.13492	-0.792294	6.58621	107.376	3.68277e-25	1.81341e-23
LOC100129550	1.20418	1.11403	1.14886	0.808799	0.867023	0.639118	-0.788452	0.0347284	11.4322	0.000721814	0.00309476
AHRR	5.03928	5.20196	5.18521	4.37762	4.49209	4.27947	-0.787875	4.76513	85.8443	1.94677e-20	6.8809e-19
HADH	5.05899	5.14159	5.04768	4.3943	4.31032	4.27354	-0.786898	4.70315	118.562	1.3058e-27	7.19918e-26
RBBP4	7.43333	7.55769	7.41726	6.67816	6.63598	6.75404	-0.786403	7.12303	123.129	1.30699e-28	7.494e-27
RPS6KA5	2.66661	2.68381	2.59175	1.99283	1.95741	2.10137	-0.786255	2.07673	37.0828	1.13217e-09	1.46648e-08
DHRS2	4.55552	3.09023	4.42161	3.50633	3.39263	3.37793	-0.785979	3.73846	4.041	0.0444075	0.0991917
DNAJB14	5.05438	5.04543	5.08416	4.3943	4.3003	4.22317	-0.784673	4.68141	115.228	7.0161e-27	3.72489e-25
CGNL1	3.04711	3.15596	3.20227	2.44806	2.49602	2.45564	-0.783394	2.637	47.5774	5.28758e-12	9.03512e-11
CLDN10	1.4767	2.32088	1.52557	1.19454	1.37455	1.3595	-0.782914	1.05275	5.78956	0.0161216	0.0436485
SLC22A18	3.03779	3.6785	3.12122	2.60909	2.67419	2.59525	-0.782782	2.82793	16.2275	5.61729e-05	0.00032194
TBC1D23	5.16339	5.31082	5.2276	4.60314	4.41246	4.41488	-0.782771	4.86053	89.9679	2.42057e-21	8.9735e-20
FMN1	6.12837	5.92631	6.17954	5.25493	5.33467	5.35282	-0.782588	5.72353	86.3055	1.54182e-20	5.50996e-19
ASAP1	7.47039	7.1339	7.47162	6.57955	6.57661	6.62032	-0.781084	7.02076	63.5109	1.59485e-15	3.70723e-14
AFG3L1P	4.54897	4.40194	4.50132	3.71834	3.80633	3.72347	-0.780994	4.08639	88.9442	4.06097e-21	1.48415e-19
TACC1	6.13002	5.89841	6.18112	5.25594	5.31688	5.35563	-0.780126	5.71718	77.4959	1.32998e-18	4.0467e-17
CLCN3	6.80331	6.72815	6.7773	6.03674	5.97314	5.99423	-0.777651	6.42063	163.193	2.26987e-37	1.88927e-35
LOC374443	2.67264	2.99765	2.87805	2.2748	2.2009	2.16252	-0.777605	2.32108	29.5216	5.52956e-08	5.65268e-07
UBE2W	5.31479	5.31754	5.37197	4.62214	4.58416	4.54851	-0.774921	4.96564	140.868	1.71991e-32	1.21994e-30
VSIG10L	3.25444	3.94462	3.18138	2.843	2.82158	2.79052	-0.771534	3.0455	12.1442	0.000492408	0.00221729
TFB2M	4.68803	4.57692	4.66679	3.89014	3.86733	3.98521	-0.769235	4.25645	94.5171	2.42983e-22	9.73516e-21
C17orf75	3.77274	3.6785	3.68142	3.06289	3.01043	2.98685	-0.766051	3.27311	66.4508	3.58728e-16	8.8658e-15
SP140	2.50691	2.2504	2.3807	1.83893	1.74925	1.80526	-0.765643	1.76766	26.1421	3.17188e-07	2.85957e-06
MPZL3	3.86522	3.99098	3.8311	3.10401	3.30715	3.17667	-0.765403	3.47254	56.1092	6.85543e-14	1.37855e-12
TBC1D14	6.88841	6.81073	6.94161	6.13426	6.1637	6.08446	-0.761922	6.53871	136.961	1.22991e-31	8.3511e-30
LINC00460	1.25333	1.14889	1.28042	0.935718	0.930764	0.639118	-0.761834	0.166521	10.5221	0.00117957	0.00476297
MBTD1	4.90219	5.0558	4.92862	4.32834	4.11379	4.25361	-0.76054	4.58972	78.2602	9.03231e-19	2.79438e-17
PNRC1	3.07471	3.52111	3.18138	2.7366	2.59114	2.49692	-0.760148	2.796	22.7885	1.80847e-06	1.42176e-05
HIF1A	8.90583	8.77384	8.87451	8.11137	8.08895	8.08403	-0.759804	8.51916	124.246	7.44297e-29	4.34488e-27
DUSP22	3.72708	3.93467	3.6113	3.113	3.0055	3.10727	-0.75914	3.33201	41.1642	1.39961e-10	2.01973e-09
ABCC5	6.65613	6.61194	6.7612	5.90461	5.97629	5.90631	-0.75807	6.33495	124.662	6.0339e-29	3.53834e-27
TMEM101	4.70137	4.87374	4.66679	4.02474	4.072	3.99485	-0.75578	4.37089	77.6029	1.25984e-18	3.87905e-17
ZNF439	1.0643	1.65248	1.26462	0.995222	0.845134	0.967539	-0.753729	0.363672	7.36828	0.00663846	0.0209971
PISD	5.68013	5.86474	5.65941	4.99559	5.04536	4.96613	-0.753483	5.38453	91.1422	1.33706e-21	5.0585e-20
C1R	4.44704	5.26588	4.62871	4.20776	4.09537	4.00919	-0.752853	4.44929	12.2118	0.000474871	0.00215412
CYLD	4.16828	4.09965	4.26362	3.58267	3.39263	3.45677	-0.752375	3.77546	62.548	2.60026e-15	5.93734e-14
LOC101928994	2.72584	2.55329	2.91395	2.19245	2.08429	2.10137	-0.751969	2.19512	24.6827	6.75878e-07	5.75545e-06
ZNF367	5.35381	5.32898	5.34216	4.66094	4.61035	4.57124	-0.751102	4.98127	135.23	2.94076e-31	1.9556e-29
RIMKLA	1.44884	1.72357	1.4988	1.16029	1.17843	0.986989	-0.750926	0.688809	13.2284	0.000275744	0.00132491
TESK2	1.74071	1.79133	1.91793	1.33934	1.41968	1.20198	-0.750844	1.04996	17.8632	2.37369e-05	0.000148773
APOL3	1.10056	1.73509	0.945807	0.915325	0.822909	0.967539	-0.750369	0.292083	4.70971	0.0299926	0.0723919
SUSD3	1.28519	1.11403	1.114	0.935718	0.730415	0.734259	-0.749126	0.0778067	10.0968	0.00148528	0.0058242
ZBTB41	4.83248	4.80438	4.91223	4.13687	4.14324	4.12783	-0.747943	4.47746	108.325	2.28074e-25	1.14046e-23
HMGB1	9.8237	9.62861	9.80242	9.0569	8.94062	9.02273	-0.747739	9.42669	87.7662	7.36678e-21	2.66762e-19
PTPDC1	3.67693	3.49764	3.65135	3.06752	2.82717	2.91759	-0.747358	3.17123	43.4418	4.36755e-11	6.67604e-10
DAB2IP	4.58461	4.57532	4.72136	3.83693	3.88621	4.03044	-0.747147	4.248	70.7831	3.98736e-17	1.07617e-15
U2SURP	7.95869	7.78122	7.93729	7.16717	7.1164	7.17398	-0.74586	7.56368	105.303	1.04809e-24	4.97111e-23
CA13	1.81897	2.1071	1.70022	1.42838	1.26341	1.44637	-0.74516	1.14263	13.524	0.000235531	0.00115623
TRAPPC4	3.93717	3.86824	3.82573	3.32882	2.95018	3.28277	-0.74496	3.45906	37.2956	1.01516e-09	1.31889e-08
PAK3	1.70583	1.56485	1.81318	1.228	1.27982	1.1683	-0.744459	0.885856	16.0736	6.09273e-05	0.000345961
NR1D1	3.75863	3.58296	3.56042	2.896	3.07297	2.93271	-0.743758	3.20065	44.9442	2.02727e-11	3.26107e-10
SNORD102	1.1533	0.777855	0.864261	0.488232	0.706334	0.687473	-0.742979	-0.343098	6.44549	0.0111235	0.0322263
TRIM16L	7.20829	7.08609	7.26672	6.42223	6.39739	6.53782	-0.741738	6.85611	98.0254	4.13056e-23	1.74145e-21
LIN54	5.56967	5.34504	5.57863	4.85143	4.77713	4.71376	-0.741057	5.14859	72.7421	1.47749e-17	4.13473e-16
SNORD5	1.02711	1.65248	1.24864	0.873654	1.05037	0.866151	-0.740695	0.34387	6.46191	0.0110211	0.0319729
RAD18	5.20145	4.90848	5.2019	4.4644	4.30832	4.41846	-0.739315	4.74848	54.1465	1.86086e-13	3.60465e-12
MSC	5.53449	5.69823	5.51909	4.81749	4.91485	4.86727	-0.739143	5.23554	92.9483	5.36776e-22	2.10485e-20
ATP8A1	2.70833	2.94409	2.92405	2.36026	2.16602	2.22118	-0.737219	2.34396	28.4514	9.60792e-08	9.39741e-07
DUSP13	1.0643	1.47156	1.21614	0.873654	1.03111	0.711056	-0.73698	0.228143	7.87203	0.00502054	0.0165822
CAPRIN1	9.01272	8.9456	8.93052	8.2308	8.18507	8.27228	-0.735464	8.63935	120.95	3.91867e-28	2.19803e-26
CFAP45	2.03111	1.94797	2.04364	1.35457	1.53354	1.58045	-0.735364	1.30755	20.4997	5.96416e-06	4.23698e-05
DDX5	9.6898	9.71569	9.69818	8.97151	8.94786	8.98219	-0.73515	9.37842	135.19	2.9998e-31	1.98464e-29
KRTCAP3	1.31636	1.62798	1.09625	0.873654	1.06938	0.927835	-0.735106	0.393672	7.75892	0.0053448	0.0174654
ZNF503	3.72998	3.54093	3.48741	2.85376	2.91909	3.02027	-0.734104	3.15349	40.8067	1.68054e-10	2.40096e-09
GABARAPL1	5.55014	5.6655	5.51993	4.88327	4.90826	4.80699	-0.732989	5.23138	102.759	3.78483e-24	1.74386e-22
SLC39A11	5.01336	5.33656	5.01145	4.43963	4.33409	4.49007	-0.732847	4.76978	46.8791	7.5504e-12	1.2733e-10
SSH1	7.72388	7.52842	7.77315	6.93619	6.96574	6.95073	-0.732666	7.35214	85.5471	2.26253e-20	7.91028e-19
PLEKHG1	2.51365	3.2106	2.55324	2.32204	2.08429	2.17953	-0.727102	2.27129	9.66078	0.00188243	0.00715324
MORF4L1	8.412	8.21712	8.35312	7.656	7.57112	7.58831	-0.727006	8.00737	92.8636	5.60269e-22	2.1837e-20
CEP97	4.72334	4.65325	4.75285	3.93135	4.07436	4.05598	-0.723918	4.34155	84.6013	3.65016e-20	1.24909e-18
SELL	1.04582	2.38075	1.13153	1.12521	1.34366	1.13381	-0.722701	0.836286	1.95748	0.161783	0.276116
SETD7	7.88556	7.69816	7.90659	7.12256	7.11354	7.11939	-0.718658	7.51221	90.376	1.96942e-21	7.32203e-20
CHAC1	3.48795	3.56371	3.59243	2.77672	3.04924	2.88685	-0.717708	3.11507	41.6199	1.10857e-10	1.62889e-09
PSMD5-AS1	3.08832	3.39249	3.09911	2.47618	2.64914	2.61413	-0.715976	2.73293	26.8853	2.15893e-07	1.98945e-06
GINS1	5.73811	5.61887	5.67668	5.01249	4.87894	5.0448	-0.715891	5.33841	93.4717	4.12057e-22	1.62567e-20
SLC30A7	5.18149	5.28363	5.2418	4.61899	4.44193	4.56963	-0.714857	4.88681	90.6963	1.67509e-21	6.24576e-20
SLC22A31	0.846721	1.342	0.925849	0.645069	0.800335	0.734259	-0.713813	-0.117369	5.79052	0.0161128	0.0436428
PRR15L	0.590395	1.38649	0.777829	0.620085	0.681845	0.663498	-0.713729	-0.295202	3.17395	0.0748212	0.15151
PTK7	6.52927	6.599	6.68012	5.86993	5.91458	5.91839	-0.712409	6.2777	114.302	1.11885e-26	5.8676e-25
ABCG2	3.35543	3.49426	3.38148	2.91153	2.58455	2.83413	-0.711365	2.96792	32.7559	1.04487e-08	1.19347e-07
RARRES1	1.02711	1.31156	1.13153	0.955827	0.7541	0.711056	-0.711055	0.0716781	8.28377	0.0040001	0.0137066
MSTO2P	1.60845	1.93804	1.62794	1.30839	1.23002	1.28289	-0.710633	0.946894	12.9238	0.000324435	0.00153598
TREML3P	1.86186	1.93804	1.96758	1.4986	1.26341	1.5283	-0.710379	1.20517	17.2475	3.28131e-05	0.000198743
LSM11	3.24637	3.47722	3.22287	2.65286	2.60423	2.82875	-0.709897	2.86788	29.8767	4.60401e-08	4.76696e-07
PURB	6.3313	6.2635	6.43078	5.59896	5.63893	5.6949	-0.70988	6.01529	99.6357	1.83173e-23	8.12066e-22
PSMB8-AS1	1.30086	1.96763	1.41537	1.27677	1.17843	1.00618	-0.708651	0.747293	5.92867	0.0148965	0.0409503
RBM11	1.65796	1.68847	1.45769	1.03357	1.27982	1.18523	-0.707617	0.766445	12.617	0.000382255	0.00178031
IFI35	2.72003	2.78145	2.68376	2.22596	2.05598	2.17105	-0.706772	2.20067	31.2727	2.24205e-08	2.44917e-07
SDR42E1	4.15971	4.05899	4.07034	3.43649	3.35827	3.53152	-0.704748	3.70695	60.8861	6.04752e-15	1.34516e-13
AGGF1	5.53283	5.51916	5.55608	4.85277	4.81844	4.88293	-0.703718	5.19768	125.845	3.32493e-29	1.99511e-27
ZC2HC1C	1.4767	1.48526	1.72353	1.21137	1.10665	1.09848	-0.703455	0.712394	12.5354	0.000399323	0.00185178
GADD45G	1.81897	2.45922	1.7578	1.57859	1.76099	1.26706	-0.702302	1.37142	5.59504	0.0180114	0.0477724
LCLAT1	5.01573	4.79478	5.08977	4.2265	4.32621	4.34311	-0.700974	4.62063	54.0058	1.99902e-13	3.86648e-12
SERTAD2	6.75044	6.54442	6.74918	5.95231	6.03245	5.99123	-0.700915	6.36322	83.3132	7.00299e-20	2.34056e-18
NIPAL2	2.78275	2.94904	2.87805	2.32204	2.356	2.18796	-0.699203	2.36822	30.4425	3.43914e-08	3.64872e-07
BMP2K	4.51243	4.2517	4.48437	3.78167	3.81762	3.68826	-0.69866	4.0496	48.8092	2.82111e-12	4.97201e-11
NFYA	5.3771	5.23377	5.30979	4.66552	4.62166	4.60782	-0.698605	4.96656	98.5938	3.09988e-23	1.342e-21
CBR1	6.43789	6.46711	6.38856	5.76983	5.75132	5.70888	-0.698351	6.10871	127.205	1.67574e-29	1.02458e-27
CHTF18	6.15178	6.39136	6.27334	5.49801	5.64052	5.63221	-0.695256	5.95204	69.7414	6.76135e-17	1.78381e-15
SLC43A1	1.11836	1.21617	1.14886	0.915325	0.681845	0.84499	-0.694735	0.0776666	9.15189	0.00248462	0.00908631
ANKEF1	3.86258	3.95942	3.90433	3.28975	3.24164	3.2867	-0.694322	3.51171	63.076	1.98887e-15	4.58185e-14
NPTN-IT1	0.803377	1.21617	0.755386	0.312241	0.867023	0.711056	-0.693683	-0.326826	3.00858	0.0828248	0.163783
CHIC1	2.59215	2.61068	2.5854	2.29862	2.0936	1.6674	-0.693125	2.04978	12.2816	0.000457447	0.00208604
ROM1	1.82981	1.87698	1.45769	1.19454	1.27982	1.37435	-0.692945	0.953652	10.4458	0.00122931	0.00494523
TMEM33	6.13166	6.11991	6.21903	5.45891	5.51877	5.45412	-0.69242	5.83371	112.324	3.0343e-26	1.56582e-24
C7orf60	2.64221	2.71903	2.73627	2.23422	2.05598	2.11911	-0.691121	2.17253	29.2762	6.27613e-08	6.35046e-07
SAMD8	4.9809	5.06381	4.93113	4.32834	4.34193	4.31837	-0.690936	4.64597	93.6784	3.71197e-22	1.47348e-20
FAM111B	5.38997	5.52994	5.42269	4.83116	4.6831	4.82061	-0.688753	5.11423	82.2192	1.21804e-19	4.02921e-18
ZDHHC5	6.75115	6.69094	6.75661	6.07746	6.04151	6.04267	-0.687447	6.41746	132.371	1.24106e-30	8.0457e-29
PABPC4	7.61783	7.43553	7.60193	6.86918	6.85988	6.88842	-0.686179	7.2443	90.8307	1.56507e-21	5.86948e-20
ANKRD29	2.191	2.50702	2.05287	1.81711	1.65174	1.77201	-0.685786	1.6498	13.2355	0.000274692	0.00132177
ZNF236	3.41783	3.50775	3.62374	2.97694	2.89266	2.85545	-0.683884	3.09544	40.1364	2.36834e-10	3.31064e-09
LOC101928710	2.29637	2.67786	2.4169	1.89207	2.10285	1.80526	-0.683552	1.90637	14.7977	0.00011968	0.000632005
DPY30	5.80556	5.75306	5.72006	5.14319	5.09257	5.04132	-0.683046	5.43369	106.47	5.81573e-25	2.78917e-23
SLC7A7	1.08255	1.23251	1.06009	0.873654	0.845134	0.663498	-0.682249	0.0221168	8.25355	0.00406724	0.0138813
TRIQK	3.92205	4.21105	3.92961	3.46132	3.30715	3.42146	-0.681274	3.64213	35.3355	2.77534e-09	3.41974e-08
SAP30L	4.78731	4.69807	4.65622	4.06463	4.05064	4.08335	-0.681198	4.36233	81.8366	1.47816e-19	4.86474e-18
BIRC3	7.62271	7.51804	7.6039	6.93112	6.85305	6.93204	-0.68087	7.27464	107.31	3.80688e-25	1.8674e-23
FAM220A	4.54569	4.41811	4.57846	3.93642	3.77773	3.898	-0.680558	4.15554	61.1563	5.27181e-15	1.17464e-13
DPP3	7.14784	7.23114	7.22292	6.48671	6.51166	6.58046	-0.68014	6.89167	114.672	9.28539e-27	4.88942e-25
CP	0.615673	1.52561	0.90561	0.763884	0.730415	0.757096	-0.679571	-0.0830889	2.73489	0.0981781	0.187366
RARRES2	2.20772	2.43118	2.2821	1.90247	1.81828	1.6553	-0.679487	1.71019	18.534	1.66897e-05	0.000107603
ID1	6.93183	7.15066	6.8018	6.28393	6.27789	6.32745	-0.678952	6.65809	54.1905	1.81961e-13	3.53004e-12
OTUD4	6.72199	6.35264	6.69788	5.94729	5.91326	5.93413	-0.677626	6.28721	44.2059	2.9559e-11	4.63354e-10
LOC100507002	2.13091	2.30551	2.09816	1.70277	1.63908	1.70312	-0.677417	1.55041	19.5083	1.00164e-05	6.79041e-05
LOC103344931	1.79704	2.06209	1.76905	1.36963	1.37455	1.51497	-0.677067	1.16298	13.446	0.000245535	0.00119878
ZNF682	1.81897	1.97736	1.84541	1.33934	1.50591	1.41799	-0.676288	1.16324	16.2501	5.55062e-05	0.000318543
DDX3X	8.55596	8.34075	8.56936	7.81719	7.78634	7.8548	-0.675083	8.19031	69.1003	9.35809e-17	2.43405e-15
ELOVL4	2.35758	2.20971	2.17626	1.7496	1.6004	1.86955	-0.674974	1.63744	18.0727	2.12633e-05	0.000134272
PLOD2	8.10935	7.95716	8.09138	7.40308	7.35072	7.3946	-0.674433	7.75102	92.9103	5.47179e-22	2.13914e-20
SNORD44	0.988924	1.44376	0.90561	0.717526	0.930764	0.757096	-0.674421	0.0347292	4.97242	0.0257546	0.0639576
STBD1	1.54408	1.53881	1.53877	1.14285	1.32796	0.907565	-0.673159	0.685168	10.1646	0.0014316	0.00563943
RAVER2	4.25529	4.13485	4.30283	3.61464	3.57988	3.61827	-0.672991	3.86215	60.597	7.00415e-15	1.53936e-13
DYNC1LI2	6.74436	6.76477	6.69604	6.04791	6.12733	6.03451	-0.672924	6.42521	116.653	3.41925e-27	1.85256e-25
CHPT1	4.43644	4.40194	4.50469	3.84773	3.80916	3.78588	-0.672469	4.08838	74.916	4.91167e-18	1.42715e-16
ADH5	6.94871	6.89303	6.97417	6.38981	6.18728	6.23643	-0.672149	6.63083	85.579	2.22631e-20	7.80479e-19
APPBP2	5.58895	5.68122	5.61648	5.06897	4.89501	4.95753	-0.670743	5.30543	85.1382	2.78216e-20	9.6227e-19
TSKU	8.0381	8.08429	8.05394	7.35397	7.41016	7.40932	-0.670712	7.75717	115.884	5.04019e-27	2.69807e-25
RNF6	6.45068	6.2852	6.35677	5.76129	5.63335	5.72055	-0.669941	6.05309	84.8762	3.17651e-20	1.0928e-18
PWAR5	2.45183	2.12472	2.43113	1.6043	1.95741	1.91086	-0.669464	1.75475	12.8786	0.000332364	0.00156834
RAB11B-AS1	0.758691	1.24867	0.984914	0.717526	0.7541	0.663498	-0.668756	-0.181473	5.44432	0.0196321	0.0512077
VEGFA	5.34155	5.44659	5.34592	4.70764	4.76553	4.72394	-0.66652	5.05131	96.7697	7.78783e-23	3.22022e-21
NF2	6.21051	5.91306	6.2689	5.41782	5.49612	5.53728	-0.666358	5.82492	43.6307	3.9657e-11	6.10519e-10
ASCL5	1.00814	1.06012	1.16597	0.763884	0.730415	0.801712	-0.666193	-0.0560468	8.02437	0.00461521	0.0154491
FAM110C	3.0331	3.21883	2.71898	2.46219	2.446	2.41313	-0.665625	2.5325	16.9118	3.91569e-05	0.000233764
FAM63B	3.36664	3.54748	3.46338	2.71906	2.88731	2.99167	-0.665127	3.0395	31.7747	1.73132e-08	1.92061e-07
FAM169A	4.55225	4.41989	4.68174	3.96646	3.88621	3.92346	-0.664777	4.20281	51.5229	7.07682e-13	1.30054e-11
IGIP	1.18742	1.09628	1.09625	0.763884	0.930764	0.711056	-0.664753	0.0285447	8.15453	0.00429537	0.0145369
ABCA1	4.7887	4.78927	4.91476	4.18025	4.24913	4.16886	-0.661555	4.49131	75.6011	3.47176e-18	1.02025e-16
USP12	6.50833	6.13791	6.4705	5.70523	5.68201	5.80036	-0.661412	6.07234	39.968	2.5816e-10	3.5928e-09
ZNF767P	2.04977	2.85718	2.16779	1.77245	1.98769	1.91086	-0.661125	1.83229	6.06548	0.0137849	0.038402
CAV2	6.74365	6.52423	6.69678	6.04556	6.04211	5.92596	-0.660613	6.35183	69.8567	6.37721e-17	1.68591e-15
TMEM143	2.35758	2.79251	2.50697	2.01216	2.0936	2.00926	-0.659749	2.02444	15.4542	8.453e-05	0.00046287
TRIP13	7.67775	7.38662	7.59997	6.92188	6.89992	6.89262	-0.659493	7.26047	60.6078	6.96558e-15	1.5335e-13
CYP4F11	6.29558	6.38498	6.37022	5.69704	5.77249	5.63452	-0.658622	6.04233	94.7226	2.19026e-22	8.80264e-21
SNORD31	1.04582	1.68847	1.00408	0.830743	0.800335	1.13381	-0.658449	0.291994	3.54814	0.0596124	0.126282
PPIF	8.9111	8.63024	8.84193	8.15741	8.16284	8.10977	-0.657625	8.50463	58.6436	1.88983e-14	4.02987e-13
UBIAD1	4.51243	4.34296	4.52307	3.89014	3.82323	3.81065	-0.657186	4.1083	57.6046	3.20476e-14	6.66849e-13
NOL4L	4.08702	4.37459	4.18393	3.54997	3.69449	3.57394	-0.656721	3.85531	38.7246	4.88031e-10	6.59967e-09
HDAC5	5.1418	5.42631	5.29334	4.62685	4.66759	4.67681	-0.655566	4.96648	56.9035	4.57736e-14	9.38832e-13
LYSMD3	5.18466	5.25292	5.16193	4.57091	4.55074	4.58087	-0.655039	4.87289	98.539	3.1868e-23	1.37043e-21
P4HA1	5.01929	5.26786	5.15659	4.46616	4.50436	4.58726	-0.654316	4.82304	58.4681	2.06609e-14	4.36961e-13
SUZ12	5.89474	5.76786	5.87447	5.30282	5.17165	5.14343	-0.653323	5.53336	76.5188	2.18126e-18	6.49895e-17
TPBG	5.28949	5.68938	5.26681	4.78835	4.73461	4.85938	-0.652557	5.10764	28.87	7.74033e-08	7.69915e-07
ADRM1	8.14641	8.16006	8.16107	7.45897	7.57735	7.48223	-0.65167	7.86184	98.563	3.14848e-23	1.35848e-21
C1S	4.86578	5.37387	5.0067	4.59034	4.38807	4.42917	-0.65017	4.7701	22.3731	2.24493e-06	1.72392e-05
LINC00942	2.62986	2.50029	2.53359	2.00253	2.05598	2.05605	-0.650119	2.01819	25.3527	4.77492e-07	4.17919e-06
RSPO3	1.87238	1.38649	1.824	1.42838	1.27982	1.15116	-0.650118	0.937202	7.53771	0.00604208	0.0194629
TYW1	5.728	5.47348	5.63042	4.97234	4.97529	4.99524	-0.649987	5.29817	64.3077	1.06427e-15	2.53324e-14
MEMO1	5.58255	5.40214	5.55202	4.89634	4.77713	4.96736	-0.64952	5.19628	62.3167	2.92439e-15	6.66564e-14
PRKAB1	4.84589	4.99604	4.83407	4.27932	4.1699	4.36558	-0.646919	4.5607	56.8558	4.68977e-14	9.58839e-13
ANKRD28	6.7103	6.47142	6.74989	6.01833	6.01785	5.99483	-0.646716	6.34822	59.3395	1.32687e-14	2.85299e-13
LOC344887	4.04111	4.65931	4.01946	3.5859	3.65414	3.75501	-0.646519	3.91352	12.0411	0.00052041	0.00233524
FAM217B	5.45005	5.54964	5.35993	4.87274	4.72715	4.87903	-0.645484	5.13754	64.3582	1.03736e-15	2.47376e-14
ASS1	5.45531	6.38863	5.45526	5.22314	5.19995	5.19661	-0.644874	5.52716	5.64217	0.0175335	0.0467946
KDM6A	5.11213	4.93369	5.07512	4.35887	4.46364	4.44156	-0.644707	4.71455	67.5063	2.10019e-16	5.2919e-15
RSRP1	2.47963	3.55399	2.66582	2.18396	2.63645	2.44864	-0.644412	2.51248	3.83293	0.0502552	0.109982
GABRE	1.5175	1.96763	1.24864	1.228	1.14299	1.25106	-0.644133	0.796093	5.35146	0.020705	0.053455
SESN1	2.05902	2.51373	1.83474	1.64202	1.81828	1.60583	-0.642248	1.54199	7.17967	0.00737343	0.0229659
PTAR1	5.03225	5.07971	5.1274	4.32061	4.50785	4.54851	-0.641581	4.75484	61.7086	3.98239e-15	8.95066e-14
TAOK1	7.20907	6.85065	7.3044	6.48239	6.52978	6.48708	-0.640027	6.83987	31.7945	1.7138e-08	1.90436e-07
PTPN21	4.71752	4.58011	4.69507	4.0413	4.12292	4.00443	-0.639919	4.32704	64.1072	1.17831e-15	2.77905e-14
AMT	0.825212	1.41541	0.777829	0.669628	0.845134	0.711056	-0.638377	-0.124257	3.35329	0.0670708	0.1386
DCP1A	5.01573	4.85275	4.95471	4.3513	4.31032	4.33175	-0.637045	4.61479	72.6712	1.53153e-17	4.26745e-16
PHF1	5.37986	5.50997	5.46912	4.86345	4.73312	4.90354	-0.636685	5.13966	70.6727	4.21678e-17	1.13099e-15
USP31	4.87497	4.39832	4.87107	4.0876	4.14772	4.13874	-0.63622	4.39685	22.4532	2.15329e-06	1.65947e-05
SLC1A5	8.52315	8.7079	8.4879	7.87938	7.98426	7.96326	-0.635337	8.28978	61.349	4.78042e-15	1.06884e-13
TXNRD1	12.312	12.3387	12.3203	11.7401	11.6509	11.6741	-0.635005	12.0406	92.341	7.29581e-22	2.80965e-20
SLC24A1	2.38724	2.52704	2.30546	1.99283	1.94717	1.80526	-0.634966	1.84863	18.4389	1.75438e-05	0.000112659
CELF1	7.13014	6.99742	7.09917	6.43214	6.45723	6.45426	-0.634633	6.78405	98.7055	2.92984e-23	1.27266e-21
MYO7A	2.43062	2.9784	2.61687	2.02173	2.31677	2.17953	-0.633886	2.18705	10.5963	0.00113312	0.00459265
ATAT1	3.00946	3.60509	3.16018	2.57048	2.90329	2.6873	-0.633663	2.85364	10.8622	0.000981444	0.00405172
HECW1	3.05637	2.85718	2.79796	2.29072	2.34043	2.49012	-0.633347	2.43492	21.0671	4.43466e-06	3.23595e-05
USP10	6.5421	6.40314	6.56426	5.89292	5.86717	5.88119	-0.633117	6.20801	85.6642	2.13235e-20	7.49577e-19
ABHD3	5.25572	5.21744	5.22556	4.55452	4.63129	4.67831	-0.631519	4.91551	88.1884	5.95079e-21	2.16868e-19
GLA	6.9614	6.72635	6.97234	6.28045	6.22219	6.29612	-0.631064	6.59846	60.3958	7.75768e-15	1.69918e-13
CDH7	3.0331	2.83594	3.108	2.4692	2.4748	2.44161	-0.630454	2.53701	24.2796	8.33155e-07	6.97957e-06
SIRT5	3.82786	3.82039	3.96915	3.23731	3.42619	3.2184	-0.6303	3.49879	36.9937	1.1851e-09	1.5289e-08
FBXL8	0.888801	1.42965	1.114	0.830743	0.706334	0.986989	-0.629433	0.1017	4.61157	0.0317569	0.0755261
ZNRF2	5.0875	4.91988	5.07965	4.44319	4.36133	4.47121	-0.628673	4.70914	63.7518	1.41123e-15	3.30422e-14
SLC44A1	7.95977	7.98032	7.9965	7.36388	7.30008	7.39483	-0.628552	7.69332	98.0682	4.04226e-23	1.70981e-21
ANKRD37	1.22075	1.14889	1.114	0.763884	1.01159	0.757096	-0.627264	0.102283	7.29066	0.00693141	0.0217466
WFDC2	3.3251	4.38194	3.45991	3.25365	3.22478	3.22251	-0.624065	3.42533	4.48681	0.0341574	0.08015
GCLM	8.57753	8.51441	8.63191	7.98955	7.94621	7.92438	-0.623819	8.29346	86.1151	1.69762e-20	6.05001e-19
ZC3HAV1L	2.6174	2.93413	2.95884	2.42661	2.2009	2.33939	-0.623806	2.36659	16.3769	5.19154e-05	0.000300881
FAM104A	6.14203	6.1111	6.1438	5.50228	5.53167	5.52486	-0.623788	5.83477	107.602	3.28522e-25	1.6364e-23
ADAT1	4.90987	4.70394	4.89051	4.23063	4.18958	4.301	-0.623306	4.51185	53.4584	2.64123e-13	5.04808e-12
CCND3	7.02144	6.99174	7.07219	6.4384	6.38512	6.41082	-0.623141	6.74038	107.551	3.37144e-25	1.67288e-23
TRPV3	2.17409	2.3734	2.25035	1.79495	1.78418	1.81618	-0.622404	1.68036	18.4344	1.75853e-05	0.00011287
ZNF697	2.84819	2.93912	2.88323	2.22596	2.43871	2.43454	-0.621959	2.41954	24.6077	7.02686e-07	5.96405e-06
BNIP3L	5.84684	6.10279	5.77548	5.3358	5.27042	5.31388	-0.621119	5.61563	43.1366	5.10475e-11	7.76608e-10
GBP3	6.03836	6.07587	6.07694	5.48076	5.38389	5.50391	-0.61803	5.76751	89.4129	3.20448e-21	1.18117e-19
MTHFD2	7.75123	7.60121	7.73208	7.13005	7.04439	7.0718	-0.617523	7.41393	77.4962	1.32979e-18	4.0467e-17
DGKA	4.38408	4.74724	4.36715	5.10543	5.15284	5.00481	0.600113	4.77922	27.8151	1.33478e-07	1.27556e-06
KMT2C	5.33396	5.07178	5.56417	5.88639	5.9296	5.95896	0.600209	5.63357	25.6919	4.00511e-07	3.54632e-06
SMYD5	5.70463	5.68196	5.70404	6.31394	6.25265	6.2966	0.600557	6.00118	99.2822	2.18965e-23	9.6084e-22
RHOBTB1	3.20533	3.39974	3.30242	3.87174	3.82602	3.86685	0.600777	3.48852	41.5573	1.14464e-10	1.67426e-09
PANX1	6.50622	6.37719	6.47609	7.06095	7.01191	7.07464	0.600839	6.76974	87.4525	8.63294e-21	3.11099e-19
SSBP2	3.8573	3.98376	3.85505	4.49393	4.39938	4.50701	0.600945	4.13542	53.9884	2.01679e-13	3.89501e-12
CYP1A2	1.20418	1.18292	1.26462	1.64202	1.63908	1.48792	0.600985	0.782774	10.8562	0.000984677	0.00406116
DNMT3B	4.97724	5.01623	5.09871	5.65615	5.60677	5.59149	0.601821	5.32061	81.236	2.00305e-19	6.54212e-18
TAGLN	5.97201	4.94116	6.12259	6.32025	6.38227	6.37482	0.603195	6.07235	3.92876	0.0474669	0.104822
SH3TC2	2.55343	2.4799	2.49348	2.92179	3.09632	3.04831	0.603595	2.57583	26.745	2.32149e-07	2.1271e-06
CYP27C1	1.92388	1.49884	1.78021	2.10512	2.25171	2.22118	0.603906	1.5915	11.4848	0.000701673	0.00302032
NKX2-8	2.24059	2.61068	2.00611	2.70725	2.64914	3.03902	0.604758	2.33082	8.0972	0.00443338	0.0149295
CCDC88C	4.85521	4.65022	4.93737	5.27508	5.50836	5.42679	0.60486	5.10308	37.871	7.55807e-10	1.00109e-08
UNC5B	0.867914	0.984946	1.04166	1.16029	1.19583	1.50151	0.605363	0.329235	6.65597	0.00988239	0.0292213
KL	0.735817	0.755412	0.777829	1.10734	1.01159	0.986989	0.605856	-0.116605	6.53883	0.0105545	0.0309111
WNT7A	1.62099	1.55189	1.78021	1.86042	2.2009	2.19633	0.605872	1.4643	10.7348	0.00105141	0.00429655
PLXNA4	0.949705	0.984946	0.454709	1.01452	1.19583	1.11626	0.606467	0.0166444	3.95858	0.046633	0.103317
KLF4	4.72479	4.36906	4.62407	5.11441	5.16945	5.21219	0.606471	4.85585	38.0247	6.98561e-10	9.28129e-09
DSP	7.79718	7.53234	7.85723	8.26633	8.38153	8.37378	0.608144	8.06502	40.6299	1.83972e-10	2.60816e-09
TMC5	4.37115	4.44465	4.55103	5.09073	5.04055	4.99644	0.608193	4.72883	64.576	9.28817e-16	2.23141e-14
SH2B2	0.758691	1.07831	0.612867	1.17752	1.27982	0.907565	0.608503	0.0482727	4.14409	0.0417802	0.0941824
DSTYK	4.57337	4.45339	4.70242	5.18425	5.12472	5.19452	0.609105	4.85717	56.3844	5.96006e-14	1.2033e-12
FAM105A	3.74437	3.75402	3.88378	4.45913	4.25329	4.38587	0.609431	4.02857	43.7859	3.66335e-11	5.68039e-10
CHRM4	0.825212	0.661978	0.661954	0.975659	0.822909	1.15116	0.610652	-0.203055	5.34818	0.0207439	0.0535341
EMP1	5.66961	5.76856	5.6281	6.3571	6.28958	6.22725	0.611956	6.00099	74.8498	5.07934e-18	1.46925e-16
TGIF2	4.52416	4.4997	4.53958	5.08161	5.13716	5.1183	0.613099	4.79834	90.935	1.4847e-21	5.60064e-20
DNAJC8	6.69222	6.56674	6.69309	7.32092	7.22049	7.23879	0.61382	6.97731	80.8877	2.38913e-19	7.68631e-18
SYTL1	4.63029	5.32613	4.74718	5.39591	5.58959	5.60336	0.614565	5.22812	10.8491	0.000988441	0.00407408
MAL2	8.20262	8.31292	8.1939	8.91349	8.81262	8.82322	0.614639	8.5727	74.6934	5.49794e-18	1.5762e-16
BEND7	2.63605	2.27428	2.55324	2.99649	3.10095	2.95757	0.614761	2.5663	19.2082	1.17209e-05	7.80245e-05
KIF13A	6.23723	5.86605	6.26244	6.73381	6.74268	6.74693	0.615358	6.45322	33.9488	5.65807e-09	6.72763e-08
NOTCH2	7.73564	7.10895	7.80064	8.1752	8.24166	8.16097	0.615363	7.91324	12.5649	0.000393069	0.00182672
SVEP1	2.91589	2.14212	3.08118	3.24551	3.31911	3.35565	0.615562	2.88802	5.77116	0.0162913	0.0440523
BTG1	5.83344	5.1779	5.74804	6.27695	6.14199	6.23846	0.616133	5.92644	14.0927	0.00017402	0.00088842
PLA2R1	0.758691	1.14889	0.799927	1.228	1.31209	1.1683	0.616861	0.229039	6.27291	0.0122598	0.0349378
NXPH4	3.48109	3.79035	3.34813	4.24908	4.11836	4.00204	0.618031	3.77034	20.8299	5.01934e-06	3.61353e-05
PNPLA3	1.59581	1.80232	1.67653	2.00253	2.33259	2.09242	0.6184	1.5285	12.5083	0.000405156	0.00187412
HOXC8	0.688953	0.799954	0.777829	0.955827	1.17843	0.986989	0.618931	-0.109437	6.41486	0.0113169	0.0326913
PARD6B	2.63605	3.08574	2.88323	3.41487	3.4445	3.42859	0.61905	3.02072	20.8183	5.04972e-06	3.62933e-05
ROR1	3.97184	3.63306	4.05435	4.49907	4.39374	4.55178	0.619624	4.14417	26.4154	2.75342e-07	2.50154e-06
AOX1	4.93268	4.54292	4.94978	5.39407	5.4158	5.45761	0.62037	5.11352	30.9803	2.60655e-08	2.8187e-07
DNER	2.8641	2.86768	2.9976	3.47183	3.4225	3.49463	0.620719	3.0574	38.5101	5.44719e-10	7.32787e-09
AMZ1	0.929688	0.732615	0.965493	1.05237	1.23002	1.29854	0.62115	0.161515	7.0421	0.00796154	0.0244494
MFN2	6.38328	6.20363	6.41922	6.96314	6.96447	6.93235	0.621206	6.66491	72.4385	1.72317e-17	4.79109e-16
RPS10P7	0.456902	0.90564	0.821692	0.740891	1.24681	1.04381	0.62126	-0.144527	3.28697	0.0698317	0.143318
PCDHGA6	0.888801	0.777855	1.00408	0.975659	1.32796	1.31402	0.621477	0.190083	6.22899	0.0125675	0.0357123
EGFR	8.45564	8.07469	8.53158	8.94268	9.03858	8.98128	0.622192	8.70755	27.7724	1.36461e-07	1.30213e-06
ZNF596	0.615673	0.945837	0.755386	1.01452	1.06938	1.13381	0.62357	-0.0552667	6.31918	0.0119439	0.0341962
ZEB1-AS1	0.846721	1.09628	0.799927	1.16029	1.50591	1.04381	0.623649	0.245818	5.19256	0.0226838	0.0576866
PRKG1	0.949705	1.342	1.21614	1.55242	1.58727	1.54152	0.624085	0.729308	9.23259	0.00237745	0.00875084
NOV	1.60845	1.68847	1.7578	2.2093	2.05598	2.16252	0.624263	1.52114	17.1693	3.41916e-05	0.000206124
RAET1E	3.00468	3.04468	2.74199	3.53334	3.41509	3.5282	0.624459	3.0887	27.4843	1.58373e-07	1.48811e-06
KANK1	3.52178	3.1645	3.66345	4.01518	4.04345	4.06973	0.62471	3.67916	21.7361	3.12849e-06	2.35214e-05
RNF144A-AS1	0.803377	1.07831	0.925849	1.30839	1.27982	1.23489	0.625019	0.288056	8.2815	0.0040051	0.0137201
FAM132B	1.36188	1.52561	1.32682	1.93322	1.82947	1.71483	0.625428	1.10626	12.5067	0.000405501	0.00187447
SOX13	3.44629	3.63306	3.57971	4.08987	4.19608	4.12345	0.625467	3.77839	48.0619	4.12971e-12	7.15132e-11
NAGA	4.65945	4.60856	4.6085	5.25999	5.22029	5.21425	0.626644	4.91536	95.8898	1.21463e-22	4.94318e-21
DAPK1	4.55061	4.15642	4.59593	5.00648	5.04656	5.10055	0.627826	4.73003	28.2663	1.05721e-07	1.02472e-06
HCN3	2.55343	3.27513	2.76464	3.41123	3.49808	3.45677	0.628466	3.04594	10.2309	0.00138111	0.00546386
LOC643072	0.735817	0.86429	0.799927	1.05237	1.08813	1.1683	0.628516	-0.00277799	7.45933	0.00631084	0.0201525
TCF4	2.45883	2.45226	2.57263	3.13961	2.96548	2.98201	0.628619	2.57449	27.1705	1.86276e-07	1.73262e-06
SCAMP5	2.50691	2.5918	2.75336	3.10851	3.20343	3.18089	0.628667	2.72433	28.3833	9.95226e-08	9.69013e-07
ADNP2	5.21908	5.22868	5.359	5.88114	5.8692	5.90758	0.628954	5.58237	85.1918	2.7078e-20	9.39067e-19
ATG2B	5.29928	5.14806	5.30401	5.85996	5.87462	5.87141	0.629851	5.56432	82.0713	1.31263e-19	4.33101e-18
RRAGB	1.84057	1.65248	1.64024	2.087	2.26	2.18796	0.629914	1.56356	16.3659	5.22166e-05	0.000302355
KIF26A	1.71755	1.82405	2.04364	2.22596	2.38663	2.43454	0.629995	1.77732	14.8994	0.000113401	0.000602549
B3GNT7	2.3273	3.18564	2.34357	3.19564	3.24999	3.23477	0.631322	2.79268	5.65109	0.0174445	0.0466139
FOXD3	0.615673	0.799954	0.709427	1.12521	0.909828	0.927835	0.631896	-0.210264	6.1349	0.0132539	0.0372248
NUTM2D	1.0643	1.00411	0.864261	1.2607	1.27982	1.43225	0.631901	0.369835	8.84751	0.00293488	0.0105263
NCR3LG1	3.83056	3.71094	3.94704	4.42708	4.41618	4.44508	0.633104	4.08282	53.1885	3.03022e-13	5.74896e-12
PCDHB8	1.88283	2.08026	2.18469	2.57048	2.54437	2.56321	0.633155	2.02661	20.329	6.52038e-06	4.58167e-05
SAMD4A	5.35756	5.07178	5.41824	5.90137	5.90997	5.91965	0.633227	5.60535	44.5448	2.48601e-11	3.94975e-10
C16orf87	2.38724	2.21794	2.19306	2.81575	2.7818	2.77941	0.634106	2.29937	25.9632	3.47982e-07	3.11758e-06
NPR1	1.84057	1.68847	1.85599	2.05939	2.29271	2.44864	0.634214	1.68223	13.2756	0.000268877	0.00129734
BCL11B	1.84057	1.81322	1.83474	2.29072	2.23497	2.40593	0.635019	1.72749	20.356	6.42912e-06	4.52247e-05
DUSP19	2.03111	1.56485	2.08021	2.41213	2.41662	2.37673	0.635072	1.83637	11.3518	0.000753729	0.00321982
C9orf91	2.9108	2.8466	2.86762	3.50292	3.4445	3.36683	0.635364	3.02494	39.9315	2.63024e-10	3.65261e-09
ANXA1	8.474	8.72352	8.49225	9.25957	9.14333	9.20038	0.63542	8.91655	53.0901	3.18588e-13	6.02654e-12
PCDHGB3	0.712576	0.90564	0.612867	0.873654	1.14299	1.09848	0.637096	-0.116498	5.88058	0.0153088	0.041907
XK	1.25333	1.02302	1.44372	1.45688	1.807	1.67941	0.638512	0.859353	7.72473	0.00544696	0.0177318
PRR18	0.758691	0.755412	0.885084	1.228	0.909828	1.1683	0.638717	0.00343887	6.68925	0.0096996	0.0287798
B3GNT3	4.2573	4.59914	4.21099	4.93484	5.05612	4.9464	0.638764	4.65192	32.1933	1.39569e-08	1.56708e-07
DCLK1	2.52703	2.68381	2.72477	3.19141	3.11474	3.29453	0.639233	2.76231	29.0833	6.93305e-08	6.96599e-07
BACH2	3.07926	2.77589	3.05385	3.57619	3.56991	3.49802	0.63934	3.14266	30.1052	4.09242e-08	4.28194e-07
ARRB1	4.34115	4.44465	4.3504	4.98462	4.97403	5.02259	0.639395	4.66598	85.7188	2.07429e-20	7.31158e-19
ST6GALNAC5	2.13091	2.01563	2.14207	2.61542	2.57793	2.63894	0.639516	2.08543	25.741	3.9045e-07	3.46437e-06
HBEGF	4.36371	3.39974	4.19856	4.61741	4.70605	4.63427	0.640207	4.31293	6.96537	0.00831023	0.0252438
PDLIM2	3.87048	3.81226	3.89922	4.49907	4.49385	4.40226	0.640412	4.11768	66.9974	2.71872e-16	6.81052e-15
LOXL1-AS1	2.66661	2.3734	2.20966	3.03481	2.94505	2.93271	0.641886	2.50162	17.224	3.32219e-05	0.000201124
MARCKSL1	6.25594	6.24902	6.218	6.89675	6.8936	6.83811	0.642146	6.57909	119.211	9.41583e-28	5.21346e-26
LINC00641	3.52845	3.58296	3.78476	4.1012	4.32027	4.28341	0.643863	3.87768	35.9436	2.03113e-09	2.55895e-08
CD44	7.89398	7.39708	7.84166	8.33751	8.36804	8.40201	0.644395	8.07878	25.7109	3.96571e-07	3.51384e-06
TMCC2	3.10626	2.88845	3.15161	3.62724	3.60289	3.67032	0.644432	3.23343	35.9703	2.0035e-09	2.52908e-08
TM4SF1	0.735817	0.821719	0.945807	1.19454	1.27982	0.986989	0.644644	0.0850641	7.12922	0.00758377	0.0234906
H2AFY2	4.69546	4.76279	4.70388	5.33388	5.34445	5.36309	0.645986	5.02619	103.497	2.60826e-24	1.2104e-22
DDX60L	5.01929	5.06837	5.13067	5.71706	5.66415	5.73212	0.646797	5.39095	96.1244	1.07888e-22	4.40464e-21
TMEM180	2.50014	2.75341	2.43819	2.98675	3.23744	3.14671	0.646829	2.67507	20.8913	4.86095e-06	3.51126e-05
INO80D	3.37776	3.34443	3.72538	4.11468	4.14772	4.01631	0.647686	3.72404	27.6942	1.42088e-07	1.34655e-06
PPP1R14C	4.98696	4.67285	4.89437	5.50399	5.46506	5.49205	0.647927	5.16854	53.362	2.77409e-13	5.28635e-12
TMEM65	4.62096	4.68031	4.63794	5.37553	5.27963	5.15852	0.648168	4.95023	68.6773	1.15968e-16	2.9922e-15
TEX15	2.67264	2.38075	2.89354	3.18291	3.22054	3.27883	0.648481	2.78713	17.7784	2.4819e-05	0.000155056
NATD1	1.30086	1.06012	1.31152	1.67878	1.40479	1.79426	0.648493	0.829972	8.80359	0.00300638	0.0107528
PAXBP1-AS1	0.825212	0.843162	0.864261	1.10734	1.27982	1.11626	0.648766	0.103071	8.35022	0.00385641	0.0132742
C18orf25	5.73955	5.79287	5.76358	6.39396	6.38748	6.43226	0.648834	6.10029	116.588	3.53367e-27	1.8995e-25
IRGQ	4.38408	4.57532	4.33156	4.99073	5.07505	5.11278	0.650583	4.73008	57.208	3.92074e-14	8.10601e-13
CRIM1	7.48461	6.99353	7.51777	7.99518	8.00862	7.99227	0.650858	7.70433	23.3336	1.362e-06	1.09751e-05
SLC6A8	2.4658	2.40258	2.5854	2.98186	3.12839	3.0108	0.651159	2.5771	29.2375	6.40285e-08	6.46853e-07
GLI3	2.47963	2.55978	2.74769	3.15274	3.14192	3.19351	0.651633	2.71343	29.8282	4.72077e-08	4.88393e-07
NIPAL3	6.11015	5.9048	6.08821	6.72468	6.62598	6.69281	0.652492	6.37875	74.7034	5.4701e-18	1.57171e-16
PDCD4	4.18315	4.4429	4.08392	4.96243	4.86541	4.77658	0.653254	4.53277	36.3808	1.6229e-09	2.06684e-08
STAT4	1.67008	1.78025	1.938	2.3451	2.30078	2.23752	0.653315	1.69839	18.8766	1.39452e-05	9.14161e-05
MOXD1	2.18257	1.93804	2.14207	2.55738	2.7818	2.49692	0.653869	2.08618	17.8626	2.37441e-05	0.000148773
RASGRF2	1.1533	1.02302	1.4988	1.67878	1.63908	1.64309	0.656129	0.851965	9.00211	0.00269668	0.00975954
ARHGDIB	4.26531	4.13267	4.27746	4.86611	4.92792	4.76536	0.656229	4.51551	64.7994	8.29254e-16	2.00691e-14
CYP2E1	1.11836	1.21617	1.23248	1.7496	1.58727	1.43225	0.65623	0.76773	10.8976	0.000962889	0.00398787
TRHDE-AS1	0.590395	0.885113	0.685886	0.915325	1.03111	1.11626	0.656545	-0.159107	6.47724	0.0109264	0.0317983
CREG2	2.37249	2.55978	2.22608	2.96211	2.87656	2.99647	0.657401	2.46678	23.1544	1.49504e-06	1.19724e-05
PBX1	3.11958	3.17299	2.99281	3.69161	3.72477	3.65824	0.657439	3.2908	46.0181	1.17168e-11	1.93544e-10
TMEM170A	3.95955	3.96432	3.86294	4.53961	4.56253	4.5583	0.658844	4.20218	77.9016	1.08306e-18	3.34272e-17
SLCO3A1	4.89833	5.08309	4.92611	5.59975	5.66727	5.57231	0.658961	5.29329	76.6215	2.07074e-18	6.18395e-17
SCARA3	4.26131	3.92966	4.32777	4.72532	4.92792	4.77798	0.659083	4.4713	31.2659	2.24999e-08	2.45577e-07
TMEM109	5.57693	5.49057	5.56256	6.26088	6.16757	6.14523	0.659625	5.88089	96.4925	8.95835e-23	3.68063e-21
SBK1	2.41631	2.85718	2.39529	3.15274	3.09632	3.17242	0.659983	2.68563	17.1068	3.5335e-05	0.000212521
LOC100129034	6.00706	6.1243	6.04434	6.67437	6.74859	6.71448	0.661315	6.40662	107.178	4.06979e-25	1.98129e-23
CDKN1C	3.21777	3.56694	2.92907	3.94147	3.8148	3.84303	0.662187	3.47777	16.0046	6.31897e-05	0.000357079
TNNC1	1.9035	1.88734	1.89758	2.32977	2.48898	2.40593	0.663068	1.83469	23.8237	1.05574e-06	8.64768e-06
C6orf120	3.01896	3.55724	3.09465	3.89014	3.85369	3.80518	0.663175	3.45871	18.4248	1.76739e-05	0.000113382
DAPP1	4.63029	4.87244	4.7585	5.44742	5.36286	5.39165	0.663672	5.07447	68.9472	1.01135e-16	2.62524e-15
LOC79160	1.44884	1.18292	1.29605	1.78375	1.81828	1.63078	0.663681	0.978472	12.8086	0.000345031	0.00162099
DZIP1	1.00814	0.86429	1.02299	1.42838	0.971745	1.5283	0.663953	0.364379	5.95807	0.01465	0.0403935
TM7SF3	6.09618	6.09275	6.16258	6.79369	6.73675	6.79047	0.664025	6.46723	120.104	6.00283e-28	3.33804e-26
ADRB2	2.82128	2.30551	2.75336	3.39291	3.09632	3.15533	0.664099	2.77306	14.137	0.000169967	0.000869792
ULBP3	1.26935	1.48526	1.28042	1.82806	1.8516	1.67941	0.66433	1.03599	13.6446	0.000220879	0.00109479
SLC46A3	2.99026	3.28691	3.03068	3.77885	3.60615	3.74076	0.664791	3.3085	31.4822	2.01275e-08	2.20992e-07
ABCA12	0.846721	1.342	0.945807	1.41392	1.50591	1.41799	0.664968	0.543337	7.28663	0.00694695	0.0217795
ITPR2	3.43213	2.95397	3.42123	3.77603	3.94141	3.96574	0.666839	3.50722	20.1219	7.26583e-06	5.06958e-05
ADAMTS14	1.67008	1.92804	1.98698	2.40483	2.33259	2.40593	0.667116	1.79959	19.1013	1.23958e-05	8.20513e-05
ABL2	6.27341	5.91052	6.33187	6.86021	6.83477	6.8371	0.667817	6.53654	38.2907	6.09511e-10	8.15695e-09
NLGN4X	0.909389	0.821719	1.14886	1.42838	1.40479	1.15116	0.668514	0.365232	7.83399	0.00512729	0.0168657
LIMA1	5.70684	5.76505	5.63657	6.3824	6.3127	6.39134	0.669122	6.04983	101.816	6.09246e-24	2.75785e-22
MAP1B	8.93616	8.60594	9.04141	9.50619	9.55634	9.5616	0.669933	9.24333	36.2599	1.72679e-09	2.19049e-08
TRIM7	3.67091	3.74835	3.65135	4.32448	4.35554	4.2775	0.670546	3.9529	70.483	4.64259e-17	1.23748e-15
ADCY6	3.05637	3.52111	3.12997	3.78448	3.97455	3.82693	0.670769	3.47076	21.5367	3.4712e-06	2.58556e-05
APOLD1	3.52845	3.19401	3.38514	4.01279	4.03381	3.93602	0.671641	3.60962	37.9565	7.23391e-10	9.6013e-09
SYT16	2.28065	1.99662	2.29771	2.64669	2.77603	2.81793	0.672414	2.23388	21.3279	3.87049e-06	2.85271e-05
C4BPB	3.85199	3.38154	3.876	4.3475	4.37094	4.33744	0.672866	3.98617	24.2552	8.43771e-07	7.05476e-06
KIAA1549L	4.95018	4.49801	5.13067	5.45979	5.55461	5.59704	0.673222	5.21096	19.262	1.13952e-05	7.60922e-05
KIFAP3	4.49039	4.49801	4.44634	5.18105	5.05968	5.14127	0.674217	4.79075	94.8996	2.00287e-22	8.0747e-21
TMEM41A	4.691	4.85539	4.92234	5.45096	5.41487	5.57552	0.675088	5.15297	63.247	1.82345e-15	4.20828e-14
MIR600HG	2.01219	1.53881	2.25836	2.41213	2.62365	2.44864	0.675834	1.93593	8.67523	0.00322563	0.0114074
CLMN	3.84399	4.21311	3.85768	4.60791	4.6535	4.61096	0.676694	4.26889	36.4773	1.54453e-09	1.97287e-08
GCSHP3	0.969448	0.843162	0.90561	1.41392	1.19583	1.1683	0.677094	0.250742	9.19426	0.00242775	0.00891304
NBEAL1	3.91952	3.863	3.96915	4.45913	4.6535	4.55992	0.677755	4.20116	62.985	2.08286e-15	4.78983e-14
ERO1B	0.949705	1.24867	0.925849	1.45688	1.21303	1.61836	0.678093	0.529477	7.46675	0.0062849	0.0200796
LGALSL	3.86785	3.75402	3.8122	4.41078	4.42358	4.51708	0.678256	4.08814	70.8838	3.78897e-17	1.02908e-15
GSTA4	0.640516	0.86429	0.864261	1.07093	1.01159	1.26706	0.678349	0.00987379	7.52139	0.00609705	0.0196049
RASAL2	6.30872	6.08321	6.31278	6.90162	6.90058	6.92764	0.678358	6.59895	77.4787	1.34159e-18	4.06287e-17
KLK10	2.6174	3.12566	2.63542	3.35555	3.42619	3.45327	0.67837	2.97898	17.1779	3.40371e-05	0.000205289
MATN2	5.48733	5.24388	5.48028	6.10473	6.05587	6.06114	0.678689	5.75391	68.9212	1.02479e-16	2.64946e-15
ELFN1	0.846721	0.68591	0.843134	0.975659	1.19583	1.18523	0.679327	0.0102358	8.053	0.00454285	0.0152544
DAW1	2.16555	1.16601	2.30546	2.49003	2.48898	2.50369	0.680143	1.93056	3.52588	0.0604176	0.127507
NR2F1	3.41424	2.66587	3.18977	3.66742	3.80066	3.74933	0.680944	3.33383	12.4497	0.000418058	0.00192552
ZFPM2	0.969448	0.709451	0.799927	1.14285	1.31209	1.04381	0.681442	0.0912111	7.86601	0.00503726	0.0166246
VSTM1	1.0643	0.637642	1.18289	1.17752	1.32796	1.54152	0.681669	0.39938	5.38044	0.0203637	0.0527429
ANKRD13A	5.9628	5.51666	5.97441	6.48065	6.51079	6.52458	0.681891	6.18933	31.9209	1.60583e-08	1.79056e-07
FAM102B	4.73059	4.51814	4.70681	5.36429	5.27042	5.31099	0.682577	4.97987	74.0752	7.51985e-18	2.13686e-16
DYRK2	5.01692	4.77818	5.09425	5.58207	5.69278	5.62679	0.682699	5.3055	55.0434	1.17899e-13	2.30457e-12
FAM49A	3.9961	3.58932	3.92961	4.52622	4.45644	4.50026	0.683824	4.13118	35.5932	2.43134e-09	3.01894e-08
PLEKHA8	4.47493	4.34484	4.45681	5.05389	5.10414	5.0972	0.684058	4.74267	95.2678	1.66296e-22	6.72536e-21
COL4A2	9.83682	9.156	9.95242	10.2956	10.4025	10.4168	0.684613	10.0695	11.5571	0.000674923	0.00292187
CASC10	1.5175	1.28046	1.51224	1.82806	1.99765	1.90064	0.684772	1.19342	15.5561	8.00915e-05	0.000441376
TNC	4.96131	4.78235	5.1523	5.57884	5.72084	5.62058	0.685454	5.31128	46.281	1.02451e-11	1.69668e-10
AIM1L	5.31383	5.59221	5.36272	6.06536	6.11994	6.11793	0.685852	5.77874	64.2434	1.09957e-15	2.61003e-14
MSI1	2.02168	1.65248	2.29771	2.43379	2.57793	2.66332	0.688868	2.00765	10.744	0.00104617	0.0042765
SLC16A2	3.00468	2.73058	3.1559	3.67654	3.52587	3.57072	0.689478	3.17129	26.5449	2.57484e-07	2.34424e-06
CDR2L	5.16232	4.78235	5.15123	5.65845	5.77467	5.71181	0.689992	5.3854	40.6754	1.79734e-10	2.55088e-09
SYK	4.57659	4.76841	4.54777	5.28802	5.27759	5.34247	0.690917	4.96359	75.2793	4.0863e-18	1.1927e-16
PTPRH	1.36188	2.47304	1.44372	2.53751	2.38663	2.21295	0.691338	1.79432	3.07884	0.0793171	0.158401
BIRC7	1.42043	2.34362	1.23248	1.97323	2.41662	2.38409	0.692624	1.65421	2.96859	0.0848957	0.166983
KIAA1644	4.68803	4.04518	4.67279	5.15628	5.20747	5.13474	0.692874	4.82274	17.0936	3.55817e-05	0.000213905
HDAC3	6.06785	6.11606	6.03389	6.78774	6.74231	6.743	0.693023	6.43989	131.559	1.86829e-30	1.18733e-28
NOD1	2.76025	3.02136	2.74199	3.47532	3.38506	3.52155	0.693303	3.02772	33.3524	7.68812e-09	8.94359e-08
CXADR	4.87628	4.72864	4.77673	5.55184	5.41301	5.43743	0.693496	5.13217	85.3558	2.49226e-20	8.66648e-19
TTLL11	2.64221	2.67786	2.62308	3.25771	3.3349	3.15963	0.694671	2.79609	40.0632	2.45882e-10	3.42562e-09
KRT16	3.39976	3.5111	3.62374	4.20776	4.10461	4.16673	0.694845	3.77626	55.6998	8.44287e-14	1.6783e-12
TEAD2	4.33165	4.43232	4.33156	4.93863	5.12359	5.03549	0.695341	4.68606	77.5579	1.28888e-18	3.94961e-17
AMOTL1	7.19499	7.20576	7.24825	7.87162	7.93005	7.92218	0.695362	7.5963	124.963	5.18396e-29	3.06781e-27
SAMD12	4.4132	4.64869	4.533	5.22521	5.21603	5.17875	0.695813	4.86302	78.7319	7.1136e-19	2.21139e-17
LAMA2	1.1533	0.965524	1.16597	1.51224	1.54716	1.4742	0.697102	0.629089	13.0684	0.00030032	0.00143285
MYLK	4.62718	4.29902	4.75002	5.25087	5.24453	5.2388	0.697117	4.90148	38.2461	6.23622e-10	8.32851e-09
RNF144A	3.65576	3.62998	3.73402	4.32448	4.3594	4.301	0.698317	3.95169	77.3869	1.40544e-18	4.24628e-17
ADAMTS7	1.67008	1.72357	1.81318	2.10512	2.42402	2.23752	0.700289	1.63807	18.2257	1.96213e-05	0.0001249
PCDHGA1	0.909389	1.06012	1.31152	1.16029	1.63908	1.70312	0.700314	0.641384	6.09578	0.0135505	0.0379045
CPNE4	2.23244	2.15932	2.32845	2.7424	2.79899	2.91759	0.702182	2.30707	29.6952	5.05589e-08	5.20559e-07
CSRP1	7.46584	7.68672	7.56249	8.28843	8.30166	8.23197	0.702711	7.96092	83.4649	6.48579e-20	2.17899e-18
NTN4	6.32748	6.07077	6.33424	6.93175	6.96669	6.93923	0.704023	6.62537	73.2207	1.15932e-17	3.27992e-16
RAPGEF2	5.49757	5.23782	5.52657	6.09059	6.07833	6.18103	0.704036	5.78815	61.5152	4.39329e-15	9.83989e-14
MBOAT1	4.0341	4.51981	4.25964	4.94368	4.92009	5.01669	0.704665	4.60666	33.6328	6.65624e-09	7.80656e-08
TCF7L1	2.37989	2.12472	2.50697	2.90119	3.02996	2.87646	0.705125	2.4381	23.0401	1.58655e-06	1.26502e-05
HERC1	5.44653	4.94116	5.58977	5.94289	6.05825	6.12617	0.706568	5.71315	19.2981	1.11816e-05	7.48981e-05
SLCO4C1	0.846721	0.843162	0.73259	1.19454	0.971745	1.28289	0.708094	0.0600613	8.64181	0.00328534	0.0115867
RAB11FIP4	4.03644	4.35233	4.04281	4.87274	4.81422	4.79601	0.708147	4.4682	48.7651	2.88536e-12	5.07139e-11
SLC25A21-AS1	1.55719	1.85604	1.67653	2.23422	2.31677	2.1279	0.708507	1.59387	18.7355	1.5016e-05	9.77401e-05
TPBGL	0.825212	0.56207	0.426578	0.830743	0.706334	1.13381	0.709282	-0.409543	4.42842	0.0353452	0.0824124
PRODH	1.57018	2.45922	1.66453	2.40483	2.64914	2.47643	0.709366	1.94255	5.51358	0.0188694	0.0495995
C10orf95	1.10056	1.40102	1.114	1.69082	1.65174	1.63078	0.709731	0.837716	13.4708	0.000242302	0.00118452
KDELC1	3.61246	2.92912	3.45644	3.97141	3.92585	4.14308	0.711133	3.61795	15.2413	9.461e-05	0.000513273
ADA	2.3273	2.21794	2.26631	2.88555	2.85482	2.84483	0.711593	2.34961	36.8653	1.26577e-09	1.62808e-08
FREM2	2.67865	2.02504	3.03999	3.29765	3.22478	3.25496	0.71249	2.79752	7.04953	0.0079286	0.0243714
RHOD	5.21599	5.14914	5.26681	5.85327	6.00927	5.86157	0.713496	5.57379	91.9078	9.081e-22	3.45587e-20
SPTLC3	2.0682	2.22613	2.04364	2.56395	2.63645	2.86073	0.713772	2.15337	22.7219	1.87225e-06	1.46565e-05
ITGBL1	2.11327	1.71197	2.1507	2.4692	2.57128	2.66935	0.7144	2.0109	16.6438	4.5097e-05	0.000264935
TENM4	1.78595	1.68847	1.94793	2.22596	2.3247	2.50369	0.714505	1.75075	18.9995	1.30756e-05	8.61094e-05
BCAS1	2.05902	2.50702	2.15927	2.89079	2.84383	2.80703	0.715513	2.33176	20.0886	7.39356e-06	5.15313e-05
GABBR2	2.62986	1.59044	2.47985	2.95213	2.98062	2.75693	0.718687	2.39003	5.37709	0.0204029	0.0528125
KIAA0513	2.64835	2.77589	2.70148	3.36686	3.4225	3.22251	0.718706	2.8834	40.4631	2.00362e-10	2.8374e-09
FAS	2.64835	3.04468	2.76464	3.49263	3.50159	3.40348	0.719083	3.02274	29.7027	5.03656e-08	5.18983e-07
NAV1	3.01896	2.81439	3.28294	3.6946	3.65414	3.75217	0.719108	3.2773	27.9077	1.27242e-07	1.21776e-06
LOC100128361	2.03111	1.67657	1.928	2.44806	2.5646	2.3088	0.719236	1.85481	18.3581	1.83035e-05	0.000117129
KIF9-AS1	1.74071	1.62798	1.70022	2.06865	2.11205	2.45564	0.719527	1.58457	15.704	7.40672e-05	0.000413475
NYNRIN	4.12272	4.0521	4.10847	4.81474	4.79008	4.73692	0.719576	4.4151	100.523	1.1702e-23	5.24193e-22
NKX1-2	1.62099	2.04369	1.34196	2.2587	2.17482	2.26167	0.71983	1.59557	9.32059	0.00226594	0.00838819
PCDHA8	0.640516	0.777855	0.509378	0.645069	1.01159	1.15116	0.719933	-0.318287	5.04676	0.024672	0.0618407
ZSWIM5	2.13965	2.43824	2.22608	2.96211	2.78755	2.86073	0.720379	2.35815	26.5806	2.52776e-07	2.30463e-06
CDC42EP1	4.82573	4.90721	4.83541	5.49285	5.65081	5.52403	0.720443	5.21246	97.8372	4.54244e-23	1.89651e-21
MGAT5B	4.92512	4.84613	4.98396	5.56581	5.65946	5.63683	0.720506	5.27751	106.999	4.45462e-25	2.16049e-23
GJB4	2.04977	2.27428	2.18469	2.86443	2.75271	2.66332	0.721004	2.23127	27.7957	1.34826e-07	1.28748e-06
MAP2K6	1.11836	0.984946	1.02299	1.61698	1.38975	1.3595	0.721742	0.543324	12.018	0.000526901	0.00235862
SOX9	3.88094	2.79802	3.62992	4.23063	4.14548	4.15173	0.721893	3.78288	6.98031	0.00824113	0.0250919
ADRA2C	1.23713	1.04169	0.821692	1.4986	1.51979	1.3595	0.722298	0.543569	10.2084	0.00139805	0.00552581
ATP10A	3.21777	2.7703	3.24317	3.72714	3.69449	3.81881	0.723146	3.3263	24.8789	6.10471e-07	5.25747e-06
RIMS4	0.803377	0.612889	1.06009	1.17752	1.21303	1.21852	0.725089	0.132557	8.28422	0.00399911	0.0137066
BBS10	3.1018	3.47378	3.26319	3.90832	3.95169	3.99965	0.725364	3.54562	39.6557	3.02914e-10	4.17064e-09
AUTS2	3.66184	3.61759	3.75113	4.33987	4.40126	4.33365	0.725609	3.97288	79.5872	4.61413e-19	1.46258e-17
HEYL	1.13594	1.38649	1.21614	1.62955	1.807	1.70312	0.725781	0.911566	15.1511	9.92417e-05	0.000535698
FAM86HP	1.26935	1.61558	1.29605	1.81711	1.92647	1.94109	0.726329	1.15906	14.8689	0.00011525	0.000610862
GRIP1	2.60483	2.22613	2.54672	3.13521	3.17301	2.94768	0.726463	2.60103	23.2471	1.42464e-06	1.14442e-05
AGO1	5.56725	5.37571	5.62964	6.21834	6.2354	6.27551	0.727506	5.9068	82.9341	8.48337e-20	2.82801e-18
LINC00431	2.14833	2.09821	2.62926	2.70725	3.03963	2.99647	0.728806	2.41156	13.2957	0.000266009	0.00128579
KIAA1683	0.564666	0.777855	0.612867	0.830743	1.26341	0.757096	0.729467	-0.293848	5.18438	0.0227908	0.0578901
ARF4	7.03087	7.00011	7.10971	7.80979	7.75678	7.75268	0.73	7.44775	126.299	2.64423e-29	1.60156e-27
GPR161	3.53177	3.56694	3.71088	4.34178	4.25121	4.26958	0.73048	3.89721	69.3598	8.2043e-17	2.14693e-15
PYGO1	2.78832	2.54677	2.94898	3.37435	3.34663	3.51821	0.730797	2.96243	28.5308	9.22187e-08	9.03352e-07
SLC9A2	4.07112	3.50775	4.01946	4.57417	4.61359	4.55504	0.732843	4.20265	24.6849	6.751e-07	5.75545e-06
HOXC9	0.590395	1.02302	0.612867	1.14285	0.991807	1.1683	0.7343	-0.0420423	6.69958	0.00964358	0.0286359
FMNL2	3.73575	3.23108	3.88378	4.43426	4.29021	4.26161	0.734559	3.94039	18.9957	1.31014e-05	8.62353e-05
SYBU	1.18742	1.26465	1.44372	1.78375	1.84058	1.72645	0.7349	1.00427	16.9161	3.90679e-05	0.00023334
PTPN13	3.83325	3.50439	3.95691	4.49048	4.42543	4.49178	0.734925	4.08568	37.0255	1.16597e-09	1.50723e-08
NFATC2	5.35193	5.08422	5.40207	5.96786	6.00681	6.04904	0.737121	5.66497	64.2096	1.11862e-15	2.64365e-14
BIVM	2.86936	2.74204	2.6778	3.41849	3.36981	3.45677	0.737728	2.96018	48.1434	3.96166e-12	6.87878e-11
OSR1	1.1533	0.885113	0.984914	1.35457	1.449	1.48792	0.737902	0.493982	12.6329	0.000379019	0.00176741
GOLGA7B	3.09732	3.75967	3.30242	4.19935	4.0241	4.06058	0.738079	3.69265	17.6974	2.58985e-05	0.000161098
LINC00452	0.781207	0.56207	0.612867	0.89464	0.909828	1.09848	0.738172	-0.286624	7.79508	0.00523887	0.0171932
TMC7	2.66661	2.63547	2.74199	3.3631	3.31911	3.30231	0.739049	2.86371	51.9121	5.80427e-13	1.07433e-11
MACF1	7.63647	6.84933	7.84698	8.17534	8.30216	8.24187	0.740015	7.91312	8.89942	0.00285261	0.0102625
VASH2	1.58305	1.72357	1.62794	2.32977	1.93686	2.26963	0.740851	1.5343	16.5461	4.74811e-05	0.000277174
FAM149A	1.0643	0.945837	0.777829	1.228	1.27982	1.48792	0.743039	0.344779	10.4072	0.00125524	0.00502758
SOX21-AS1	1.64574	1.98702	1.928	2.5241	2.446	2.3318	0.743576	1.83649	20.996	4.60244e-06	3.34324e-05
GLT8D2	2.65446	2.46615	2.54017	3.31721	3.18613	3.08036	0.744206	2.71693	35.6556	2.35475e-09	2.93513e-08
SLC2A13	1.59581	1.48526	1.72353	2.07786	2.24336	2.11027	0.744818	1.47624	21.4505	3.63073e-06	2.68887e-05
CAV1	8.28789	7.88856	8.27244	8.93724	8.89208	8.88494	0.745893	8.57682	45.7644	1.33368e-11	2.18626e-10
CTNND2	2.67264	2.17631	2.71898	3.19564	3.29105	3.06213	0.74647	2.70255	17.6209	2.69614e-05	0.000166825
LRRC37A3	0.909389	0.945837	1.31152	1.36963	1.51979	1.61836	0.746704	0.603728	9.86134	0.00168788	0.00650593
AHNAK2	8.25559	8.01232	8.45008	8.89474	9.08119	9.00368	0.746764	8.66694	42.0869	8.73075e-11	1.29764e-09
ENOX1	2.25675	1.90783	2.25035	2.76537	2.75857	2.74555	0.746863	2.21479	25.8106	3.7661e-07	3.35541e-06
MID2	2.42348	2.58546	2.64766	3.34034	3.1193	3.12931	0.74715	2.71852	33.4501	7.31161e-09	8.53639e-08
CPLX1	1.28519	1.71197	1.114	1.94333	1.99765	1.74941	0.747982	1.15654	9.26003	0.00234209	0.0086379
ABCA13	2.04977	1.80232	1.84541	2.63426	2.3088	2.49692	0.747983	1.89609	20.6581	5.49033e-06	3.9198e-05
SLC5A3	4.26131	4.09295	4.34665	4.96987	4.95755	4.93518	0.747986	4.58358	81.0359	2.21652e-19	7.20284e-18
TNRC6A	7.20465	7.20627	7.19114	7.93472	7.98551	7.91917	0.749998	7.61439	148.002	4.73861e-34	3.51338e-32
SOX11	3.56459	3.31787	3.51439	4.15002	4.15441	4.19418	0.75062	3.76153	62.9114	2.16222e-15	4.96348e-14
LOC100130476	1.00814	1.35698	1.09625	1.70277	1.63908	1.5283	0.750935	0.775318	13.2922	0.000266514	0.00128775
ZBED3	1.20418	1.16601	1.02299	1.5915	1.50591	1.6674	0.751555	0.725366	15.6558	7.59797e-05	0.000422688
KISS1	2.14833	1.41541	2.30546	2.41938	2.68038	2.69914	0.753554	2.03493	6.97	0.00828875	0.0251976
SATB1	2.40185	3.10362	2.53359	3.35933	3.32702	3.43569	0.753828	2.90949	13.819	0.000201288	0.00100847
TMEM74	0.615673	0.885113	0.925849	1.17752	1.23002	1.1683	0.754766	0.102969	10.2793	0.00134532	0.00534031
KDM7A	1.93397	1.62798	1.65244	2.28278	2.38663	2.26963	0.75534	1.68286	21.939	2.81462e-06	2.12845e-05
SNPH	0.846721	0.925879	0.799927	1.228	1.35918	1.15116	0.75542	0.195948	11.5523	0.000676644	0.00292834
RCN3	0.688953	0.965524	0.73259	1.2607	1.01159	1.23489	0.756642	0.0724084	9.27218	0.00232661	0.00858569
GPR155	0.949705	0.612889	1.114	1.30839	1.19583	1.41799	0.756649	0.298411	8.12565	0.00436432	0.0147357
RFTN1	2.3273	1.97736	2.48668	2.87503	2.97055	2.88167	0.756845	2.38729	20.9335	4.75518e-06	3.4445e-05
ANKRD18B	3.00946	2.63547	2.9735	3.55657	3.51204	3.60574	0.758487	3.10866	35.0369	3.23519e-09	3.96101e-08
FAT1	8.61669	7.89675	8.76924	9.14198	9.28946	9.26286	0.759882	8.9001	12.0253	0.000524825	0.0023526
ITGA2	6.22188	6.03802	6.29052	6.94281	6.93304	6.94515	0.761105	6.59826	98.2701	3.65043e-23	1.56459e-21
TMEM40	3.41424	3.36311	3.62064	4.20776	4.09537	4.22522	0.761243	3.76924	56.413	5.87399e-14	1.18964e-12
NAP1L1	8.91508	8.74013	8.86594	9.62677	9.56594	9.61487	0.761806	9.26982	106.871	4.7504e-25	2.28675e-23
NLRP3	1.37674	1.18292	1.48522	1.91279	1.79564	1.87999	0.761838	1.1032	18.2325	1.95517e-05	0.000124623
MCAM	4.1337	3.70802	4.1413	4.75144	4.74499	4.70204	0.762107	4.3495	39.2306	3.76584e-10	5.13564e-09
SNX30	4.19996	4.37827	4.23349	5.11329	4.955	4.93768	0.762358	4.62971	78.3008	8.84844e-19	2.74408e-17
VGLL1	2.14833	1.64028	2.19306	2.55738	2.61721	2.69323	0.763224	2.0535	15.5298	8.12145e-05	0.000446991
COL4A1	9.32323	8.5073	9.42781	9.84922	9.9326	9.92769	0.764152	9.57018	10.7671	0.00103322	0.00422894
SLC12A6	4.51411	4.607	4.58483	5.33292	5.26939	5.32156	0.764204	4.94138	131.8	1.65516e-30	1.05709e-28
CPOX	5.72438	5.71868	5.75583	6.50772	6.46443	6.48579	0.764214	6.13872	164.764	1.02995e-37	8.68459e-36
MTURN	3.41063	3.62689	3.58926	4.26125	4.30632	4.21082	0.76611	3.85421	69.5144	7.58598e-17	1.98916e-15
SEMA5A	5.53697	5.22256	5.67817	6.21729	6.23855	6.28142	0.767725	5.89454	46.8697	7.58648e-12	1.27772e-10
FGFBP1	2.13965	2.45922	1.97731	2.83759	2.77024	2.90741	0.768237	2.30319	21.4562	3.62e-06	2.68246e-05
C12orf76	2.12212	2.24236	1.76905	2.70131	2.58455	2.73983	0.769134	2.114	20.3575	6.42417e-06	4.52145e-05
PARD6A	0.781207	0.925879	0.90561	1.2607	1.17843	1.37435	0.769496	0.234267	12.2347	0.000469086	0.00213087
AFAP1L1	5.28851	4.95354	5.42714	6.01594	5.95537	5.99903	0.769776	5.6346	43.9044	3.44805e-11	5.37238e-10
PGBD5	4.17892	3.95942	4.17762	4.83252	4.90033	4.80425	0.772207	4.46297	80.4509	2.98013e-19	9.54012e-18
HOXC11	0.688953	0.661978	0.661954	1.21137	0.888584	0.907565	0.773587	-0.225137	8.41952	0.00371214	0.0128461
LOC100499489	1.0643	0.965524	1.35694	1.5915	1.70132	1.54152	0.774221	0.74892	13.1188	0.00029234	0.00139685
LGI2	0.712576	0.454726	0.885084	1.12521	1.17843	0.801712	0.775573	-0.165809	6.16194	0.0130528	0.0368156
MAPK11	2.28853	2.9241	2.39529	3.15708	3.3544	3.18511	0.77584	2.74622	15.4327	8.54961e-05	0.000467763
GAB2	4.4132	4.14352	4.37821	5.03511	5.08559	5.0701	0.777648	4.68536	80.2734	3.26024e-19	1.0411e-17
BDNF	3.06097	2.13344	3.06758	3.49263	3.51551	3.50815	0.777911	3.04337	8.45984	0.00363074	0.012622
COBLL1	3.91698	3.70216	3.80676	4.55122	4.56922	4.51708	0.778048	4.14926	85.4173	2.41595e-20	8.42382e-19
SLC35F1	1.11836	0.68591	0.984914	1.38455	1.34366	1.37435	0.779635	0.380007	11.1687	0.000831911	0.00351654
TNF	1.92388	1.44376	1.83474	2.29862	2.30078	2.41313	0.781101	1.70438	17.6502	2.65484e-05	0.000164743
ADGRF1	0.825212	1.64028	1.21614	1.86042	1.73741	1.71483	0.781249	0.971632	6.54119	0.0105405	0.0308842
STMN3	1.98335	2.33608	2.10705	2.79915	2.79899	2.76821	0.781313	2.23952	30.181	3.93541e-08	4.13106e-07
TARSL2	3.41424	3.13438	3.43894	4.06695	3.9695	4.13002	0.782478	3.6343	48.785	2.85617e-12	5.02694e-11
RBMS2	6.9106	6.92826	6.89682	7.67432	7.68139	7.71326	0.782825	7.34418	169.25	1.07863e-38	9.79959e-37
MEX3D	4.32592	4.11956	4.18393	4.98829	4.96391	4.93768	0.783984	4.57971	99.8148	1.67336e-23	7.46991e-22
ADAMTS15	2.39456	2.24236	2.63542	3.03007	3.14641	3.12493	0.784167	2.59433	30.5932	3.18205e-08	3.39832e-07
WNT11	0.929688	0.509396	0.864261	1.08925	1.29605	1.09848	0.790049	0.0420932	8.50699	0.00353786	0.0123483
ACVR2B	3.07471	2.96868	2.85712	3.62724	3.66042	3.74933	0.790149	3.22831	57.0922	4.15862e-14	8.58405e-13
GPRC5A	7.64513	7.73591	7.65006	8.47482	8.45743	8.46882	0.792371	8.12072	149.757	1.95929e-34	1.46958e-32
KRT34	1.00814	0.56207	1.04166	1.10734	1.34366	1.44637	0.792859	0.277583	7.44543	0.00635977	0.0202887
ST6GALNAC3	0.888801	1.13157	1.14886	1.5915	1.46344	1.5283	0.792992	0.620569	15.5038	8.23412e-05	0.000452421
SYDE1	1.22075	1.16601	1.18289	1.84971	1.43441	1.74941	0.794302	0.851688	14.3549	0.000151387	0.000782471
BACE1	4.50399	4.31061	4.4358	5.16495	5.21816	5.17557	0.796189	4.8046	114.13	1.22046e-26	6.34883e-25
SH3GL1	7.13888	7.25608	7.23564	7.94937	8.07418	7.98337	0.796274	7.65404	128.327	9.52109e-30	5.84912e-28
AHNAK	9.81835	8.85475	10.0015	10.3809	10.5064	10.4194	0.798909	10.0907	7.54639	0.00601303	0.0193868
C2orf88	0.803377	0.587703	0.709427	1.21137	0.909828	1.06227	0.80003	-0.130667	9.5526	0.00199666	0.00751209
FOXN3	5.173	4.96336	5.18206	5.87323	5.87934	5.9247	0.800889	5.52392	104.788	1.35962e-24	6.40161e-23
ENDOD1	5.48391	5.10766	5.49474	6.21417	6.12392	6.1474	0.804288	5.79637	55.2457	1.06365e-13	2.08543e-12
CCDC85A	1.13594	1.21617	1.06009	1.65437	1.6263	1.61836	0.804461	0.767771	19.634	9.37872e-06	6.41542e-05
PKN2	6.10011	6.14116	6.17743	6.94092	6.92654	6.94484	0.806299	6.57874	186.734	1.64171e-42	1.83827e-40
SOX15	1.49043	1.72357	1.40098	2.17541	2.00754	2.17953	0.806801	1.42635	21.272	3.98501e-06	2.92938e-05
ANKRD13B	3.84933	3.37787	3.7426	4.44141	4.50959	4.32984	0.807727	4.01596	37.7698	7.96041e-10	1.05007e-08
ADD2	3.48453	2.99765	3.44947	4.01997	4.09073	4.10354	0.807782	3.64055	33.3881	7.5485e-09	8.79704e-08
GMPR	1.37674	1.32686	1.32682	1.92304	1.88416	1.84843	0.80784	1.11536	24.8708	6.1303e-07	5.27598e-06
REV3L	4.08023	3.96677	4.09513	4.80507	4.81704	4.84213	0.810902	4.42332	121.088	3.65606e-28	2.06872e-26
WHAMMP2	0.758691	0.637642	0.777829	1.10734	1.16082	1.04381	0.810983	-0.0683627	11.6856	0.000629843	0.00275631
PRRG1	3.00468	3.11688	3.1559	3.80956	3.85369	3.82962	0.811341	3.3828	76.73	1.96001e-18	5.86684e-17
GPR1	2.19939	1.79133	2.31316	2.85376	2.76442	2.73409	0.817858	2.22182	21.7538	3.09973e-06	2.33312e-05
FBLIM1	0.758691	1.55189	0.984914	1.62955	1.67674	1.61836	0.817953	0.775297	6.47367	0.0109484	0.0318362
PCDH1	4.65183	5.3031	4.83541	5.71779	5.80191	5.74431	0.818422	5.37767	26.3999	2.77552e-07	2.51984e-06
CBL	5.23752	4.71271	5.32987	5.85528	5.9419	5.95712	0.819025	5.54391	28.4319	9.70515e-08	9.47814e-07
MSANTD4	3.45682	3.57016	3.38514	4.29519	4.24287	4.16886	0.821076	3.80954	81.451	1.79666e-19	5.88292e-18
RHOV	4.46105	3.35566	4.35787	4.93863	4.99406	4.83006	0.821899	4.52354	7.84528	0.00509535	0.0167734
RDH13	3.17164	3.44252	3.30242	4.03659	4.06255	4.10576	0.823237	3.63153	68.9251	1.02276e-16	2.64946e-15
PARD3B	1.23713	1.18292	1.4988	1.93322	1.70132	1.93109	0.823276	1.07581	17.4901	2.88807e-05	0.000177673
ANOS1	3.01896	2.52704	2.87805	3.54334	3.66042	3.45327	0.823516	3.08019	29.6305	5.2275e-08	5.36515e-07
FAM134B	0.929688	1.13157	0.843134	1.47092	1.53354	1.29854	0.823759	0.471262	13.9339	0.000189356	0.000957993
YPEL1	1.08255	1.5777	1.29605	1.86042	1.807	1.98044	0.823955	1.10906	14.8884	0.000114063	0.000605567
SMIM5	1.13594	1.31156	1.29605	1.81711	1.78418	1.74941	0.823976	0.971808	22.5433	2.0546e-06	1.59389e-05
EML1	1.11836	0.885113	1.19961	1.52576	1.70132	1.46035	0.82484	0.66233	14.8932	0.000113772	0.000604271
FGF13	1.26935	1.41541	1.32682	1.98306	1.8516	1.83776	0.82568	1.11825	23.877	1.02691e-06	8.44371e-06
C2orf54	3.94965	4.27555	4.1173	4.91956	4.87894	4.93016	0.825902	4.50908	77.5594	1.28789e-18	3.94961e-17
SGK1	2.72003	2.65379	2.80344	3.5199	3.49808	3.34439	0.826895	2.97156	55.5509	9.10718e-14	1.79853e-12
DNAH5	5.99205	5.90033	6.08821	6.75584	6.83059	6.85077	0.82727	6.44565	134.036	5.36456e-31	3.53103e-29
CDSN	1.77477	1.49884	1.5904	2.06865	2.22653	2.3914	0.828815	1.5591	21.4908	3.55523e-06	2.64206e-05
FAT3	2.76591	1.94797	3.03068	3.43649	3.27476	3.4143	0.830779	2.8838	8.14259	0.00432375	0.0146176
LINGO2	0.888801	0.945837	0.864261	1.29267	1.29605	1.44637	0.831962	0.32958	15.5602	7.99178e-05	0.000441172
FGFR2	3.76146	3.33311	3.70503	4.3475	4.34583	4.4781	0.832473	3.96862	44.3279	2.77727e-11	4.3748e-10
PTCHD1	1.0643	0.56207	1.114	1.27677	1.35918	1.5283	0.833088	0.399543	8.15812	0.00428689	0.0145158
SERINC5	4.71897	5.03848	4.93487	5.73244	5.72908	5.68749	0.834163	5.33267	87.7677	7.36122e-21	2.66762e-19
ZNF704	3.27838	2.73058	3.35561	3.89275	3.94141	3.89028	0.834359	3.45705	24.4553	7.6054e-07	6.41709e-06
EP300	6.59111	6.35077	6.74099	7.35136	7.46792	7.37305	0.83519	7.03222	67.586	2.01692e-16	5.10202e-15
PDE11A	0.735817	0.709451	0.661954	1.10734	1.08813	1.06227	0.835956	-0.109488	12.4433	0.0004195	0.00193009
HECA	2.63605	2.70739	2.61687	3.2937	3.4445	3.41788	0.836976	2.89208	60.4386	7.59105e-15	1.66551e-13
LRRN2	3.94217	4.08847	4.16064	4.88982	4.88566	4.82061	0.837252	4.45941	104.642	1.46324e-24	6.86448e-23
SMIM10	0.909389	0.777855	0.90561	1.45688	1.14299	1.29854	0.838225	0.261423	13.3232	0.000262149	0.00126991
LMX1B	0.949705	0.732615	0.821692	1.30839	1.16082	1.32934	0.838695	0.201209	13.8721	0.000195678	0.000987266
NBPF18P	1.00814	1.32686	1.24864	1.52576	1.78418	1.86955	0.838896	0.897689	15.0785	0.000103129	0.000554128
FAM84A	1.75215	1.78025	1.73504	2.55079	2.33259	2.28543	0.839629	1.75119	29.9838	4.35666e-08	4.52903e-07
E2F5	4.22482	3.79586	4.25764	4.94116	4.9214	4.8712	0.841344	4.50534	45.5787	1.46628e-11	2.39146e-10
FAT4	2.04977	1.55189	2.01559	2.58992	2.48898	2.57611	0.846462	1.93906	21.0123	4.56347e-06	3.32242e-05
TNXB	1.39146	1.79133	1.57766	2.10512	2.17482	2.35444	0.847883	1.52806	20.561	5.77599e-06	4.11236e-05
AKT2	6.93151	7.00755	7.00362	7.82285	7.85057	7.81573	0.853555	7.45922	186.72	1.65289e-42	1.83827e-40
HRASLS2	0.564666	0.755412	0.612867	0.830743	1.21303	0.986989	0.853943	-0.239861	9.39015	0.00218154	0.00811769
ARL4C	3.34035	3.26325	3.1687	4.03422	4.06255	4.03745	0.854414	3.59506	91.9579	8.85395e-22	3.38946e-20
TLN2	3.07015	2.15932	3.15161	3.48918	3.59307	3.76912	0.855267	3.142	9.16895	0.00246155	0.00901917
SNAP91	0.664938	0.755412	0.535954	1.01452	1.10665	0.967539	0.855627	-0.217375	11.394	0.000736809	0.00315381
TNFRSF21	6.23468	6.1901	6.25496	7.05484	7.07791	7.09215	0.856845	6.69917	212.287	4.3553e-48	6.38497e-46
DPYSL5	2.37989	2.21794	2.33603	3.09043	3.03481	2.98685	0.86145	2.49522	52.2883	4.79223e-13	8.89562e-12
ATL3	5.2426	5.29534	5.2225	6.09343	6.04391	6.15494	0.861456	5.71079	168.253	1.78147e-38	1.58502e-36
TBX1	1.11836	0.86429	1.06009	1.4427	1.6263	1.48792	0.864127	0.582871	17.5309	2.82674e-05	0.000174071
PSG5	0.484607	0.732615	1.09625	1.38455	1.10665	1.1683	0.864362	0.120678	7.07359	0.00782282	0.0240922
KIAA1211	3.46031	3.23108	3.62064	4.23475	4.27801	4.23948	0.865504	3.80873	60.1118	8.962e-15	1.95302e-13
LINC00842	4.293	4.18189	4.33913	5.02087	5.13603	5.15423	0.866041	4.69576	122.677	1.6407e-28	9.32453e-27
DISP2	3.7415	3.68148	3.80948	4.46616	4.59075	4.63119	0.868641	4.13578	102.643	4.01301e-24	1.84241e-22
PLCB4	3.93717	3.30248	4.0265	4.5346	4.63448	4.65873	0.868703	4.18347	21.6032	3.35288e-06	2.50662e-05
PSG4	1.99303	2.04369	1.90779	2.55079	2.76442	2.71088	0.870399	2.07852	39.7939	2.82222e-10	3.91079e-09
TMOD2	2.89023	2.74204	2.99281	3.73589	3.6415	3.5931	0.870779	3.17551	62.2364	3.04603e-15	6.93066e-14
CSF1R	1.50403	1.86655	1.65244	2.3527	2.37903	2.26963	0.870925	1.66672	28.1578	1.11815e-07	1.07973e-06
C4orf19	1.34687	1.48526	1.52557	2.10512	2.12118	1.9707	0.872215	1.33041	28.8629	7.76852e-08	7.72124e-07
BMP4	1.9035	2.12472	1.90779	2.63426	2.6988	2.70502	0.87255	2.07984	41.267	1.3279e-10	1.92919e-09
DOK3	1.78595	1.48526	1.90779	2.32204	2.58455	2.27755	0.874424	1.74613	20.7528	5.22554e-06	3.74943e-05
PIK3AP1	0.867914	1.35698	0.965493	1.55242	1.47773	1.77201	0.875651	0.705651	11.7527	0.00060755	0.00267235
DCP2	4.84856	4.97191	4.93737	5.79656	5.74616	5.78099	0.876304	5.377	173.75	1.12232e-39	1.07253e-37
LPAR3	0.781207	0.925879	0.587682	1.24444	1.03111	1.31402	0.876709	0.0785622	11.6408	0.000645198	0.00281587
GPR63	1.02711	1.09628	1.09625	1.36963	1.77263	1.63078	0.87674	0.69447	16.4942	4.87988e-05	0.000283838
PCED1B	2.09541	2.67786	2.04364	2.80471	3.20773	3.08488	0.879424	2.49322	14.8623	0.000115653	0.000612745
MYO6	5.80899	5.82488	5.86008	6.70921	6.67178	6.71812	0.87997	6.31277	217.527	3.13247e-49	4.98914e-47
B4GAT1	3.95708	4.11736	4.06579	4.91186	4.86541	4.88811	0.880546	4.46777	137.143	1.1219e-31	7.65798e-30
LRRC57	3.65576	3.88125	3.77921	4.57417	4.5924	4.66176	0.88386	4.17787	103.966	2.0584e-24	9.5868e-23
MIPEP	3.92711	4.01243	3.90178	4.80091	4.7829	4.78355	0.884598	4.36349	147.391	6.44641e-34	4.6986e-32
ANKRD1	3.48453	2.91401	3.4942	4.19301	4.0884	4.13657	0.885715	3.68481	29.4867	5.63006e-08	5.75087e-07
FAM189A2	1.28519	1.47156	1.24864	2.05007	1.97767	1.77201	0.887149	1.15662	22.7237	1.87046e-06	1.4653e-05
GDPD1	0.867914	1.04169	0.864261	1.21137	1.49189	1.5283	0.887716	0.419092	15.1365	0.000100009	0.000539162
RPIA	4.77614	4.71416	4.7585	5.64999	5.58547	5.60493	0.888722	5.20864	192.032	1.14471e-43	1.38017e-41
SCN8A	2.29637	2.20143	2.40973	3.03007	2.9956	3.13804	0.891924	2.50512	51.0948	8.80104e-13	1.60597e-11
SEMA7A	5.78899	5.676	5.76077	6.63438	6.65261	6.58086	0.892644	6.23064	191.417	1.55994e-43	1.86341e-41
ZNF106	6.45287	6.10556	6.65874	7.26888	7.29454	7.36169	0.893214	6.92171	45.9605	1.20662e-11	1.99062e-10
ADGRG2	2.34252	2.68381	2.52034	3.36686	3.23744	3.27883	0.893532	2.7716	47.9254	4.42743e-12	7.62593e-11
APAF1	4.42039	4.57692	4.51975	5.40325	5.359	5.35375	0.89452	4.95986	161.416	5.55078e-37	4.50381e-35
P3H2	4.96254	4.31061	4.99358	5.68354	5.56134	5.72924	0.896069	5.25305	24.7455	6.5423e-07	5.60068e-06
GPR78	1.26935	0.90564	1.06009	1.57859	1.61341	1.69131	0.896277	0.729542	19.1138	1.23148e-05	8.15573e-05
RBPMS	1.82981	1.73509	1.56481	2.3451	2.37903	2.44864	0.896419	1.7281	35.9012	2.07585e-09	2.61019e-08
MARCH3	0.781207	0.821719	0.984914	1.41392	1.23002	1.37435	0.898739	0.298538	16.6727	4.44152e-05	0.000261525
MAP3K5	0.735817	0.984946	0.885084	1.39931	1.35918	1.29854	0.900897	0.314371	17.3504	3.10831e-05	0.000189869
UNC5CL	0.428654	0.965524	0.637619	1.03357	1.05037	1.23489	0.901063	-0.0890486	8.45394	0.00364254	0.0126562
ZNF618	4.39871	4.19446	4.52473	5.21273	5.27452	5.26094	0.903155	4.83131	96.3248	9.74999e-23	3.99316e-21
UPF3B	4.32974	4.39106	4.34478	5.18957	5.24974	5.23778	0.903515	4.80686	187.886	9.20143e-43	1.05051e-40
TCHHL1	0.867914	0.535974	0.56205	1.03357	0.930764	1.21852	0.903901	-0.166306	10.3061	0.00132591	0.00528265
KIAA1161	4.85255	5.33845	4.92987	5.92643	5.96999	5.92533	0.904473	5.53584	51.5998	6.80492e-13	1.25415e-11
EPHA4	0.888801	0.799954	1.02299	1.45688	1.17843	1.54152	0.905306	0.389493	14.6416	0.000130011	0.000681266
ATL1	3.09732	3.11247	3.10356	3.88753	3.9871	3.91333	0.905384	3.4549	102.933	3.46757e-24	1.60341e-22
NKAIN1	0.484607	0.426594	0.864261	0.808799	1.14299	0.986989	0.90626	-0.31795	7.6315	0.00573577	0.0185549
DAB2	3.21363	3.38885	3.35187	4.16089	4.12973	4.18579	0.907775	3.69722	104.474	1.59303e-24	7.44627e-23
DMD	1.58305	1.93804	1.72353	2.55738	2.42402	2.36934	0.911154	1.79645	30.6466	3.09576e-08	3.31439e-07
CALU	7.86413	7.43883	7.87928	8.65252	8.61135	8.68612	0.91213	8.26177	58.6288	1.90405e-14	4.0535e-13
PRUNE2	1.25333	1.11403	1.31152	1.77245	1.88416	1.80526	0.913501	0.991596	27.0563	1.97618e-07	1.83152e-06
MUC4	6.63851	5.4588	6.96044	7.12894	7.55161	7.45608	0.915595	6.9954	5.14053	0.0233735	0.0591955
RPS6KA2	3.42142	3.54093	3.36305	4.26327	4.33015	4.29516	0.91614	3.83888	111.457	4.69988e-26	2.40608e-24
SETBP1	3.67091	3.20233	3.75679	4.39245	4.43645	4.43626	0.917183	3.97002	40.1254	2.38172e-10	3.32538e-09
FOXD2-AS1	1.10056	1.35698	1.02299	1.65437	2.00754	1.54152	0.918299	0.888153	14.2342	0.000161412	0.000829631
ZBED2	3.64965	3.94462	3.63608	4.7297	4.51999	4.60625	0.921995	4.17638	68.4474	1.30309e-16	3.34883e-15
ZDHHC8P1	2.04977	2.04369	1.96758	2.75393	2.81596	2.72832	0.923566	2.16299	55.0877	1.15268e-13	2.25656e-12
LOC100379224	1.20418	1.07831	1.09625	1.83893	1.65174	1.60583	0.926707	0.8235	23.4708	1.26824e-06	1.02709e-05
CCDC121	1.10056	1.16601	1.21614	1.65437	1.94717	1.61836	0.92724	0.884488	21.1044	4.34919e-06	3.18078e-05
ZNF652	4.2573	4.08847	4.31631	5.04101	5.12472	5.17451	0.927582	4.68412	120.557	4.77643e-28	2.66756e-26
PDX1	0.456902	0.86429	0.843134	1.01452	1.17843	1.32934	0.930396	0.0228469	10.4966	0.00119592	0.00482293
ANO2	1.30086	0.612889	0.945807	1.36963	1.51979	1.64309	0.931592	0.552298	8.93096	0.00280377	0.0101094
H1F0	6.87473	6.96631	6.80659	7.85348	7.75605	7.81862	0.931731	7.41194	173.593	1.21472e-39	1.14387e-37
TRABD2A	0.909389	0.732615	0.925849	1.36963	1.46344	1.21852	0.932383	0.304285	17.2624	3.25566e-05	0.00019756
SCN9A	1.36188	1.26465	1.53877	2.087	2.07491	1.95103	0.933366	1.27303	29.5927	5.33066e-08	5.458e-07
COL17A1	1.69401	1.55189	1.61553	2.21766	2.45325	2.26167	0.93436	1.61971	35.0363	3.23611e-09	3.96101e-08
FAM19A2	0.758691	0.755412	0.799927	1.39931	0.971745	1.29854	0.934751	0.114594	13.3478	0.000258726	0.00125671
FNIP2	2.87983	2.75906	2.88323	3.62724	3.75737	3.64606	0.934936	3.17453	84.4369	3.96682e-20	1.35029e-18
PVRL1	3.78393	4.06813	3.90688	4.77143	4.84074	4.83409	0.937275	4.37271	107.246	3.93216e-25	1.92154e-23
UPK3B	0.846721	0.732615	0.777829	1.29267	1.17843	1.29854	0.938207	0.150069	17.7951	2.46012e-05	0.000153769
DGCR5	1.69401	1.61558	1.68842	2.28278	2.46765	2.36934	0.944301	1.69107	41.7323	1.04663e-10	1.54315e-09
PXN	8.95818	8.94785	9.05223	9.87271	9.98135	9.94911	0.949615	9.53566	178.893	8.4557e-41	8.3913e-39
ERLIN2	4.28317	4.22948	4.27549	5.1671	5.17275	5.19033	0.950492	4.74026	211.99	5.05538e-48	7.32802e-46
ANKRD33B	6.65613	6.25603	6.60288	7.44525	7.49057	7.44667	0.953006	7.054	81.7773	1.52318e-19	5.00013e-18
SLC16A14	2.45883	1.93804	2.4661	3.16574	3.11474	3.06213	0.954872	2.54925	29.4761	5.661e-08	5.77332e-07
LPAR5	2.44479	2.88845	2.47985	3.47183	3.44814	3.44977	0.955798	2.92726	42.1402	8.4959e-11	1.26565e-09
MMP24	0.949705	0.68591	0.661954	1.07093	1.38975	1.26706	0.956032	0.127086	13.9087	0.000191912	0.000969403
C14orf132	1.08255	0.945837	1.14886	1.62955	1.77263	1.51497	0.962253	0.726096	22.8405	1.7602e-06	1.38804e-05
UST	2.31963	2.6416	2.18469	3.22494	3.19913	3.23069	0.963076	2.66219	41.6308	1.10241e-10	1.62226e-09
MIR663A	1.40602	1.14889	1.02299	1.70277	1.71345	2.02816	0.964538	0.978151	18.2693	1.91772e-05	0.000122357
PSG9	0.712576	0.426594	0.885084	1.05237	1.17843	1.1683	0.966316	-0.0683601	12.2936	0.000454507	0.00207634
CCDC80	7.16293	6.44406	7.14818	7.91833	7.91322	7.92328	0.968933	7.50801	26.3025	2.91907e-07	2.64459e-06
FST	2.04977	2.04369	1.98698	2.87503	2.76442	2.80155	0.971662	2.20248	61.1734	5.22625e-15	1.1665e-13
AQP11	0.370443	0.925879	0.612867	0.915325	1.08813	1.25106	0.973876	-0.144747	8.19117	0.00420947	0.0142987
CDH11	3.77274	3.39974	3.7021	4.57579	4.56588	4.51206	0.975933	4.08524	80.9086	2.36397e-19	7.62441e-18
TBC1D9	3.50496	3.27118	3.39607	4.3513	4.33801	4.21289	0.977036	3.82391	101.079	8.83944e-24	3.97344e-22
ST8SIA2	0.949705	1.11403	1.52557	1.80607	1.96757	1.78318	0.979168	1.01421	15.953	6.49341e-05	0.000365974
PTGS1	0.867914	0.637642	0.685886	1.29267	1.10665	1.21852	0.980027	0.05426	16.8244	4.10024e-05	0.000243878
PAG1	2.63605	2.28215	2.57263	3.23731	3.50508	3.31391	0.982222	2.80803	45.3824	1.62084e-11	2.63024e-10
SOX3	0.664938	0.48232	0.637619	0.808799	1.27982	0.907565	0.983442	-0.293774	10.2195	0.00138962	0.00549416
CAP2	4.1337	3.9471	4.04743	4.9587	5.0015	4.99284	0.983466	4.53126	165.289	7.9098e-38	6.7579e-36
RBM26-AS1	0.564666	0.885113	0.925849	1.42838	1.37455	1.09848	0.98692	0.212815	13.7111	0.000213188	0.00105945
CLDN12	4.8605	5.00676	4.96453	5.9857	5.87462	5.8642	0.987291	5.47556	180.706	3.39783e-41	3.479e-39
OPHN1	3.35543	3.26722	3.36305	4.13246	4.24913	4.34311	0.98775	3.75967	106.942	4.58332e-25	2.21458e-23
ADAMTSL4	2.59215	2.5918	2.59175	3.30158	3.5565	3.51151	0.992449	2.91917	70.6261	4.31777e-17	1.15567e-15
TNFSF15	2.24059	2.2504	2.28993	3.16142	2.97055	3.14671	0.993016	2.51534	64.7959	8.30704e-16	2.00691e-14
PPP2R2B	0.615673	0.426594	0.755386	0.786516	1.16082	1.11626	0.994688	-0.262909	10.831	0.00099814	0.00411143
GLI2	3.38145	2.50029	3.30629	3.90573	4.1115	4.04906	0.996072	3.52471	17.1528	3.44895e-05	0.000207823
C2orf72	1.13594	1.02302	1.07828	1.7496	1.70132	1.61836	0.99817	0.783086	29.4221	5.82109e-08	5.92255e-07
CAPN6	0.53847	0.277065	0.685886	0.740891	0.706334	1.1683	0.998904	-0.534278	6.89647	0.00863662	0.0260695
PTPRB	1.22075	1.55189	1.41537	2.1141	2.18357	1.99972	0.999311	1.33062	31.515	1.97909e-08	2.17481e-07
TMEM8A	5.39546	5.52828	5.49813	6.38611	6.55865	6.4477	1.00711	6.03293	181.067	2.83458e-41	2.94911e-39
KRT13	2.16555	1.66458	2.20966	2.74818	2.83275	2.96739	1.00717	2.2343	27.3004	1.74177e-07	1.63067e-06
FRAS1	4.69694	3.94462	4.87888	5.48163	5.59041	5.55368	1.01387	5.09337	18.4528	1.74163e-05	0.000111952
TRIM9	1.50403	1.55189	1.38645	2.23422	2.16602	2.22937	1.01454	1.46462	44.5571	2.47047e-11	3.9299e-10
TGM1	3.28627	3.57657	3.28294	4.2833	4.33212	4.3822	1.01555	3.84382	91.4934	1.11963e-21	4.24834e-20
LINC00342	1.4767	1.88734	2.1334	2.24242	2.78755	2.866	1.0159	2.005	13.8642	0.000196507	0.000990287
PKP1	1.76351	1.80232	1.70022	2.5241	2.48898	2.60157	1.0165	1.86519	55.7799	8.10543e-14	1.6162e-12
KIF26B	2.00265	1.75785	2.24231	2.61542	2.99063	2.88685	1.01714	2.21556	28.2201	1.08275e-07	1.04712e-06
ZNF608	3.07471	2.83058	3.03534	3.95152	3.91276	3.85366	1.01745	3.39206	95.7331	1.31461e-22	5.33328e-21
NFASC	1.22075	0.68591	1.26462	1.76107	1.58727	1.76076	1.01962	0.79767	14.2955	0.000156237	0.000805599
ONECUT2	2.69653	2.36601	2.64766	3.38922	3.59635	3.4143	1.01977	2.91958	57.0261	4.3007e-14	8.86315e-13
DENND2A	0.340433	0.821719	0.454709	0.830743	1.14299	0.907565	1.02064	-0.391874	8.68233	0.00321309	0.0113786
NPTX1	2.66661	2.66587	2.83053	3.60831	3.66356	3.61827	1.02195	3.09378	99.6912	1.78108e-23	7.92336e-22
VGLL3	4.31824	4.58489	4.41447	5.46243	5.39993	5.43389	1.0228	4.97781	152.06	6.14674e-35	4.72018e-33
DIRAS1	1.18742	1.24867	0.965493	1.66663	1.84058	1.84843	1.02658	0.908351	27.8652	1.30068e-07	1.24389e-06
SOGA3	0.949705	0.709451	0.73259	1.36963	1.21303	1.40359	1.02756	0.239949	19.9702	7.86591e-06	5.45288e-05
RALGPS2	4.40959	4.56083	4.43403	5.47642	5.44246	5.47321	1.02788	5.00864	213.677	2.16587e-48	3.28728e-46
MMP16	0.825212	0.56207	0.945807	1.36963	1.21303	1.3445	1.02792	0.206925	17.7299	2.54599e-05	0.000158599
MIR614	2.14833	2.15074	2.43113	3.00134	3.21628	3.12053	1.02845	2.5251	52.2897	4.78882e-13	8.89562e-12
LOC101927550	0.735817	0.612889	0.612867	1.12521	1.17843	1.06227	1.03034	-0.109268	18.0377	2.16579e-05	0.000136497
SYNE2	6.09731	5.43074	6.42145	6.95442	7.08872	7.13282	1.03247	6.62458	17.6316	2.681e-05	0.000166206
NKAIN4	1.86186	2.30551	1.74647	2.659	2.86029	2.95263	1.03518	2.19834	26.0453	3.33496e-07	2.99821e-06
PKI55	1.9638	1.52561	1.97731	2.56395	2.70489	2.68134	1.03716	1.99075	34.0818	5.28429e-09	6.30644e-08
SLIT2	1.71755	1.24867	1.72353	2.48312	2.26825	2.27755	1.03743	1.62566	25.3619	4.75222e-07	4.16215e-06
CAMK2D	3.08832	3.25927	3.24317	4.22028	4.07671	4.17311	1.04194	3.65097	118.383	1.4294e-27	7.84713e-26
ALPPL2	1.30086	2.05292	1.52557	2.51057	2.446	2.3914	1.04343	1.74953	17.2495	3.27786e-05	0.000198627
LINC00319	0.428654	0.509396	0.661954	0.717526	0.971745	1.13381	1.04537	-0.426377	11.5736	0.000668941	0.00290573
ADRA1B	0.781207	0.86429	0.799927	1.35457	1.51979	1.20198	1.04628	0.283446	20.8285	5.02311e-06	3.61423e-05
ADRB1	0.640516	0.799954	0.637619	1.01452	1.34366	1.20198	1.05079	0.00419046	17.1363	3.47913e-05	0.000209544
PRICKLE2	0.969448	1.24867	1.32682	1.86042	1.90547	1.84843	1.05135	1.0141	30.8341	2.81049e-08	3.02655e-07
FAM171A2	1.53085	1.71197	1.66453	2.57048	2.356	2.34694	1.05192	1.72048	44.3289	2.77592e-11	4.3748e-10
GCNT4	0.564666	0.661978	0.709427	1.21137	1.16082	0.986989	1.05288	-0.116227	17.6791	2.61488e-05	0.000162576
NPTXR	2.87983	2.9638	3.16445	3.9465	4.02166	3.9285	1.05397	3.44345	96.8782	7.37276e-23	3.05839e-21
DENND2C	2.19939	1.99662	1.96758	2.85911	2.97559	2.92769	1.05448	2.29768	63.4111	1.67766e-15	3.8898e-14
RASAL2-AS1	1.18742	1.13157	1.23248	1.78375	1.96757	1.84843	1.05644	1.00791	35.8727	2.10643e-09	2.64606e-08
TNIK	1.67008	1.74651	1.85599	2.55079	2.4748	2.70502	1.06093	1.89991	50.3585	1.28076e-12	2.31093e-11
SLCO1B3	1.23713	1.18292	1.26462	1.82806	1.92647	2.02816	1.06323	1.0885	37.5891	8.73303e-10	1.14497e-08
ARHGEF37	1.46284	1.60306	1.40098	2.40483	2.2009	2.16252	1.06348	1.51067	39.7619	2.86889e-10	3.96694e-09
SPOCK2	0.712576	0.925879	0.925849	1.33934	1.57403	1.38904	1.06752	0.390288	22.8597	1.74269e-06	1.3776e-05
FAM43A	1.95393	1.91797	2.09816	2.91153	2.90329	2.75693	1.0693	2.22108	63.7617	1.40416e-15	3.29365e-14
EPB41L4A	2.04977	2.35112	2.39529	3.15274	3.27066	3.10727	1.0695	2.58228	57.2842	3.77171e-14	7.81042e-13
KANTR	0.53847	0.535974	0.612867	0.89464	1.01159	1.09848	1.07028	-0.33424	16.4286	5.0517e-05	0.000293171
GHR	1.74071	1.56485	1.60302	2.41938	2.46047	2.46953	1.07821	1.73814	57.6172	3.18433e-14	6.64386e-13
LGR6	0.484607	0.843162	0.799927	1.19454	1.34366	1.18523	1.07856	0.0791339	18.0632	2.13694e-05	0.000134876
CPA4	1.8932	1.09628	1.938	2.48312	2.58455	2.46953	1.07858	1.81363	13.614	0.000224503	0.00110928
KRTAP2-3	2.02168	0.755412	1.52557	2.28278	2.43871	2.20467	1.07876	1.56894	6.11383	0.0134128	0.0375764
ANK2	1.76351	1.72357	2.06204	2.78798	2.64281	2.69914	1.0792	2.04766	48.2234	3.80319e-12	6.63937e-11
ADAMTS9	3.33274	2.97355	3.41409	4.18664	4.29627	4.2656	1.07955	3.7358	72.6988	1.51026e-17	4.21729e-16
SFTA1P	2.0864	1.44376	1.70022	2.62801	2.61074	2.58252	1.08144	1.92453	26.8735	2.17218e-07	2.00024e-06
SPRR3	0.888801	0.843162	1.04166	1.42838	1.56066	1.63078	1.08263	0.543559	27.1044	1.92761e-07	1.79036e-06
ZNF469	4.42576	3.41414	4.50973	5.18531	5.28269	5.24386	1.08534	4.75827	13.7992	0.000203427	0.00101682
TTC28	1.91373	1.51228	1.95779	2.63426	2.55789	2.77382	1.08581	1.9838	36.471	1.54957e-09	1.97735e-08
KCTD12	3.66184	3.35939	3.7167	4.57741	4.6831	4.57124	1.08858	4.1106	99.4848	1.97677e-23	8.73367e-22
LRRC37A4P	2.21601	1.78025	2.34357	2.99163	3.03481	3.09387	1.09378	2.42048	37.8649	7.58165e-10	1.00319e-08
SLC22A20	0.846721	0.661978	0.843134	1.12521	1.53354	1.37435	1.0979	0.251329	18.9764	1.32343e-05	8.69767e-05
NRXN3	2.12212	1.86655	2.35107	2.99163	3.11474	3.00604	1.09875	2.41601	46.3493	9.89421e-12	1.64213e-10
FAM155B	1.00814	0.799954	0.661954	1.32395	1.53354	1.38904	1.10023	0.350526	22.0389	2.67184e-06	2.03119e-05
DENND5B	4.00091	3.52775	4.09513	4.92976	4.94603	4.97833	1.10924	4.45627	60.257	8.32444e-15	1.81715e-13
CHST4	0.564666	0.426594	0.685886	0.873654	1.26341	0.907565	1.11088	-0.309623	13.3511	0.000258266	0.00125495
RGMA	0.735817	0.821719	0.685886	1.41392	1.37455	1.11626	1.11114	0.173549	21.5463	3.45396e-06	2.5757e-05
TFCP2L1	0.825212	0.925879	0.885084	1.51224	1.43441	1.54152	1.11537	0.466428	30.3925	3.52881e-08	3.7377e-07
LPCAT1	8.54068	8.33224	8.52641	9.56455	9.58412	9.60261	1.1165	9.12922	199.829	2.27536e-45	2.9651e-43
IGFL1	5.27865	4.30676	5.20294	6.11818	6.11595	6.04092	1.12523	5.61635	19.4859	1.01346e-05	6.85234e-05
HES2	0.615673	0.86429	0.755386	1.33934	1.26341	1.3445	1.1275	0.184548	24.7131	6.65292e-07	5.68153e-06
NEXN	4.32783	3.6238	4.1944	5.19063	5.06324	5.22658	1.12939	4.66646	40.7571	1.72373e-10	2.45722e-09
ACSS1	2.19939	2.20971	2.11589	3.12192	3.14641	3.09835	1.13088	2.50031	96.5298	8.79105e-23	3.62343e-21
ELOVL2	3.52845	3.35193	3.38879	4.48011	4.47971	4.49178	1.13367	3.96353	181.39	2.40904e-41	2.52675e-39
ALPP	5.13307	5.15022	5.1523	6.2058	6.26969	6.30147	1.13664	5.78244	312.512	6.19583e-70	2.16034e-67
DSCAM	0.712576	0.277065	0.965493	1.2607	1.38975	0.986989	1.14386	0.0235848	7.8712	0.00502284	0.0165855
BEST3	0.803377	0.454726	0.637619	1.29267	0.800335	1.32934	1.14553	-0.0755974	11.7655	0.000603381	0.00265532
KCNQ1OT1	1.02711	1.38649	1.74647	1.86042	2.3247	2.44864	1.14652	1.45066	13.8222	0.00020095	0.00100795
SYNC	1.31636	1.24867	1.37177	2.18396	1.92647	2.17953	1.1477	1.28593	42.2297	8.11596e-11	1.21045e-09
H19	2.99508	2.78145	3.04925	3.98615	4.05064	3.9559	1.15834	3.44438	121.061	3.70531e-28	2.08743e-26
NAV2	6.6462	6.03278	6.8393	7.62377	7.76227	7.7258	1.16866	7.22945	33.9851	5.55356e-09	6.61556e-08
SYNE1	3.37407	2.67188	3.54415	4.27932	4.3594	4.35626	1.17624	3.7915	28.0334	1.19239e-07	1.14542e-06
C1QTNF6	5.35005	5.31274	5.44302	6.51664	6.57037	6.49516	1.17757	6.04098	307.984	6.00279e-69	1.9111e-66
RYR2	0.564666	0.56207	0.637619	0.975659	0.991807	1.31402	1.18367	-0.188064	18.611	1.60296e-05	0.000103866
FRMPD3	1.86186	1.59044	1.90779	2.71906	2.65544	2.80155	1.18736	2.03209	61.7475	3.90456e-15	8.79106e-14
IVL	2.54029	1.98702	2.77025	3.51652	3.52587	3.48097	1.19364	2.90667	32.0511	1.50169e-08	1.67735e-07
GUCY1A2	0.758691	0.843162	1.13153	1.70277	1.68908	1.41799	1.19637	0.604487	24.6261	6.96028e-07	5.91922e-06
PDZD2	3.6859	3.41414	3.83646	4.72678	4.82125	4.81109	1.19684	4.25904	111.474	4.65961e-26	2.39496e-24
BNC2	0.664938	0.397902	0.661954	1.228	0.888584	1.15116	1.19743	-0.202751	17.4452	2.95713e-05	0.000181354
TGFB3	0.688953	0.86429	0.709427	1.33934	1.17843	1.56759	1.19977	0.250633	23.0526	1.57627e-06	1.2576e-05
LBH	4.1161	4.11736	4.23552	5.26906	5.37723	5.30519	1.20672	4.80246	269.436	1.50611e-60	3.88608e-58
GRHL3	1.78595	1.82405	1.89758	2.7424	2.66172	2.96739	1.20894	2.10692	63.6156	1.51229e-15	3.52804e-14
MOB3B	4.10051	3.92716	4.16064	5.24373	5.19347	5.24487	1.21112	4.70871	226.122	4.17988e-51	7.34198e-49
LSAMP-AS1	0.590395	0.454726	0.637619	0.89464	1.23002	1.09848	1.21768	-0.239746	19.4593	1.02767e-05	6.91958e-05
EPPK1	5.04394	4.75008	5.08977	5.97957	6.29363	6.1905	1.21788	5.65705	107.446	3.5548e-25	1.75711e-23
PTPRO	1.23713	1.26465	1.47152	2.16681	2.16602	2.21295	1.22557	1.36345	56.4053	5.897e-14	1.19243e-12
EHF	5.58735	6.22165	5.67519	7.1041	7.07174	7.08653	1.24556	6.58509	57.8736	2.79508e-14	5.84695e-13
LOC100268168	0.664938	0.777855	1.114	1.48483	1.53354	1.6674	1.24862	0.52578	25.7777	3.83094e-07	3.40378e-06
ANK1	2.23244	2.08926	2.38801	3.30158	3.24999	3.37054	1.25511	2.66968	97.369	5.754e-23	2.39459e-21
FBXO6	0.758691	1.00411	0.535954	1.4986	1.38975	1.43225	1.25666	0.340159	25.2307	5.08669e-07	4.43102e-06
SLITRK5	2.68463	2.94409	2.53359	3.91089	3.81199	3.85366	1.26068	3.26599	97.9438	4.30436e-23	1.80643e-21
SEMA6A	0.590395	0.612889	0.821692	1.35457	1.27982	1.23489	1.26223	0.103265	28.5134	9.30516e-08	9.10818e-07
MN1	2.37989	1.70026	2.54017	3.31332	3.43354	3.22251	1.26374	2.68569	26.5019	2.63275e-07	2.39529e-06
SHISA2	1.5175	1.19964	1.44372	2.31428	2.21804	2.36934	1.27196	1.49938	55.7008	8.43844e-14	1.6783e-12
RTN2	1.82981	2.05292	1.72353	2.7424	2.88731	3.09387	1.29279	2.21804	57.8727	2.79635e-14	5.84695e-13
KIAA1211L	0.456902	0.509396	0.587682	0.955827	1.19583	0.986989	1.29781	-0.317717	22.6989	1.8948e-06	1.4806e-05
GDNF	0.640516	0.535974	0.885084	1.42838	1.26341	1.31402	1.29848	0.167599	27.7323	1.3932e-07	1.32256e-06
LINC01559	1.00814	1.09628	1.18289	2.04068	1.76099	1.9707	1.29867	1.01711	45.6129	1.44086e-11	2.35597e-10
HR	1.33169	1.35698	1.37177	2.24242	2.38663	2.19633	1.30421	1.45843	66.8586	2.91693e-16	7.29289e-15
CLIC5	1.18742	1.04169	1.16597	2.25059	1.82947	1.82701	1.30543	1.0857	34.6821	3.88179e-09	4.69784e-08
MARCO	0.640516	0.755412	0.799927	1.38455	1.37455	1.44637	1.30569	0.267193	35.6372	2.37703e-09	2.95719e-08
HERPUD2	3.86785	3.97164	3.7021	5.09867	5.14949	5.04596	1.30777	4.54769	219.979	9.14085e-50	1.51187e-47
PRKXP1	0.399842	0.821719	0.482302	0.995222	1.17843	1.28289	1.30812	-0.130344	18.6266	1.58983e-05	0.000103119
REEP1	2.74888	2.82521	2.87805	4.05301	3.9846	3.98521	1.31708	3.40779	196.307	1.33597e-44	1.67333e-42
HOXB9	0.825212	0.732615	1.04166	1.6043	1.54716	1.71483	1.32257	0.591331	37.8435	7.6655e-10	1.01324e-08
LOC100126784	0.590395	0.368629	0.777829	1.12521	1.16082	1.25106	1.32383	-0.0955284	23.8184	1.05863e-06	8.66585e-06
IFNGR1	3.8088	4.0521	3.75396	5.2075	5.11675	5.18823	1.35468	4.60921	208.855	2.4413e-47	3.38658e-45
CSDC2	1.20418	1.26465	1.16597	2.01216	2.15716	2.22118	1.36018	1.2626	63.401	1.68629e-15	3.89872e-14
PLXNA2	2.4865	2.47304	2.74199	3.76752	3.77773	3.79418	1.36307	3.15131	147.724	5.45183e-34	4.01909e-32
VIM-AS1	0.735817	0.338749	0.56205	1.21137	1.05037	1.20198	1.38593	-0.151609	24.7786	6.43081e-07	5.51255e-06
CRLF3	2.20772	2.08026	2.32082	3.41849	3.4372	3.31005	1.39	2.72029	129.628	4.94276e-30	3.09546e-28
GALNT5	1.26935	1.14889	1.35694	2.18396	2.356	2.15394	1.40472	1.3766	66.5194	3.46474e-16	8.59588e-15
SPINK5	1.02711	1.14889	0.965493	1.89207	1.95741	1.98044	1.40993	1.0048	62.6493	2.46988e-15	5.65967e-14
IGFBP3	6.66145	6.02283	6.64278	7.88316	7.8739	7.86288	1.41223	7.32768	72.3915	1.7647e-17	4.89601e-16
IL18	0.590395	0.709451	0.482302	1.29267	1.23002	1.21852	1.4168	-0.00870708	33.8894	5.83363e-09	6.89191e-08
UNC5A	2.0864	2.30551	2.19306	3.32109	3.53273	3.39986	1.43477	2.74183	126.763	2.09322e-29	1.2738e-27
CNGB1	0.456902	0.612889	0.90561	1.39931	1.40479	1.3445	1.43645	0.201767	31.0152	2.5602e-08	2.7709e-07
HAPLN3	3.17164	3.21883	3.39969	4.66552	4.58581	4.59995	1.4486	4.01133	251.49	1.22906e-56	2.73381e-54
SDPR	0.615673	0.732615	0.587682	1.21137	1.47773	1.3595	1.45319	0.150694	36.353	1.64625e-09	2.09244e-08
GRID1	0.846721	0.587703	0.984914	1.6043	1.70132	1.5932	1.46382	0.565977	42.2493	8.03488e-11	1.19975e-09
GFRA1	0.867914	0.245205	0.755386	1.24444	1.46344	1.37435	1.46929	0.162273	16.4643	4.95751e-05	0.000288094
CYP26A1	0.484607	0.426594	0.482302	0.995222	0.867023	1.23489	1.46985	-0.375485	25.188	5.20051e-07	4.52101e-06
TINCR	0.825212	0.56207	0.612867	1.2607	1.41968	1.5283	1.47501	0.229434	36.0313	1.94175e-09	2.45352e-08
BSN	0.909389	0.821719	1.02299	1.87105	1.84058	1.69131	1.47582	0.798452	56.0415	7.09566e-14	1.42366e-12
MAPK8IP2	2.42348	2.50702	2.59175	3.89796	3.78062	3.76067	1.4769	3.15736	189.089	5.02614e-43	5.78949e-41
CELF2	2.90568	2.57268	2.81976	4.08987	4.14324	4.13657	1.49316	3.48178	182.718	1.2361e-41	1.30712e-39
S1PR1	1.64574	1.21617	1.31152	2.64049	2.51694	2.3088	1.4938	1.67185	53.1826	3.03938e-13	5.75786e-12
ARL6IP5	5.16553	5.32136	5.11092	6.72687	6.66164	6.65455	1.50485	6.10348	395.761	4.61041e-88	2.20292e-85
ADORA1	0.456902	0.661978	0.587682	1.17752	1.21303	1.37435	1.51118	-0.0153294	36.0332	1.9398e-09	2.45346e-08
PKDCC	0.688953	0.661978	0.612867	1.4427	1.51979	1.23489	1.51219	0.213277	40.2816	2.19865e-10	3.09322e-09
SPRR2C	0.564666	0.245205	0.535954	1.228	0.9514	0.947824	1.51682	-0.375139	23.6807	1.13718e-06	9.28526e-06
RUNDC3A	1.26935	1.55189	1.06009	2.29862	2.48191	2.40593	1.52983	1.54496	58.1963	2.37227e-14	5.00075e-13
SPRR1B	1.54408	1.26465	1.61553	2.74818	2.61721	2.52381	1.53376	1.82501	79.9378	3.86382e-19	1.22776e-17
MYO16-AS1	0.53847	0.48232	0.755386	1.2607	1.32796	1.37435	1.54278	0.0792059	39.6484	3.04056e-10	4.1819e-09
PCLO	3.24637	2.69565	3.47029	4.52454	4.70453	4.65418	1.56676	3.99313	62.1549	3.1747e-15	7.19803e-14
NOG	0.615673	0.509396	0.397887	1.07093	1.16082	1.31402	1.57986	-0.1515	34.8306	3.59684e-09	4.37762e-08
PP14571	0.988924	0.732615	0.73259	1.56556	1.76099	1.83776	1.5814	0.666655	49.892	1.62446e-12	2.90668e-11
SPNS2	2.54029	3.03074	2.79246	4.2182	4.27187	4.23542	1.5846	3.58334	144.084	3.40591e-33	2.44109e-31
PSAPL1	0.53847	0.245205	0.482302	1.07093	1.12493	0.927835	1.61181	-0.408621	30.0845	4.13627e-08	4.32432e-07
ABLIM2	0.399842	0.277065	0.535954	0.830743	1.16082	1.06227	1.65014	-0.452011	28.3257	1.02527e-07	9.96013e-07
JPH2	1.20418	1.49884	1.35694	2.57699	2.64281	2.65118	1.72109	1.76946	123.035	1.36979e-28	7.8193e-27
LINC01279	1.88283	1.14889	2.06204	3.04423	3.12386	3.29062	1.74464	2.3736	34.7121	3.8225e-09	4.63043e-08
SPRR2D	1.33169	0.612889	1.21614	2.30647	2.45325	2.1279	1.8044	1.36232	33.8387	5.98762e-09	7.05445e-08
MARCH4	3.77835	3.18983	3.90688	5.34345	5.57138	5.42322	1.87745	4.76462	99.4006	2.06258e-23	9.08169e-22
LY6G6C	0.51179	0.454726	0.454709	1.38455	1.26341	1.23489	1.89462	-0.0412057	55.8216	7.9356e-14	1.58724e-12
TMEM198	0.803377	0.68591	0.661954	1.70277	1.6263	2.02816	1.93437	0.686483	63.5685	1.54886e-15	3.60682e-14
PPM1E	0.309785	0.454726	0.535954	1.2607	1.34366	1.37435	2.08335	-0.0279925	64.0989	1.18328e-15	2.78568e-14
MUC16	3.42142	2.41695	3.7167	5.09754	5.42597	5.44799	2.16919	4.5877	34.199	4.97549e-09	5.94892e-08
CCNA1	0.399842	0.212626	0.277054	1.05237	1.08813	1.28289	2.38193	-0.374985	60.0734	9.13863e-15	1.98481e-13
PLCXD3	0.246463	0.535974	0.368614	1.4986	1.05037	1.67941	2.44728	0.0788297	45.9412	1.21859e-11	2.00779e-10
